# Supplementary material for: Radical coupling of aryl halides to arenes facilitated by Ni(COD)(DQ) and other nickel sources
Source: Royal Society of Chemistry journal article supplement (doi:10.1039/d3ob01745a), 2023-12-23
Supplement: d3ob01745a1.pdf [file d3ob01745a1.pdf]

## Supplementary information

### Radical Coupling of Aryl Halides to Arenes Promoted by Ni(COD)(DQ) and other Nickel Sources

Sebastian Tyerman<sup>[a]</sup>, Craig M. Robertson<sup>[b]</sup> and John A. Murphy<sup>\*[a]</sup>

---

[a] Department of Pure and Applied Chemistry, University of Strathclyde, 295 Cathedral Street, Glasgow G1 1XL, United Kingdom  
[b] GSK Medicines Research Centre, Gunnels Wood Road, Stevenage, Herts SG1 2NY, United Kingdom

#### Contents

|                                                                    |     |
|--------------------------------------------------------------------|-----|
| <i>General information and procedures</i> .....                    | S2  |
| <i>Reactant synthesis</i> .....                                    | S4  |
| <i>Substrate scope</i> .....                                       | S5  |
| <i>2,6-Dimethyliodobenzene reaction condition screen</i> .....     | S14 |
| <i>Deuterated solvent experiments</i> .....                        | S15 |
| <i>Investigating the source of hydrogen atom abstraction</i> ..... | S15 |
| <i>Radical scavenging experiments with TEMPO</i> .....             | S22 |
| <i>GC-FID calibration information</i> .....                        | S22 |
| <i>NMR spectra</i> .....                                           | S27 |
| <i>FTIR spectra</i> .....                                          | S49 |
| <i>GC-FID traces</i> .....                                         | S51 |
| <i>References</i> .....                                            | S73 |

## General information and procedures

All reactions were carried out using air-free techniques under argon or prepared in a glovebox (Innovative Technology Inc., USA) under a nitrogen atmosphere and sealed, unless otherwise stated. All reagents and solvents were obtained from commercial suppliers (Fluorochem, Fisher Scientific or Sigma Aldrich) and used without further purification, unless otherwise stated. Anhydrous hexane, dichloromethane (DCM) and diethyl ether (Et<sub>2</sub>O), where employed, were dried using a Pure-Solv 400 solvent purification system (Innovative Technology Inc., USA). Thin Layer Chromatography was performed on silica gel pre-coated aluminium plates (60 Å, F254 UV indicator) purchased from Merck. The thin layer chromatograms were analysed by UV (254 nm, UVP mineralight UVG-11 lamp) and staining either with basic KMnO<sub>4</sub> [KMnO<sub>4</sub> (6 g), K<sub>2</sub>CO<sub>3</sub> (40 g), NaOH (5 mL, 10% w/w) in water (600 mL)] or an ethanolic solution of phosphomolybdic acid [phosphomolybdic acid hydrate (10 g) in ethanol (100 mL)]. Flash Column Chromatography purification was performed with 35-70 µm particle size silica gel 60 Å (200-400 mesh) purchased from Prolabo. Melting points were determined using a Gallenkamp Griffin Melting Point Apparatus. NMR spectroscopy was performed using a Bruker AV3-400 spectrometer. <sup>1</sup>H NMR, <sup>13</sup>C NMR, <sup>2</sup>H NMR and <sup>19</sup>F NMR spectra were recorded on this spectrometer operating at 400 MHz, 101 MHz, 61 MHz and 376 MHz respectively. All spectral data were acquired at 295 K. For <sup>1</sup>H and <sup>13</sup>C NMR spectra, chemical shifts (δ) are quoted in parts per million (ppm) relative to the following residual solvent peaks; δ<sub>H</sub> 7.26 and δ<sub>C</sub> 77.2 ppm for CDCl<sub>3</sub>, δ<sub>H</sub> 7.16 and δ<sub>C</sub> 128.0 ppm for C<sub>6</sub>D<sub>6</sub>, δ<sub>C</sub> 25.3, 67.5 ppm for *d*<sub>8</sub>-THF. <sup>2</sup>H NMR spectra chemical shifts are quoted relative to the residual deuterated solvents at the same ppm as in <sup>1</sup>H NMR spectra. <sup>19</sup>F NMR spectra chemical shifts are quoted relative to a 2,2,2-trifluoroethanol (TFE) internal standard at δ<sub>F</sub> -77.51 ppm in CDCl<sub>3</sub>. Coupling constants (*J*) are reported in Hertz (Hz) to the nearest 0.1 Hz. The multiplicity abbreviations used are: s (singlet), d (doublet), t (triplet), q (quartet), quin (quintet), m (multiplet), br (broad), dd (doublet of doublets), dt (doublet of triplets), dq (doublet of quartets), ddd (doublet of doublets of doublets), ddt (doublet of doublets of triplets). Infrared (IR) spectra were obtained on a Shimadzu IRAffinity-1 FTIR-ATR spectrometer instrument. GCMS spectra were obtained on an Agilent 7890A GC system coupled to a 5975C inert XL EI/CI MSD triple axis-mass detector. Electron impact (EI) ionisation was utilised, specifically the method E1320-25-1-SPLIT. The column temperature was 320 °C, and the carrier gas was helium with a flow rate of 1 mL/min. GC-FID analyses were carried out using either an Agilent 7890A gas chromatograph fitted with an Agilent HP5 column (30 m x 0.25 mm x 0.25 µm), or a Thermo Finnigan Focus gas chromatograph fitted with an Agilent HP5 column (30 m x 0.32 mm x 0.25 µm). Helium was used as the carrier gas (2.0 mL/min flow rate). The maximum column temperature was 340 °C and the instrument was operated in a splitless mode.

### General procedure for coupling reaction of simple aryl halides (General procedure A)

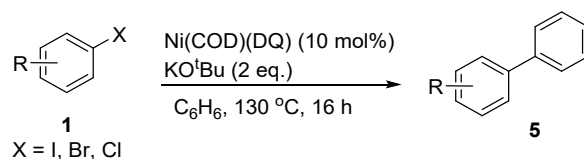

An oven-dried 15 mL screw-top pressure flask was charged with aryl halide **1** (0.7 mmol), Ni(COD)(DQ) (23.2 mg, 0.07 mmol), KO<sup>t</sup>Bu (157 mg, 1.4 mmol) and anhydrous benzene (5 mL) with a stirbar inside a glovebox. The flask was capped, removed from the glovebox and stirred in an oil bath at 130°C for 16 h. The reaction mixture was then allowed to cool to room temperature, filtered through a short Celite plug, washed with hexane/EtOAc and concentrated *in vacuo*. The crude mixture was then purified *via* column chromatography with hexane/EtOAc eluent to yield to product **5**.

### General procedure for coupling reaction of 2,6-dimethyliodobenzene (General procedure B)

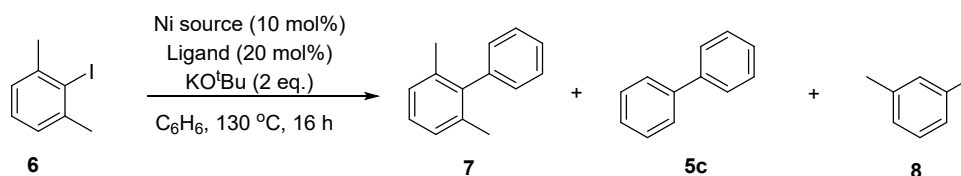

An oven-dried 15mL screw-top pressure flask was charged with **6** (101  $\mu$ l, 0.7 mmol), a nickel source (0.07 mmol), a ligand if used (0.14 mmol), KO<sup>t</sup>Bu (157 mg, 1.4 mmol) and anhydrous benzene (5 mL) with a stirbar inside a glovebox. The flask was capped, removed from the glovebox and stirred in an oil bath at 130°C for 16 h. The reaction mixture was then allowed to cool to room temperature, *n*-dodecane was added as an internal standard (approx. 0.1 mmol) and the mixture filtered was through a short Celite plug and washed with hexane. An aliquot of the mixture was removed, diluted with CHCl<sub>3</sub> and product yields determined by GC-FID calibrated with authentic product samples (see page S24) using *n*-dodecane as an internal standard.

## Reactant synthesis

### Synthesis of Ni(COD)(DQ)<sup>1</sup>

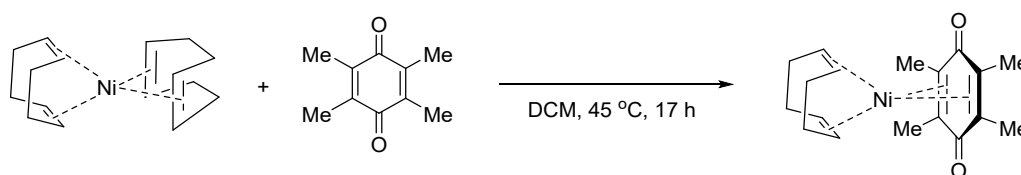

In a glovebox, a large oven-dried screw-top pressure flask (35 mL) was charged with a stirbar, Ni(COD)<sub>2</sub> (1.68 g, 6.1 mmol), duroquinone (1.0 g, 6.1 mmol) and degassed DCM (23.5 mL). Upon the first addition of DCM, the yellow solids became a black solution. The flask was capped, removed from the glovebox and heated at 45°C in an oil bath for 17 h. The reaction mixture was then allowed to cool to room temperature, filtered through a short celite plug and washed with DCM. Volatiles were removed *in vacuo* yielding a red lumpy solid. The solid was then washed with a 40:1 mixture of hexane/DCM (69 mL x 2) to removed free COD, and then dried under high vacuum yielding Ni(COD)(DQ) as a dark red powder (1.90 g, 94%). <sup>1</sup>H NMR (400 MHz, C<sub>6</sub>D<sub>6</sub>) δ 3.46 (s, 4H), 1.96 (s, 12H), 1.84 – 1.79 (m, 4H), 1.59 – 1.51 (m, 4H) <sup>13</sup>C NMR (101 MHz, C<sub>6</sub>D<sub>6</sub>) δ 155.0, 112.5, 100.0, 29.3, 12.6. IR  $\nu_{max}/\text{cm}^{-1}$  (neat): 1549 (s). The data are consistent with those reported in the literature.<sup>1</sup>

### Synthesis of 1-(allyloxy)-2-iodobenzene I-1i

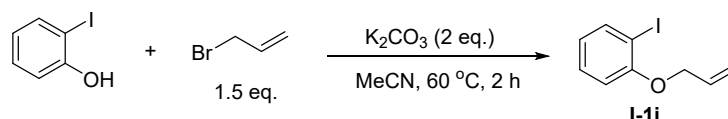

A 10 ml microwave vial was charged with 2-iodophenol (550 mg, 2.5 mmol), K<sub>2</sub>CO<sub>3</sub> (0.69 g, 5 mmol), then capped and evacuated. The vial was back-filled with Ar, and then allyl bromide (0.32 mL, 3.75 mmol) and degassed MeCN (5 mL) were added via syringe, giving a light brown solution with insolubles. The reaction was stirred at 60°C for 2 h, after which time the reaction was washed with H<sub>2</sub>O (5 mL) and then extracted into Et<sub>2</sub>O (8 mL x 3). The organic layers were then washed with brine (5 mL x 2), dried over MgSO<sub>4</sub> and concentrated giving a yellow oil I-1i (610 mg, 2.36 mmol, 94%) which was used in subsequent reaction without further purification. <sup>1</sup>H NMR (400 MHz, CDCl<sub>3</sub>) δ 7.80 (dd, *J* = 7.8, 1.6 Hz, 1H), 7.31 – 7.27 (m, 1H), 6.81 (dd, *J* = 8.2, 1.3 Hz, 1H), 6.75 – 6.70 (m, 1H), 6.07 (ddt, *J* = 17.3, 10.6, 4.8 Hz, 1H), 5.55 (dd, *J* = 17.3, 5.1 Hz, 1H), 5.33 (dq, *J* = 10.6, 1.6 Hz, 1H), 4.60 (dt, *J* = 4.8, 1.7 Hz, 2H). <sup>13</sup>C NMR (101 MHz, CDCl<sub>3</sub>) δ 157.1, 139.5, 132.6, 129.4, 122.7, 117.6, 112.6, 86.7, 69.7. IR  $\nu_{max}/\text{cm}^{-1}$  (neat): 1273, 1244, 926. *m/z* (EI): 260.0 ([M]<sup>+</sup>, 100), 219.9 (20), 190.9 (20), 133.1 (33), 119.0 (13), 105.1 (60), 92.0 (40). The data are consistent with those reported in the literature.<sup>2</sup>

### Synthesis of 2,6-dimethylbiphenyl **7**

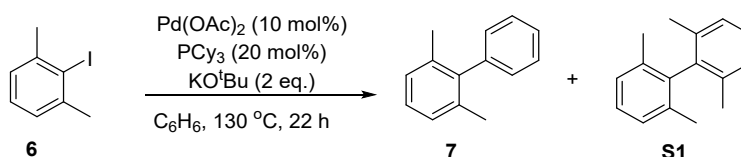

A sample of compound **7** was prepared by combining **6** (812 mg, 3.5 mmol), Pd(OAc)<sub>2</sub> (78.6 mg, 0.35 mmol), PCy<sub>3</sub> (196 mg, 0.7 mmol), KO<sup>t</sup>Bu (786 mg, 7 mmol) and anhydrous benzene (15 mL) in an oven-dried pressure tube (35 mL) with a stirbar inside a glovebox. The flask was capped, removed from the glovebox and stirred in an oil bath at 130°C for 22 h, turning the solution from yellow to black. The reaction mixture was cooled, filtered through a short Celite plug and washed with hexanes. The crude mixture was concentrated and then purified by column chromatography with hexane as eluent, yielding a colourless oil (144 mg). **7** <sup>1</sup>H NMR (400 MHz, CDCl<sub>3</sub>) δ 7.46 – 7.42 (m, 2H), 7.38 – 7.33 (m, 1H), 7.19 – 7.11 (m, 5H), 2.05 (s, 6H) *m/z* (EI): 182.1 ([M]<sup>+</sup>, 93), 167.1 (100), 152.1 (33), 139.0 (7), 128.1 (13), 115.0 (20), 89.0 (13), 77.0 (13), 63.0 (13), 51.0 (17).

Analysis by NMR and GCMS showed a 1:0.047 mixture of **7** (0.748 mmol, 21.4 %) and the homocoupled product **S1** (0.0349 mmol, 0.9 %), and thus this impurity is then corrected for in the calibration curve calculations (Page S25) using the following equation:

$$\begin{aligned} \text{Sample mass} &= \text{mmol}(\mathbf{7}) * 182.27 + \text{mmol}(\mathbf{S1}) * 210.31 \\ \text{Sample mass} &= \text{mmol}(\mathbf{7}) * 182.27 + \text{mmol}(\mathbf{7}) * 0.0466 * 210.31 \\ \text{mmol}(\mathbf{7}) &= \frac{\text{sample mass}}{192.07} \end{aligned}$$

### Substrate scope

#### Coupling of I-1a with benzene using Ni(COD)(DQ)

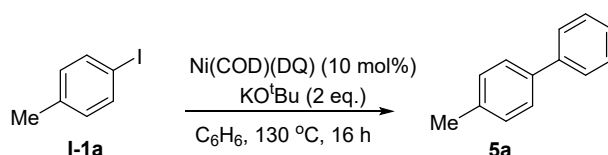

This reaction was carried out as described in General procedure A. The crude mixture was purified by column chromatography with hexane eluent yielding **5a** as a white waxy solid (112 mg, 0.66 mmol, 95%). <sup>1</sup>H NMR (400 MHz, CDCl<sub>3</sub>) δ 7.62 – 7.59 (m, 2H), 7.53 – 7.50 (m, 2H), 7.47 – 7.42 (m, 2H), 7.36 – 7.32 (m, 1H), 7.29 – 7.26 (m, 2H), 2.42 (s, 3H). <sup>13</sup>C NMR (101 MHz, CDCl<sub>3</sub>) δ 141.3, 138.5, 137.1, 129.6, 128.9, 127.1, 21.2. IR *v*<sub>max</sub>/cm<sup>-1</sup> (neat): 3030, 2916, 1485. *m/z* (EI): 168.2 ([M]<sup>+</sup>, 100), 152.1 (23), 139.1

(5), 128.1 (4), 115.1 (8), 91.1 (5), 82.3 (5). The data are consistent with those reported in the literature.<sup>2</sup>

#### Coupling of I-1b with benzene using Ni(COD)(DQ)

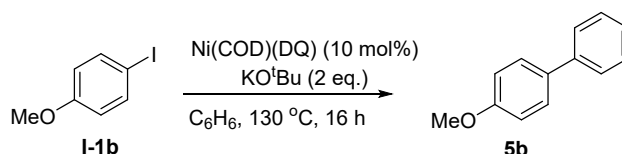

This reaction was carried out as described in General procedure A. The crude mixture was purified by column chromatography with a 5% EtOAc/hexane eluent yielding **5b** as a white solid (111 mg, 0.603 mmol, 86%). **M.p.** 85-87°C (*lit.* 88-89°C)<sup>7</sup>. **<sup>1</sup>H NMR** (400 MHz, CDCl<sub>3</sub>) δ 7.57 – 7.52 (m, 4H), 7.44 – 7.39 (m, 2H), 7.33 – 7.28 (m, 1H), 7.01 – 6.96 (m, 2H), 3.86 (s, 3H). **<sup>13</sup>C NMR** (101 MHz, CDCl<sub>3</sub>) δ 159.3, 141.0, 134.0, 128.9, 128.3, 126.9, 126.2, 114.4, 55.5. **IR**  $\nu_{\text{max}}$ /cm<sup>-1</sup> (neat): 2835, 1483, 1246, 1034. **m/z** (EI): 184.1 ([M]<sup>+</sup>, 100), 169.1 (47), 152.0 (7), 141.0 (53), 115.0 (40), 89.0 (7), 76.0 (5), 63.0 (8). The data are consistent with those reported in the literature.<sup>2</sup>

#### Coupling of I-1c with benzene using Ni(COD)(DQ)

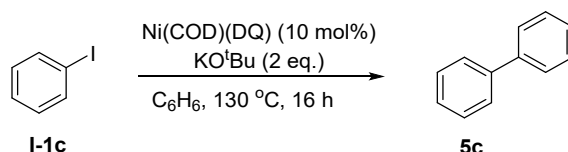

This reaction was carried out as described in General procedure A. The crude mixture was purified *via* column chromatography with hexane eluent yielding **5c** as a white solid (95.9 mg, 0.623 mmol, 89%). **M.p.** 66-68°C (*lit.* 68-70°C)<sup>8</sup>. **<sup>1</sup>H NMR** (400 MHz, CDCl<sub>3</sub>) δ 7.65 – 7.61 (m, 4H), 7.50 – 7.45 (m, 4H), 7.40 – 7.36 (m, 2H). **<sup>13</sup>C NMR** (101 MHz, CDCl<sub>3</sub>) δ 141.4, 128.9, 127.4, 127.3. **IR**  $\nu_{\text{max}}$ /cm<sup>-1</sup> (neat): 3059, 1476, 1429. **m/z** (EI): 154.1 ([M]<sup>+</sup>, 100), 76.0 (13), 51.0 (13). The data are consistent with those reported in the literature.<sup>2</sup>

#### Coupling of I-1d with benzene using Ni(COD)(DQ)

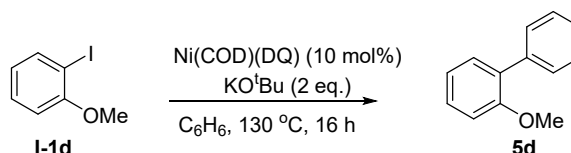

This reaction was carried out as described in General procedure A. The crude mixture was purified by column chromatography with a 20% EtOAc/hexane eluent yielding **5d** as a pale-yellow oil (101 mg, 0.55 mmol, 78%). **<sup>1</sup>H NMR** (400 MHz, CDCl<sub>3</sub>) δ 7.67 – 7.62 (m, 2H), 7.54 – 7.49 (m, 2H), 7.45 – 7.39 (m, 3H), 7.15 – 7.11 (m, 1H), 7.08 (d, *J* = 8.0 Hz, 1H), 3.89 (s, 3H). **<sup>13</sup>C NMR** (101 MHz, CDCl<sub>3</sub>) δ 156.6, 138.7,

131.0, 130.8, 129.7, 128.7, 128.1, 127.0, 120.9, 111.4, 55.6. IR  $\nu_{max}/\text{cm}^{-1}$  ( $\text{CHCl}_3$ ): 1481, 1246, 1197, 1182, 1033.  $m/z$  (EI): 184.1 ( $[\text{M}]^+$ , 100), 169.1 (53), 152.1 (9), 141.1 (40), 115.0 (40). The data are consistent with those reported in the literature.<sup>3</sup>

#### Coupling of I-1e with benzene using Ni(COD)(DQ)

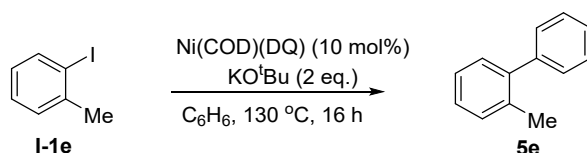

This reaction was carried out as described in General procedure A. The crude mixture was purified by column chromatography with hexane eluent yielding **5e** as a colourless oil (77.6 mg, 0.46 mmol, 66%). <sup>1</sup>H NMR (400 MHz,  $\text{CDCl}_3$ )  $\delta$  7.47 – 7.42 (m, 2H), 7.39 – 7.35 (m, 3H), 7.31 – 7.27 (m, 4H), 2.31 (s, 3H). <sup>13</sup>C NMR (101 MHz,  $\text{CDCl}_3$ )  $\delta$  142.1, 135.5, 130.4, 129.9, 129.3, 128.9, 128.2, 127.4, 126.9, 125.9, 20.6. IR  $\nu_{max}/\text{cm}^{-1}$  ( $\text{CHCl}_3$ ): 3030, 1477.  $m/z$  (EI): 168.1 ( $[\text{M}]^+$ , 100), 153.1 (40), 139.1 (7), 128.1 (7), 115.1 (13). The data are consistent with those reported in the literature.<sup>3</sup>

#### Coupling of I-1f with benzene using Ni(COD)(DQ)

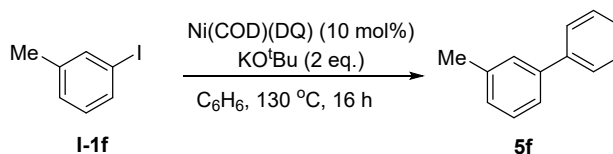

This reaction was carried out as described in General procedure A. The crude mixture was purified *via* column chromatography with hexane eluent yielding **5f** as a colourless oil (91.6 mg, 0.54 mmol, 78%). <sup>1</sup>H NMR (400 MHz,  $\text{CDCl}_3$ )  $\delta$  7.71 – 7.67 (m, 2H), 7.55 – 7.49 (m, 4H), 7.46 – 7.41 (m, 2H), 7.28 – 7.25 (m, 1H), 2.52 (s, 3H). <sup>13</sup>C NMR (101 MHz,  $\text{CDCl}_3$ )  $\delta$  141.5, 141.4, 138.4, 128.8, 128.1, 128.1, 127.3, 124.4, 21.7.  $m/z$  (EI): 168.2 ( $[\text{M}]^+$ ). The data are consistent with those reported in the literature.<sup>3</sup>

#### Coupling of I-1g with benzene using Ni(COD)(DQ)

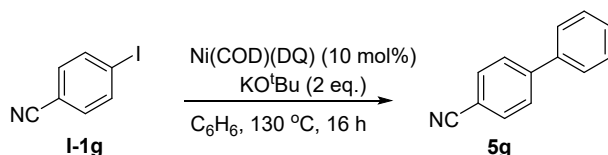

This reaction was carried out as described in General procedure A. The crude mixture was purified by column chromatography with a 20% EtOAc/hexane eluent yielding **5g** as a pale-yellow solid (88.4 mg, 0.47 mmol, 67%). **M.p.** 82-84°C (*lit.* 85-87°C). <sup>1</sup>H NMR (400 MHz,  $\text{CDCl}_3$ )  $\delta$  7.74 – 7.67 (m, 4H), 7.61 – 7.58 (m, 2H), 7.51 – 7.46 (m, 2H), 7.45 – 7.40 (m, 1H). <sup>13</sup>C NMR (101 MHz,  $\text{CDCl}_3$ )  $\delta$  145.8, 139.3, 132.8,

129.3, 128.8, 127.9, 127.4, 119.1, 111.1. IR  $\nu_{max}/\text{cm}^{-1}$  (neat): 2224, 1477.  $m/z$  (EI): 179.2 ( $[\text{M}]^+$ , 100), 151.1 (16), 76.1 (7). The data are consistent with those reported in the literature.<sup>2</sup>

### Coupling of I-1h with benzene using Ni(COD)(DQ)

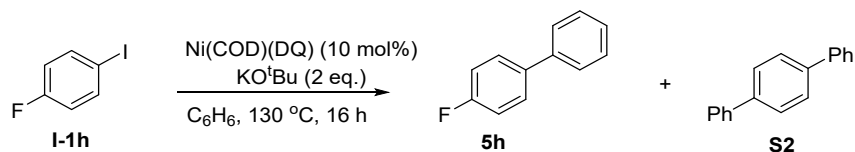

This reaction was carried out as described in General procedure A. The crude mixture was purified by column chromatography with a 5% EtOAc/hexane eluent yielding a mixture of **5h** and *p*-terphenyl **S6** as a yellow solid (96.5 mg). The yield of **5h** was determined to be 0.413 mmol (59 %) by  $^{19}\text{F}$  NMR with a 2,2,2-trifluoroethanol (TFE) internal standard (55.8 mg), therefore the yield of **S2** can be determined from the total product mass as 26.0 mg (0.11 mmol, 16 %). **5h**  $^1\text{H}$  NMR (400 MHz,  $\text{CDCl}_3$ )  $\delta$  7.59 – 7.54 (m, 4H), 7.49 – 7.44 (m, 2H), 7.39 – 7.35 (m, 1H), 7.17 – 7.12 (m, 2H).  $^{13}\text{C}$  NMR (101 MHz,  $\text{CDCl}_3$ )  $\delta$  162.6 (d,  $J = 246.4$  Hz), 140.9, 137.5 (d,  $J = 2.9$  Hz), 129.0, 128.8 (d,  $J = 7.8$  Hz), 127.7, 127.4, 115.8 (d,  $J = 21.6$  Hz).  $^{19}\text{F}$  NMR (376 MHz,  $\text{CDCl}_3$ )  $\delta$  -116.25 – -116.33 (m). IR  $\nu_{max}/\text{cm}^{-1}$  (neat): 1477, 1230.  $m/z$  (EI): 172.2 ( $[\text{M}]^+$ , 100), 153.1 (5), 146.1 (7), 133.1 (5), 120.1 (4), 85.1 (7). The data are consistent with those reported in the literature.<sup>3</sup>

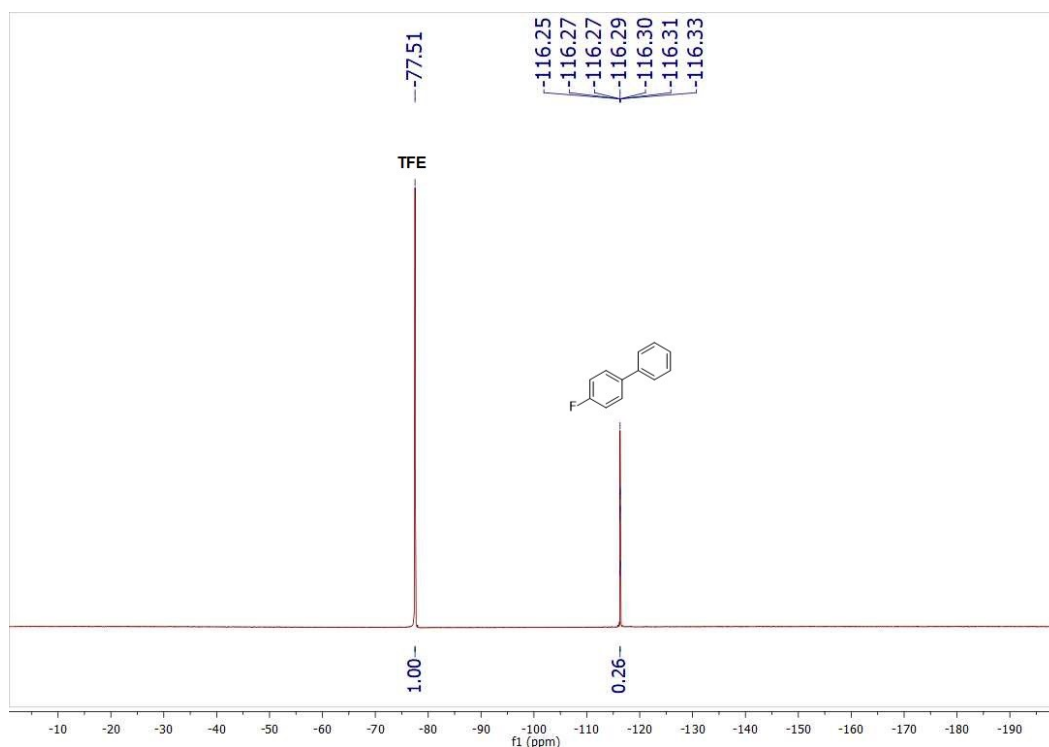

Figure S1 – Obtaining  $^{19}\text{F}$  NMR yield for compound **5h** with a TFE internal standard (55.8 mg).

### Coupling of I-1i with benzene using Ni(COD)(DQ)



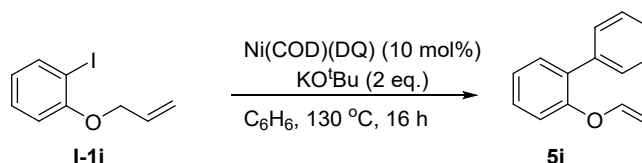

This reaction was carried out as described in General procedure A. The crude mixture was purified by column chromatography with hexane eluent yielding **5i** as a colourless oil (90 mg, 0.43 mmol, 61%). <sup>1</sup>H NMR (400 MHz, CDCl<sub>3</sub>) δ 7.66 – 7.62 (m, 2H), 7.51 – 7.43 (m, 3H), 7.42 – 7.33 (m, 2H), 7.20 – 7.15 (m, 1H), 7.14 – 7.10 (m, 1H), 6.42 – 6.38 (m, 1H), 4.92 – 4.83 (m, 1H), 1.71 (dd, *J* = 6.8, 1.3 Hz, 3H). <sup>13</sup>C NMR (101 MHz, CDCl<sub>3</sub>) δ 154.5, 141.5, 138.0, 131.7, 131.0, 129.6, 128.7, 128.0, 127.1, 122.9, 115.9, 107.2, 9.6. *m/z* (EI): 210.2 ([M]<sup>+</sup>, 100), 195.1 (29), 181.1 (73), 169.1 (44), 152.1 (47), 141.1 (33), 115.1 (40). The data are consistent with those reported in the literature.<sup>4</sup>

#### Coupling of Br-1c with benzene using Ni(COD)(DQ)

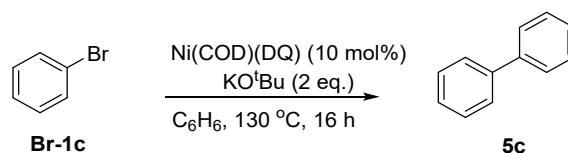

This reaction was carried out as described in General procedure A. The crude mixture was purified by column chromatography with hexane eluent yielding **5c** as a white solid (86.2 mg, 0.56 mmol, 80%). Data are consistent with those reported above.

#### Coupling of Br-1b with benzene using Ni(COD)(DQ)

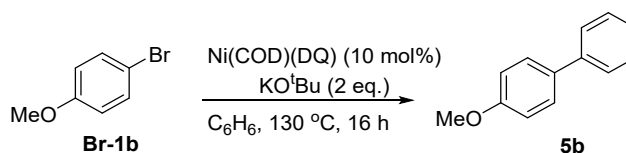

This reaction was carried out as described in General procedure A. The crude mixture was purified by column chromatography with a 2% EtOAc/hexane eluent yielding **5b** as a white solid (109 mg, 0.59 mmol, 84%). Data are consistent with those reported above.

#### Coupling of Br-1a with benzene using Ni(COD)(DQ)

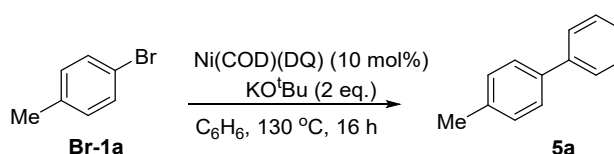

This reaction was carried out as described in General procedure A. The crude mixture was purified by column chromatography with hexane eluent yielding **5a** as a white waxy solid (91.6 mg, 0.55 mmol, 78%). Data are consistent with those reported above.

#### Coupling of Br-1d with benzene using Ni(COD)(DQ)

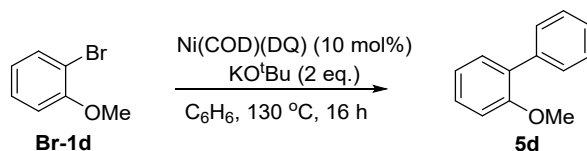

This reaction was carried out as described in General procedure A. The crude mixture was purified by column chromatography with a 5% EtOAc/hexane eluent yielding **5d** as a pale-yellow oil (99.6 mg, 0.54 mmol, 77%). Data are consistent with those reported above.

#### Coupling of Br-1j with benzene using Ni(COD)(DQ)

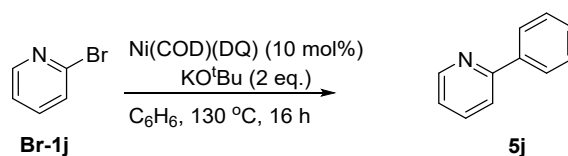

This reaction was carried out as described in General procedure A. The crude mixture was purified by column chromatography with a 5% EtOAc/hexane eluent yielding **5j** as a pale-yellow oil (55.2 mg, 0.36 mmol, 51%).  $^1\text{H NMR}$  (400 MHz,  $\text{CDCl}_3$ )  $\delta$  8.71 – 8.69 (m, 1H), 8.01 – 7.98 (m, 2H), 7.77 – 7.72 (m, 2H), 7.51 – 7.46 (m, 2H), 7.44 – 7.39 (m, 1H), 7.25 – 7.21 (m, 1H).  $^{13}\text{C NMR}$  (101 MHz,  $\text{CDCl}_3$ )  $\delta$  157.6, 149.8, 139.6, 136.9, 129.1, 128.9, 127.1, 122.2, 120.7.  $m/z$  (EI): 155.1 ( $[\text{M}]^+$ , 100). The data are consistent with those reported in the literature.<sup>2</sup>

#### Coupling of Br-1k with benzene using Ni(COD)(DQ)

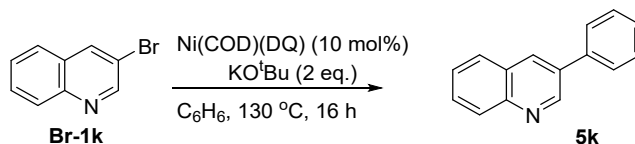

This reaction was carried out as described in General procedure A. The crude mixture was purified by column chromatography with a 5% EtOAc/hexane eluent yielding **5k** as an orange oil (70.4 mg, 0.34 mmol, 49%).  $^1\text{H NMR}$  (400 MHz,  $\text{CDCl}_3$ )  $\delta$  9.19 (d,  $J$  = 2.3 Hz, 1H), 8.30 (d,  $J$  = 2.1 Hz, 1H), 8.15 (d,  $J$  = 8.9 Hz, 1H), 7.88 (dd,  $J$  = 8.1, 1.3 Hz, 1H), 7.74 – 7.70 (m, 3H), 7.58 (ddd,  $J$  = 8.1, 6.9, 1.1 Hz, 1H), 7.55 – 7.50 (m, 2H), 7.46 – 7.41 (m, 1H).  $^{13}\text{C NMR}$  (101 MHz,  $\text{CDCl}_3$ )  $\delta$  150.1, 147.5, 138.0, 134.0, 133.4, 129.5, 129.4, 129.3, 128.2, 128.1, 127.6, 127.1.  $m/z$  (EI): 205.1 ( $[\text{M}]^+$ , 100). The data are consistent with those reported in the literature.<sup>5</sup>

### Coupling of Cl-1c with benzene using Ni(COD)(DQ)

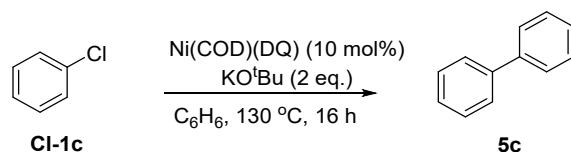

This reaction was carried out as described in General procedure A. The crude mixture was purified by column chromatography with hexane eluent yielding **5c** as a white solid (14.5 mg, 0.094 mmol, 14%). Data are consistent with those reported above.

### Coupling of I-1a with benzene without a nickel source

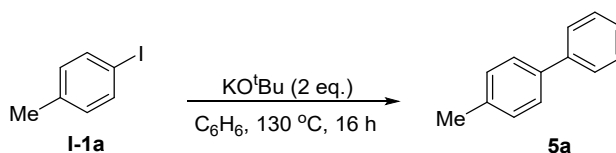

This reaction was carried out as described in General procedure A, except a Ni source was excluded. The crude mixture was purified by column chromatography with hexane eluent yielding **5a** as a white waxy solid (15.9 mg, 0.094 mmol, 13%). Data are consistent with those reported above.

### Coupling of I-1b with benzene without a nickel source

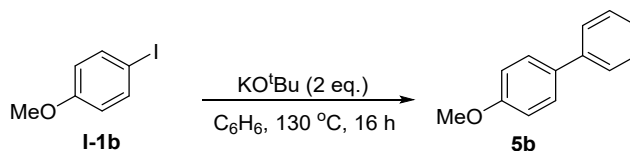

This reaction was carried out as described in General procedure A, except a Ni source was excluded. The crude mixture was purified by column chromatography with a 2% EtOAc/hexane eluent yielding **5b** as a white solid (19.1 mg, 0.107 mmol, 15.2%). Data are consistent with those reported above.

### Coupling of I-1a with benzene using Ni(OAc)<sub>2</sub>

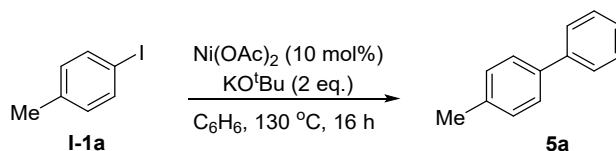

This reaction was carried out as described in General procedure A, except Ni(OAc)<sub>2</sub> (12.4 mg, 0.07 mmol) was employed. The crude mixture was purified by column chromatography with hexane eluent yielding **5a** as a white waxy solid (17.8 mg, 0.106 mmol, 15.1%). Data are consistent with those reported above.

### Coupling of I-1b with benzene using Ni(OAc)<sub>2</sub>

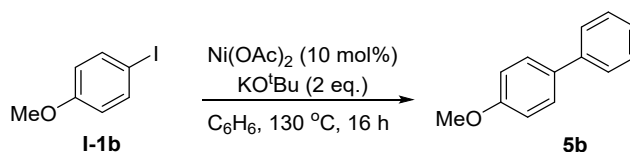

This reaction was carried out as described in General procedure A, except  $\text{Ni(OAc)}_2$  (12.4 mg, 0.07 mmol) was employed. The crude mixture was purified by column chromatography with a 2% EtOAc/hexane eluent yielding **5b** as a white solid (26.3 mg, 0.143 mmol, 20.4%). Data are consistent with those reported above.

#### Coupling of I-1a with benzene using $\text{Ni(acac)}_2$

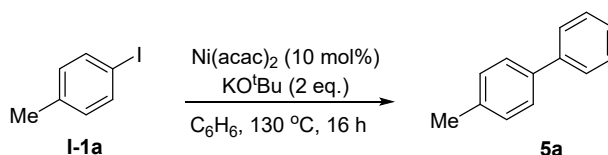

This reaction was carried out as described in General procedure A, except  $\text{Ni(acac)}_2$  (18.0 mg, 0.07 mmol) was employed. The crude mixture was purified by column chromatography with hexane eluent yielding **5a** as a white waxy solid (81.4 mg, 0.484 mmol, 69.1%). Data are consistent with those reported above.

#### Coupling of I-1b with benzene using $\text{Ni(acac)}_2$

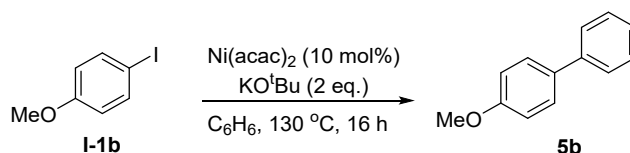

This reaction was carried out as described in General procedure A, except  $\text{Ni(acac)}_2$  (18.0 mg, 0.07 mmol) was employed. The crude mixture was purified by column chromatography with a 2% EtOAc/hexane eluent yielding **5b** as a white solid (85.2 mg, 0.463 mmol, 66.1%). Data are consistent with those reported above.

#### Coupling of I-1a with benzene using $\text{Ni(PPh}_3)_4$

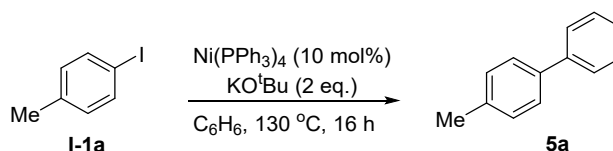

This reaction was carried out as described in General procedure A, except  $\text{Ni(PPh}_3)_4$  (77.5 mg, 0.07 mmol) was employed. The crude mixture was purified by column chromatography with hexane eluent yielding **5a** as a white waxy solid (81.2 mg, 0.441 mmol, 63.0%). Data are consistent with those reported above.

### Coupling of I-1b with benzene using Ni(PPh<sub>3</sub>)<sub>4</sub>

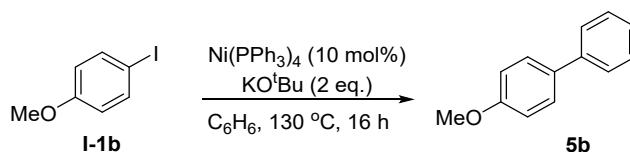

This reaction was carried out as described in General procedure A, except Ni(PPh<sub>3</sub>)<sub>4</sub> (77.5 mg, 0.07 mmol) was employed. The crude mixture was purified by column chromatography with a 2% EtOAc/hexane eluent yielding **5b** as a white solid (83.2 mg, 0.452 mmol, 64.6%). Data are consistent with those reported above.

### Coupling of I-1a with benzene using Ni(COD)<sub>2</sub>

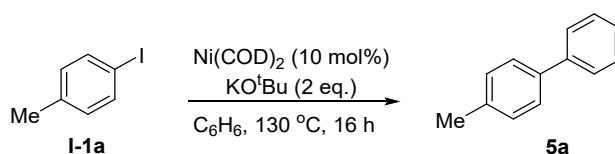

This reaction was carried out as described in General procedure A, except Ni(COD)<sub>2</sub> (19.3 mg, 0.07 mmol) was employed. The crude mixture was purified by column chromatography with hexane eluent yielding **5a** as a white waxy solid (81.3 mg, 0.484 mmol, 69.1%). Data are consistent with those reported above.

### Coupling of I-1b with benzene using Ni(COD)<sub>2</sub>

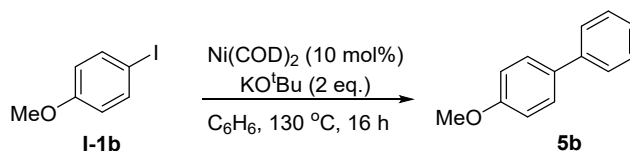

This reaction was carried out as described in General procedure A, except Ni(COD)<sub>2</sub> (19.3 mg, 0.07 mmol) was employed. The crude mixture was purified by column chromatography with a 2% EtOAc/hexane eluent yielding **5b** as a white solid (82.5 mg, 0.448 mmol, 63.9%). Data are consistent with those reported above.

### Coupling of I-1a with benzene using Ni(COD)(DQ) for 4 h

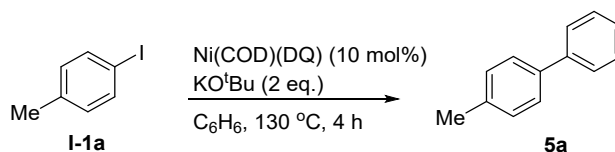

This reaction was carried out as described in General procedure A, except the reaction was run for 4 h. The crude mixture was purified by column chromatography with hexane eluent yielding **5a** as a white waxy solid (85.6 mg, 0.510 mmol, 72.8%). Data are consistent with those reported above.

### Coupling of I-1b with benzene using Ni(COD)(DQ) for 4 h

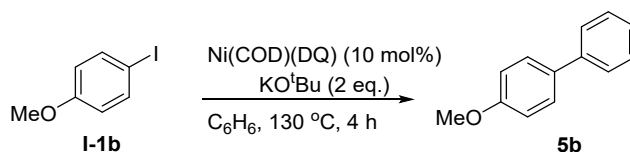

This reaction was carried out as described in General procedure A, except the reaction was run for 4 h. The crude mixture was purified by column chromatography with a 2% EtOAc/hexane eluent yielding **5b** as a white solid (104.7 mg, 0.569 mmol, 81.3%). Data are consistent with those reported above.

### 2,6-Dimethyliodobenzene reaction condition screen

The reactions were carried out according to General procedure B, unless stated otherwise. When the product signal is too weak to be integrated the products are labelled 'trace' and are < 0.8% yield.

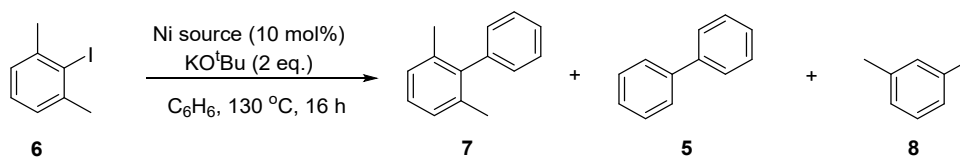

| Entry           | Ni source                          | Ligand           | Dodecane added (mg) | Dodecane (peak area) | 6 (peak area) | 6 (% yield) | 7 (peak area) | 7 (% yield) | 5 (peak area) | 5 (% yield) | 8 (peak area) | 8 (% yield) |
|-----------------|------------------------------------|------------------|---------------------|----------------------|---------------|-------------|---------------|-------------|---------------|-------------|---------------|-------------|
| 1               | -                                  | -                | 18.5                | 792.0                | 2913.6        | 88.3        | trace         | trace       | trace         | trace       | trace         | trace       |
| 2               | NiCl <sub>2</sub>                  | -                | 18.6                | 779.6                | 2834.2        | 87.7        | trace         | trace       | trace         | trace       | trace         | trace       |
| 3               | Ni(OAc) <sub>2</sub>               | -                | 18.3                | 793.4                | 2905.2        | 86.9        | trace         | trace       | trace         | trace       | 26.7          | 0.8         |
| 4               | Ni(acac) <sub>2</sub>              | -                | 20.4                | 938.8                | 2361.4        | 66.6        | 79.9          | 1.5         | 235.9         | 4.8         | 511.1         | 13.9        |
| 5               | Ni(PPh <sub>3</sub> ) <sub>4</sub> | -                | 15.1                | 362.2                | 793.6         | 43.0        | 36.7          | 1.3         | 120.4         | 4.7         | 305.6         | 15.9        |
| 6               | Ni(COD) <sub>2</sub>               | -                | 16.3                | 477.4                | 1124.96       | 49.0        | 41.2          | 1.2         | 114.0         | 3.6         | 667.4         | 31.0        |
| 7               | Ni(COD)(DQ)                        | -                | 17.8                | 436.0                | trace         | trace       | 176.6         | 6.1         | 576.2         | 22.1        | 1485.5        | 75.9        |
| 8 <sup>a</sup>  | Ni(COD)(DQ)                        | -                | 18.5                | 386.5                | 554.5         | 34.4        | 117.2         | 4.8         | 324.7         | 14.6        | 886.3         | 53.0        |
| 9 <sup>b</sup>  | Ni(COD)(DQ)                        | -                | 16.9                | 600.9                | 2616.1        | 95.4        | 21.6          | 0.5         | 38.7          | 1.0         | 191.8         | 6.7         |
| 10 <sup>c</sup> | Ni(COD)(DQ)                        | -                | 18.3                | 331.0                | 798.8         | 57.2        | 59.6          | 2.8         | 154.6         | 8.0         | 562.1         | 38.9        |
| 11 <sup>d</sup> | Ni(COD)(DQ)                        | -                | 19.5                | 1912.2               | 3986.6        | 52.7        | 299.7         | 2.6         | 975.2         | 9.3         | 2676.9        | 34.1        |
| 12 <sup>e</sup> | Ni(COD)(DQ)                        | -                | 19.6                | 2908.2               | 5331.5        | 46.6        | 568.6         | 3.3         | 1516.9        | 9.6         | 4311.3        | 36.3        |
| 13 <sup>f</sup> | -                                  | DQ               | 17.9                | 415.5                | 1411.8        | 78.9        | 56.2          | 1.0         | 90.4          | 1.8         | 391.2         | 21.0        |
| 14              | -                                  | PPh <sub>3</sub> | 13.0                | 518.9                | 3033.2        | 98.6        | trace         | trace       | trace         | trace       | 33.4          | 1.0         |
| 15              | -                                  | acac             | 12.9                | 587.5                | 3268.1        | 93.1        | trace         | trace       | 73.9          | 1.5         | 181.3         | 5.0         |
| 16 <sup>g</sup> | Ni(COD)(DQ)                        | -                | 17.8                | 1325.3               | -             | -           | -             | -           | 70.3          | 0.9         | -             | -           |
| 17 <sup>h</sup> | -                                  | -                | 18.2                | 1190.7               | -             | -           | -             | -           | 0             | 0           | -             | -           |

**Table S1**– Screen of various conditions using substrate **6**. <sup>a</sup>5 mol% of Ni(COD)(DQ). <sup>b</sup>1 mol% of Ni(COD)(DQ). <sup>c</sup>5 h reaction time. <sup>d</sup>Reaction at 110 °C. <sup>e</sup>Carried out under an atmosphere of air. <sup>f</sup>10 mol% DQ and excluding Ni(COD)(DQ). <sup>g</sup>Reaction carried out in the absence of **6** <sup>h</sup>Reaction carried out in absence of Ni(COD)(DQ) or **6**.

## Deuterated solvent experiments

These reactions were carried as outlined in General procedure B, except that  $d_6$ -benzene (5 mL) was used as solvent.

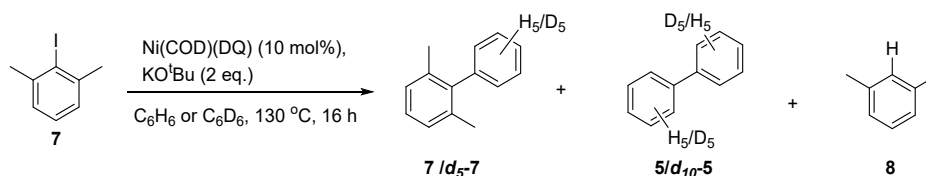

| Entry | Solvent                       | Dodecane added (mg) | Dodecane (peak area) | 6 (peak area) | 6 (%) yield) | 7 (peak area) | 7 (%) yield) | 5 (peak area) | 5 (%) yield) | 8 (peak area) | 8 (%) yield) |
|-------|-------------------------------|---------------------|----------------------|---------------|--------------|---------------|--------------|---------------|--------------|---------------|--------------|
| 1     | C <sub>6</sub> H <sub>6</sub> | 17.8                | 436.0                | trace         | trace        | 176.6         | 6.1          | 576.2         | 22.1         | 1485.5        | 75.9         |
| 2     | C <sub>6</sub> D <sub>6</sub> | 20.1                | 575.0                | 672.7         | 30.4         | 140.9         | 4.2          | 44.3          | 1.5          | 1107.0        | 48.4         |

**Table S2** – GC-FID data for kinetic isotope effect experiments.

## Investigating the source of hydrogen atom abstraction

In this section, the source of abstracted H in xylene product **8** was investigated. Table S3 shows the outcome of the reaction carried out without labelled components (entry 1). Entry 2 shows the effect of adding COD (20 mol%). This did not substantially increase the amount of xylene **8** and so was not a major contributor to the H of xylene.

KO<sup>t</sup>Bu- $d_9$  was then prepared. This was used to test if D atom abstraction from KO<sup>t</sup>Bu- $d_9$  would be observed or if using this isotopologue of KO<sup>t</sup>Bu inhibited the coupling reaction. If so, this would indicate that abstraction of H from KO<sup>t</sup>Bu is important. Table S3 (entry 3) shows the outcome of the coupling reaction using  $d_9$ -KO<sup>t</sup>Bu + C<sub>6</sub>D<sub>6</sub>. This did not lead to deuteration of the xylene product.

To test if the methyl groups of iodo-*m*-xylene underwent hydrogen atom abstraction by xyllyl radicals, we thought to prepare iodo-*m*-xylene- $d_6$ , featuring deuterated methyl groups. However, the synthesis of iodomesitylene- $d_9$  was more convenient, and so this was prepared as a model for iodo-*m*-xylene- $d_6$ .

These reactions were carried out as described in General procedure B, except where stated. Yields were obtained *via* GC-FID (Table S3), while determination of deuterium incorporation was determined by GC-MS.

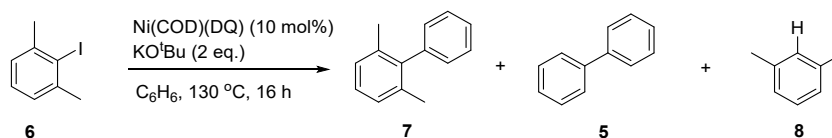

| Entry | Conditions changed      | Dodecane added (mg) | Dodecane (peak area) | 6 (peak area) | 6 (% yield) | 7 (peak area) | 7 (% yield) | 5 (peak area) | 5 (% yield) | 8 (peak area) | 8 (% yield) | Deuteration of 8 observed by GCMS? |
|-------|-------------------------|---------------------|----------------------|---------------|-------------|---------------|-------------|---------------|-------------|---------------|-------------|------------------------------------|
| 1     | -                       | 17.8                | 436.0                | trace         | trace       | 176.6         | 6.1         | 576.2         | 22.1        | 1485.5        | 75.9        | N/A                                |
| 2     | 20 mol % COD            | 17.8                | 1321.4               | 222.4         | 3.9         | 383.6         | 4.4         | 1354.3        | 17.1        | 4590.7        | 77.3        | N/A                                |
| 3     | $d_9$ -KOtBu + $C_6D_6$ | 18.7                | 1056.2               | 551.4         | 12.7        | 339.6         | 5.1         | 164.0         | 2.7         | 2207.9        | 20.6        | No                                 |

**Table S3** – GC-FID data for COD/ $d_9$ -KOtBu experiments.

### Synthesis of $d_9$ -KOtBu

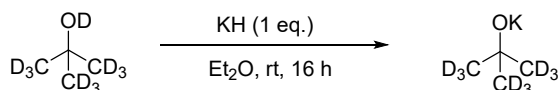

An oven-dried 3-neck round-bottom flask (100 mL) was charged with KH (205 mg, 5.11 mmol) in a glovebox. The flask was removed from the glovebox, cooled to 0 °C in an ice bath and under a flow of Ar, dry Et<sub>2</sub>O (8 mL) was added via syringe. With stirring, dry  $d_{10}$ -Bu<sup>t</sup>OD (0.48 mL, 5.11 mmol) was added dropwise to the stirred slurry. After the addition, the flask was left to stir at 0 °C for 20 min, and then allowed to slowly warm to room temperature and stirred for a further 16 h. The solvent was removed *in vacuo*, yielding an off-white solid. The solid was extracted into dry THF (2 x 5 mL) and concentrated *in vacuo* yielding  $d_9$ -Bu<sup>t</sup>OK as a white solid (431 mg, 3.55 mmol, 70%). The product was characterised by comparison of its <sup>13</sup>C NMR spectrum to the spectra of  $d_{10}$ -Bu<sup>t</sup>OD. The C-O peak shifts from δ 57.37 ppm to 66.2 ppm, and the CD<sub>3</sub> peak shifts from δ 30.5 ppm to 33.6 ppm. <sup>2</sup>H NMR (61 MHz, THF) δ 1.04 (br). <sup>13</sup>C NMR (101 MHz,  $d_8$ -THF) δ 66.2, 34.2 – 33.0 (m).

### Synthesis of $d_9$ -mesitylene S3<sup>6</sup>

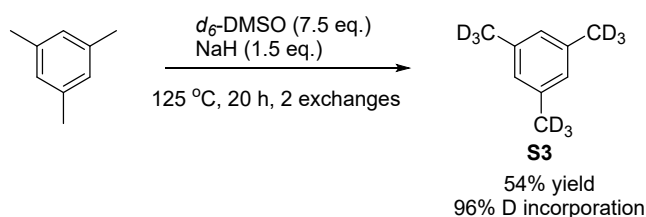



NaH (540 mg, 22.5 mmol) was added to a 3-necked round-bottomed flask (100 mL) and evacuated. The flask was placed under Ar, then mesitylene (1.80 g, 15 mmol) and  $d_6$ -DMSO (9.47 g, 113 mmol) were added *via* syringe and stirred to give a pale slurry. A condenser was fitted to the flask under Ar flow and the reaction was slowly heated to 125°C, gradually changing to a dark brown. After 20 h the reaction was allowed to cool to room temperature. The volatiles were then removed by vacuum distillation at 100 °C and collected in a trap cooled in liquid nitrogen. This distillate was washed with water (4 x 25 mL) and the upper mesitylene layer was recovered. The exchange was repeated with fresh  $d_6$ -DMSO and NaH. After vacuum distillation and washing with H<sub>2</sub>O the product **S3** was recovered as a pale-yellow liquid (1.06 g, 8.18 mmol, 54%). Analysis by <sup>1</sup>H NMR showed a deuterium incorporation of 96%. <sup>2</sup>H NMR showed deuterium incorporation on the methyl groups only. <sup>2</sup>H NMR spectrum shows deuterium incorporation as mesitylene- $d_9$  (a trace of a minor peak at 2.07 ppm likely arises from mesitylene- $d_8$ ). The signals in the IR spectrum between 2060 – 2230 cm<sup>-1</sup> are due to the benzylic C-D bonds, confirmed by comparison to non-deuterated mesitylene. <sup>1</sup>H NMR (400 MHz, C<sub>6</sub>D<sub>6</sub>) δ 6.72 (s, 3H), 2.15 – 2.12 (m, 0.4H). <sup>13</sup>C NMR (101 MHz, C<sub>6</sub>D<sub>6</sub>) δ 137.5, 127.4, 21.1 – 19.9 (m). <sup>2</sup>H NMR (61 MHz, C<sub>6</sub>H<sub>6</sub>) δ 2.09 (br), 2.07 (br). IR  $v_{max}/cm^{-1}$  (neat): 3013, 2924, 2230, 2203, 2127, 2064, 1603, 1443. *m/z* (EI): 129.1 [M]<sup>+</sup>, 111.1, 96.1, 81.1.

### Synthesis of $d_9$ - nitromesitylene **S4**<sup>7</sup>

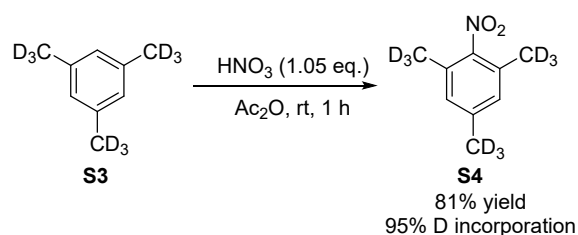

A solution of conc. HNO<sub>3</sub> (0.4 mL, 3.7 mmol) and acetic anhydride (2.0 mL) was cooled in an ice bath and added dropwise to a stirred solution of **S3** (426 mg, 3.3 mmol) and acetic anhydride (1.0 mL) under air, also cooled in an ice bath, quickly turning the solution from colourless to orange. After addition, the solution was allowed to warm to room temperature and stirred for a further 1 h. An aqueous K<sub>2</sub>CO<sub>3</sub> solution was added until slightly basic, and then the product was precipitated in ice-water. The precipitate was vacuum filtered, washed with more ice-water and dried *in vacuo* yielding pale-yellow crystals of **S4** (465 mg, 2.67 mmol, 81%). A signal at 1724 cm<sup>-1</sup> in the IR spectrum indicates traces of acetic acid are present in the product. <sup>1</sup>H NMR (400 MHz, CDCl<sub>3</sub>) δ 6.91 (s, 2H), 2.28 (quin, 2.2 Hz,

0.15H), 2.25 (quin, 2.2 Hz, 0.27H).  $^{13}\text{C}$  NMR (101 MHz,  $\text{CDCl}_3$ )  $\delta$  139.7, 129.0, 128.9, 20.0 – 19.3 (m), 16.8 – 15.8 (m).  $^2\text{H}$  NMR (61 MHz,  $\text{CHCl}_3$ )  $\delta$  2.29 (s, 3D), 2.26 (s, 6D) IR  $\nu_{\text{max}}/\text{cm}^{-1}$  (neat): 2924, 2870, 2853, 2233, 2112, 2064, 1724, 1599, 1508, 1364.  $m/z$  (EI): 174.1 ( $[\text{M}]^+$ ), 156.1, 144.1, 128.1, 96.1, 81.0.

### Synthesis of $d_9$ -1,3,5-trimethylaniline **S5**

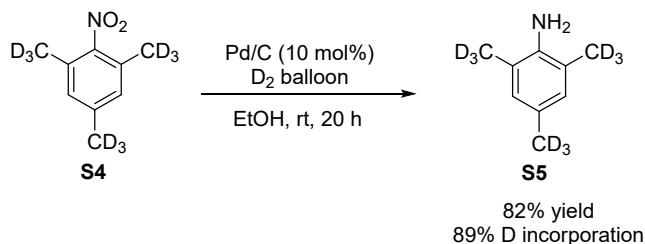

Nitroarene **S4** (465 mg, 2.67 mmol) and 20% Pd/C (188 mg, 0.267 mmol) were added to a 3-necked round-bottomed flask (250 mL) and evacuated. The flask was placed under Ar flow and degassed ethanol (20 mL) was added. With vigorous stirring, the Ar atmosphere was replaced with  $\text{D}_2$  from a balloon. The reaction was left to stir vigorously for 20 h under an atmosphere of  $\text{D}_2$ . The reaction mixture was then filtered through a short plug of Celite, washed with EtOAc and the concentrated *in vacuo* yielding **S5** as a pale-yellow oil (301 mg, 2.19 mmol, 82 %).  $^1\text{H}$  NMR showed a fall in deuterium incorporation to 89%, and also showed that the *ortho*-methyl groups are more labelled than the *para*-methyl group (93% vs 81%). Splitting of peaks in the  $^2\text{H}$  NMR spectrum is due to the presence of minor isotopomers.  $^1\text{H}$  NMR (400 MHz,  $\text{CDCl}_3$ )  $\delta$  6.82 (s, 2H), 3.44 (br, 2H), 2.27 – 2.22 (m, 0.56H), 2.19 – 2.17 (m, 0.45H).  $^{13}\text{C}$  NMR (101 MHz,  $\text{CDCl}_3$ )  $\delta$  140.2, 128.8, 126.8, 121.6, 20.3 – 19.3 (m), 17.3 – 16.5 (m).  $^2\text{H}$  NMR (61 MHz,  $\text{CHCl}_3$ )  $\delta$  2.23 (br), 2.19 (br), 2.14 (br).  $m/z$  (EI): 144.1 ( $[\text{M}]^+$ ), 125.1, 111.1, 95.0, 80.0, 67.0.

### Synthesis of $d_9$ -2-iodomesitylene **S6**<sup>8</sup>

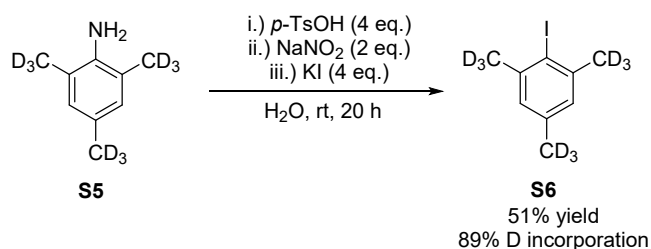

A solution of NaNO<sub>2</sub> (302 mg, 4.38 mmol) in H<sub>2</sub>O (4 mL) was slowly added dropwise to a stirred suspension of **S5** (301 mg, 2.19 mmol) and *p*-TsOH (1.67 g, 8.76 mmol) in H<sub>2</sub>O (6 mL) under air at 0°C, yielding a colourless solution that was left to stir for a further 10 min. A solution of KI (1.45 g, 8.76 mmol) in H<sub>2</sub>O (4 mL) was added slowly dropwise, which upon the first addition yielded a dark purple solution that persisted once half the KI solution had been added. Once the addition was complete, the dark purple solution was allowed to slowly warm to room temperature and stirred for a further 20 h. The reaction was then extracted with EtOAc (3 x 5 mL), the combined organic fractions were then washed with sat. Na<sub>2</sub>S<sub>2</sub>O<sub>3</sub> (10 mL) and H<sub>2</sub>O (5 mL) twice, then with H<sub>2</sub>O (10 mL). The organic fractions were then dried over MgSO<sub>4</sub>, filtered and concentrated *in vacuo*. The crude product was then purified by column chromatography with hexane eluent to yield **S6** as a crystalline white solid (284 mg, 1.11 mmol, 51 %). Splitting of peaks in the <sup>2</sup>H NMR spectrum is due to the presence of minor isotopomers. <sup>1</sup>H NMR (400 MHz, CDCl<sub>3</sub>) δ 6.88 (s, 2H), 2.43 – 2.37 (m, 0.44H), 2.24 – 2.19 (m, 0.56H). <sup>13</sup>C NMR (101 MHz, CDCl<sub>3</sub>) δ 141.8, 137.4, 128.1, 104.3, 29.2 – 28.3 (m), 20.8 – 19.8 (m). <sup>2</sup>H NMR (61 MHz, CHCl<sub>3</sub>) δ 2.43 (br), 2.41 (br), 2.24 (br), 2.21 (br). IR  $\nu_{max}/\text{cm}^{-1}$  (neat): 3026, 2922, 2228, 2204, 2106, 2062, 1572, 1410, 1271, 1001. *m/z* (EI): 255.1 ([M]<sup>+</sup>), 127.1, 109.0, 96.1, 81.0, 68.0. HRMS Found: 255.0454. C<sub>9</sub>H<sub>2</sub>D<sub>9</sub>I<sup>+</sup> (M<sup>+</sup>) requires 255.0465 (deviation 4.3 ppm). (Ref 8 describes the synthesis of the corresponding non-deuterated compound. Our data are consistent with the data in that paper).

### Reaction employing substrate **S6**

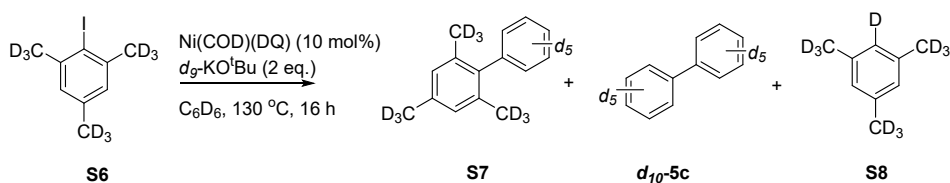

This reaction was carried out as described in General Procedure B, except substrate **S6**, *d*<sub>6</sub>-benzene and *d*<sub>9</sub>-KO<sup>t</sup>Bu were employed. The crude reaction mixture was analysed by GC-MS, in which coupled product **S7** and **S8** were observed, along with trace amounts of *d*<sub>10</sub>-**5c**, with the majority of the starting material **S6** remaining unconsumed (Figure S2).

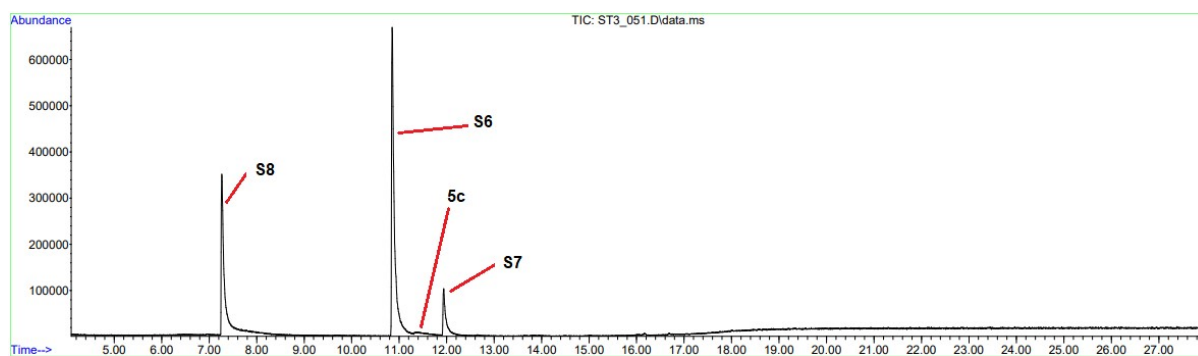

**Figure S2** – GC-MS spectrum of crude reaction mixture for coupling reaction of substrate **S6**.

Due to the incomplete deuteration of substrate **S6**, determining whether deuterium atom abstraction by the mesityl radical to form **S8** had occurred was impossible by mass spectrometry, and thus  $^2\text{H}$  NMR was employed. Analysis of the reaction mixture by  $^2\text{H}$  NMR shows a signal at  $\delta$  6.86 ppm (Figure S3), which corresponds to Ar-D position of compound **S8**, indicating that deuterium atom abstraction has occurred, from the benzylic positions of **S6**. An analogous reaction was carried out using non-deuterated iodomesitylene (with  $\text{C}_6\text{H}_6$  and  $\text{KO}^t\text{Bu}$ ), giving mostly mesitylene and biphenyl as product with small quantities of heterocoupled mesitylbenzene product. The  $^1\text{H}$  NMR of the crude reaction mixture shows a peak at  $\delta$  6.81 ppm corresponding to the Ar-H position of mesitylene (Figure S4), supporting the assignment of the  $\text{Ar}^{\text{Mes}}\text{-D}$  peak in Figure S3. The  $^1\text{H}$  NMR spectrum of commercial non-deuterated mesitylene is provided for reference, showing a peak at  $\delta$  6.83 ppm (Figure S5), and the  $^1\text{H}$  NMR for our synthesised  $d_9$ -mesitylene shows the same peak at  $\delta$  6.72 ppm (in  $\text{C}_6\text{D}_6$ ). The literature value for the  $^2\text{H}$  NMR spectrum of  $d_3$ -mesitylene ( $1,3,5\text{-C}_6\text{Me}_3\text{D}_3$ ) gives a value of  $\delta$  7.02 ppm,<sup>12</sup> which is expected to be shifted further downfield than **S8** as the longer benzylic C-H bond length (compared to C-D) makes  $\text{CH}_3$  a less inductively donating group. Based on these facts the signal at  $\delta$  6.86 ppm in Figure S3 corresponds to deuterated **S8**, resulting from deuterium atom abstraction by the mesityl radical from the benzylic positions of **S6**.

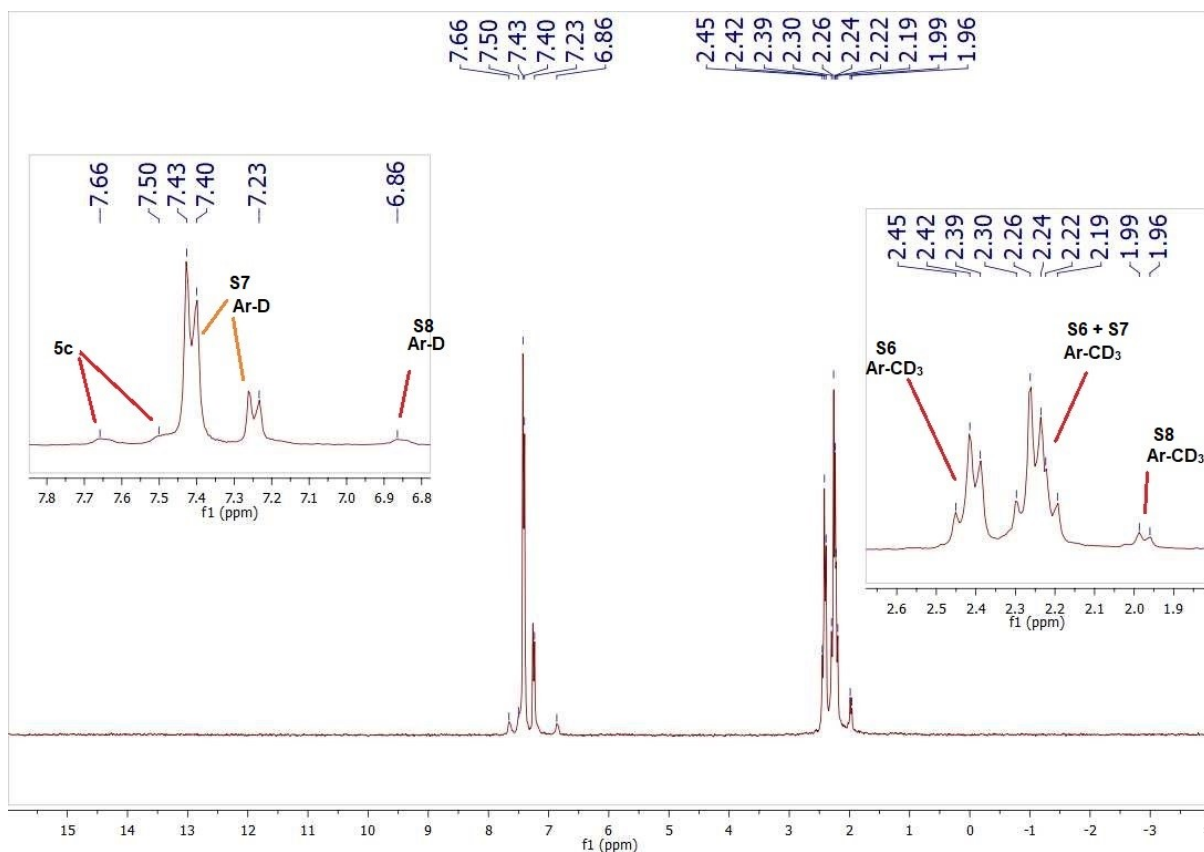

Figure S3 –  $^2\text{H}$  NMR ( $\text{CHCl}_3$ ) spectra of crude reaction mixture for coupling reaction of substrate S6.

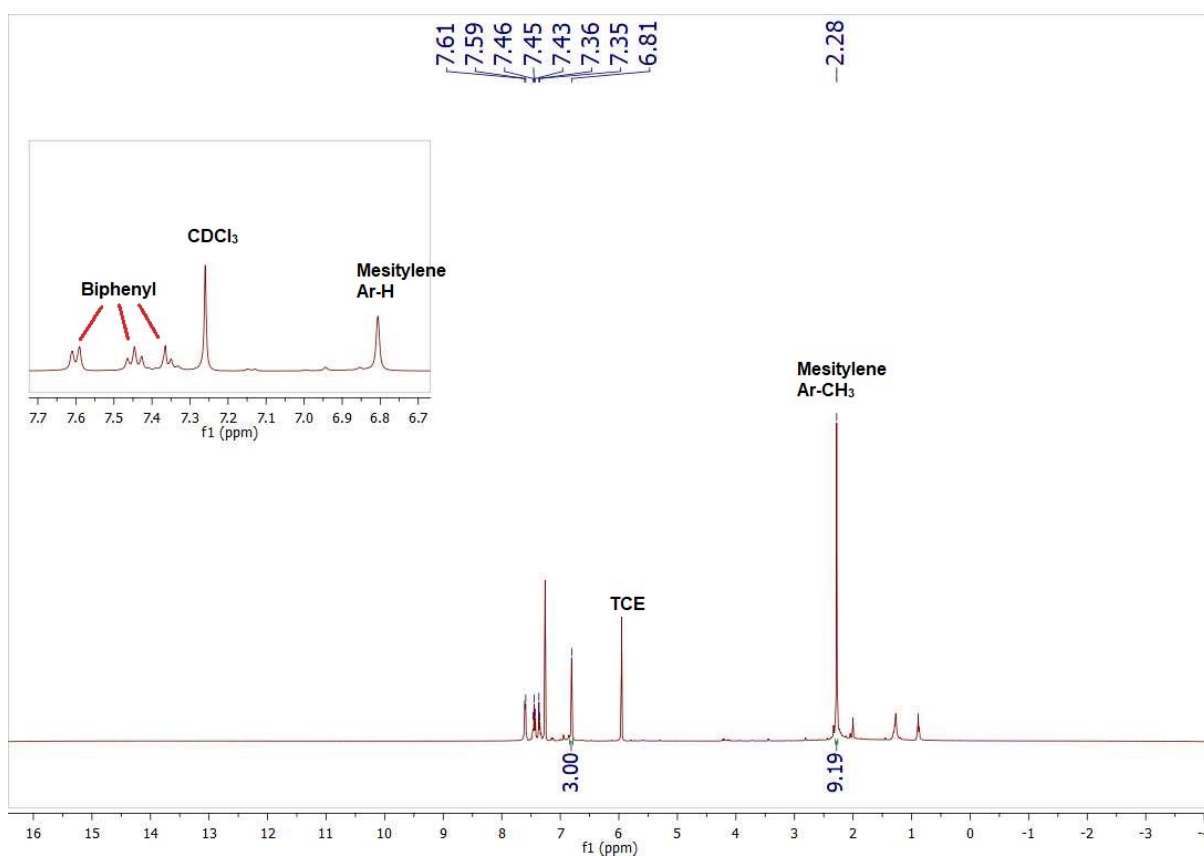

Figure S4 –  $^1\text{H}$  NMR ( $\text{CDCl}_3$ ) spectrum of crude reaction mixture for coupling reaction of non-deuterated iodomesitylene. TCE = 1,1,2,2-tetrachloroethane

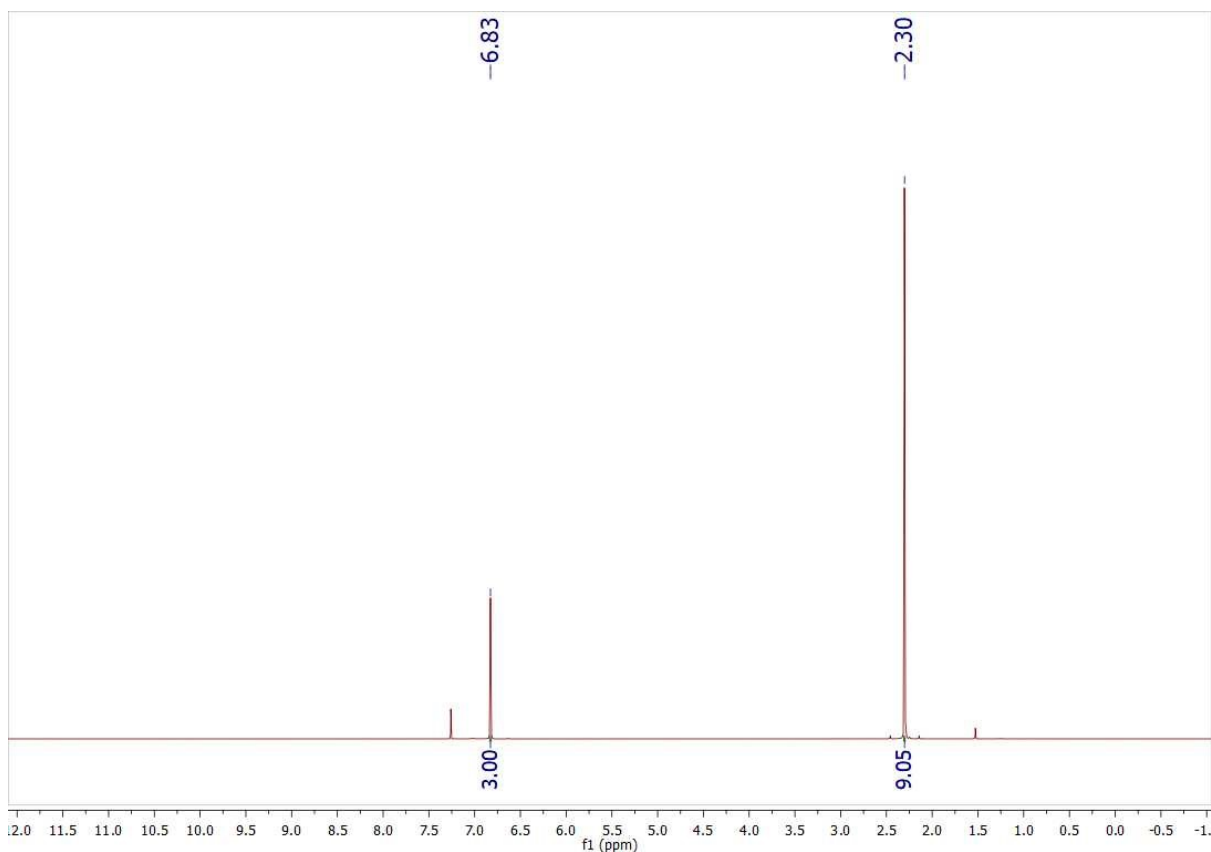

Figure S5 –  $^1\text{H}$  NMR ( $\text{CDCl}_3$ ) spectrum of non-deuterated mesitylene.

## Radical scavenging experiments with TEMPO

These reactions were carried out as outlined in General Procedure B, except radical scavenger TEMPO was added (54.7 mg, 0.35 mmol or 328 mg, 2.1 mmol).

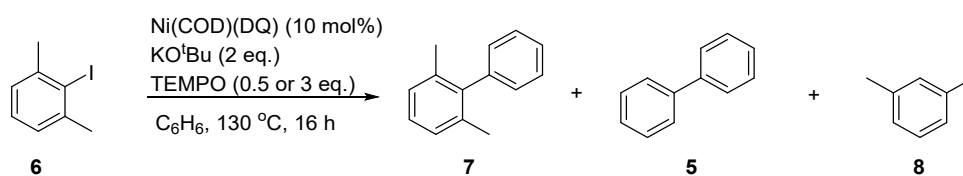

| Entry | TEMPO   | Dodecane added (mg) | Dodecane (peak area) | 6 (peak area) | 6 (% yield) | 7 (peak area) | 7 (% yield) | 5 (peak area) | 5 (% yield) | 8 (peak area) | 8 (% yield) |
|-------|---------|---------------------|----------------------|---------------|-------------|---------------|-------------|---------------|-------------|---------------|-------------|
| 1     | -       | 17.8                | 436.0                | trace         | trace       | 176.6         | 6.1         | 576.2         | 22.1        | 1485.5        | 75.9        |
| 2     | 0.5 eq. | 19.5                | 1327.1               | 1379.2        | 26.3        | 229.3         | 2.9         | 490.1         | 6.8         | 1634.5        | 30.0        |
| 3     | 3.0 eq. | 17.9                | 428.7                | 1507.7        | 81.7        | trace         | trace       | trace         | trace       | trace         | trace       |

Table S4 – GC-FID for reactions with added TEMPO.

## GC-FID calibration information

To obtain yields for inseparable mixtures of compounds **6**, **7**, **5** and **8**, calibration curves were constructed for each compound using GC-FID using *n*-dodecane as an internal standard. Authentic

samples of compounds **6**, **5** and **8** were bought from commercial sources, while compound **7** was synthesised using the procedure outlined above and corrected for the homocoupled impurity **S1**. To construct each calibration curve, known amounts of each compound (approximately 0.01 mmol – 0.1 mmol) were mixed with a known amount of dodecane (approximately 0.1 mmol). The mixtures were then diluted with CHCl<sub>3</sub> and analysed on the GC-FID to obtain the peak area for both the sample compound (SC) and dodecane internal standard (IS). Calibration curves were constructed by plotting:

$$\frac{mmol(SC)}{mmol(IS)} \text{ vs. } \frac{area(SC)}{area(IS)}$$

The plots are forced through the origin, with the gradient representing the response factor (RF) for each compound against *n*-dodecane. To obtain the composition of relevant reaction mixtures from these curves, a known mass of dodecane was added to the reaction mixture, an aliquot of which was then removed, diluted with CHCl<sub>3</sub> and analysed by GC-FID. The peak areas for each compound were then input into the following equation to obtain the moles of **6**, **7**, **5** and **8**:

$$\frac{area(SC) * mmol(IS)}{area(IS) * RF} = mmol(SC)$$

| Entry | Mass of <b>8</b> (mg) | mmol of <b>8</b> | Mass dodecane (mg) | mmol dodecane | mmol ratio | Area of <b>8</b> | Area Dodecane | Area ratio |
|-------|-----------------------|------------------|--------------------|---------------|------------|------------------|---------------|------------|
| 1     | 2.1                   | 0.0198           | 18.8               | 0.1100        | 0.1800     | 12578.9          | 98487.2       | 0.1277     |
| 2     | 8.6                   | 0.0810           | 17.6               | 0.1030        | 0.7864     | 42401.7          | 84773.8       | 0.5001     |
| 3     | 11.0                  | 0.1040           | 17.9               | 0.1050        | 0.9904     | 18433.6          | 26890.0       | 0.6855     |
| 4     | 33.2                  | 0.3130           | 18.2               | 0.1070        | 2.9252     | 32922.7          | 16190.1       | 2.0335     |
| 5     | 84.6                  | 0.7970           | 17.4               | 0.1020        | 7.8137     | 40651.0          | 7618.8        | 5.3356     |
| 6     | 105.8                 | 0.9970           | 17.2               | 0.1010        | 9.8712     | 36894.7          | 5652.2        | 6.5274     |

**Table S5** – Calibration curve data for *m*-xylene **8**.

| Entry | Mass of <b>5</b> (mg) | mmol of <b>5</b> | Mass dodecane (mg) | mmol dodecane | mmol ratio | Area of <b>5</b> | Area Dodecane | Area ratio |
|-------|-----------------------|------------------|--------------------|---------------|------------|------------------|---------------|------------|
| 1     | 2.1                   | 0.0136           | 15.2               | 0.0892        | 0.1524     | 9428.4           | 68957.4       | 0.1367     |

|   |           |            |      |        |        |         |         |        |
|---|-----------|------------|------|--------|--------|---------|---------|--------|
| 2 | 7.5       | 0.048<br>6 | 14.4 | 0.0845 | 0.5751 | 33761.9 | 65096.8 | 0.5186 |
| 3 | 16.0      | 0.104<br>0 | 14.7 | 0.0863 | 1.2050 | 19101.4 | 18326.8 | 1.0422 |
| 4 | 47.2      | 0.306<br>0 | 14.7 | 0.0863 | 3.5457 | 34515.8 | 11200.1 | 3.0817 |
| 5 | 109.<br>9 | 0.713<br>0 | 15.6 | 0.0916 | 7.7838 | 37752.0 | 5400.0  | 6.9911 |

**Table S6** – Calibration curve data for biphenyl 5.

| Entry | Mass of sample (mg) | mmol of 7 | Mass dodecane (mg) | mmol dodecane | mmol ratio | Area of 7 | Area Dodecane | Area ratio |
|-------|---------------------|-----------|--------------------|---------------|------------|-----------|---------------|------------|
| 1     | 2.0                 | 0.0104    | 18.0               | 0.106         | 0.0982     | 6115.4    | 62881.5       | 0.0972     |
| 2     | 7.8                 | 0.0406    | 19.9               | 0.117         | 0.3470     | 12765.3   | 36554.7       | 0.3492     |
| 3     | 15.3                | 0.0796    | 17.5               | 0.103         | 0.7733     | 16138     | 20688.2       | 0.7800     |
| 4     | 44.1                | 0.2296    | 18.9               | 0.111         | 2.0685     | 22237.2   | 10923.1       | 2.0357     |
| 5     | 94.5                | 0.4920    | 17.9               | 0.105         | 4.6857     | 32072.9   | 6931          | 4.6274     |

**Table S7** – Calibration curve data for 2,6-dimethylbiphenyl 7, with correction for impurity of S1.

| Entry | Mass of 6 (mg) | mmol of 6 | Mass dodecane (mg) | mmol dodecane | mmol ratio | Area of 6 | Area Dodecane | Area ratio |
|-------|----------------|-----------|--------------------|---------------|------------|-----------|---------------|------------|
| 1     | 6.1            | 0.0263    | 16.4               | 0.0962        | 0.2734     | 11457.0   | 59542.4       | 0.1924     |
| 2     | 9.3            | 0.0401    | 17.1               | 0.100         | 0.4010     | 12907.3   | 48829.4       | 0.2643     |
| 3     | 21.7           | 0.0935    | 16.9               | 0.0992        | 0.9425     | 16799.3   | 27416.6       | 0.6127     |
| 4     | 50.8           | 0.219     | 16.4               | 0.0963        | 2.2741     | 27341.3   | 18276.5       | 1.4960     |
| 5     | 87.5           | 0.377     | 17.4               | 0.102         | 3.6961     | 29666.8   | 12433.8       | 2.3860     |
| 6     | 133.1          | 0.574     | 15.9               | 0.0933        | 6.1522     | 40482.1   | 10198.2       | 3.9695     |

**Table S8** – Calibration curve data for 2,6-dimethyiodobenzene 6.



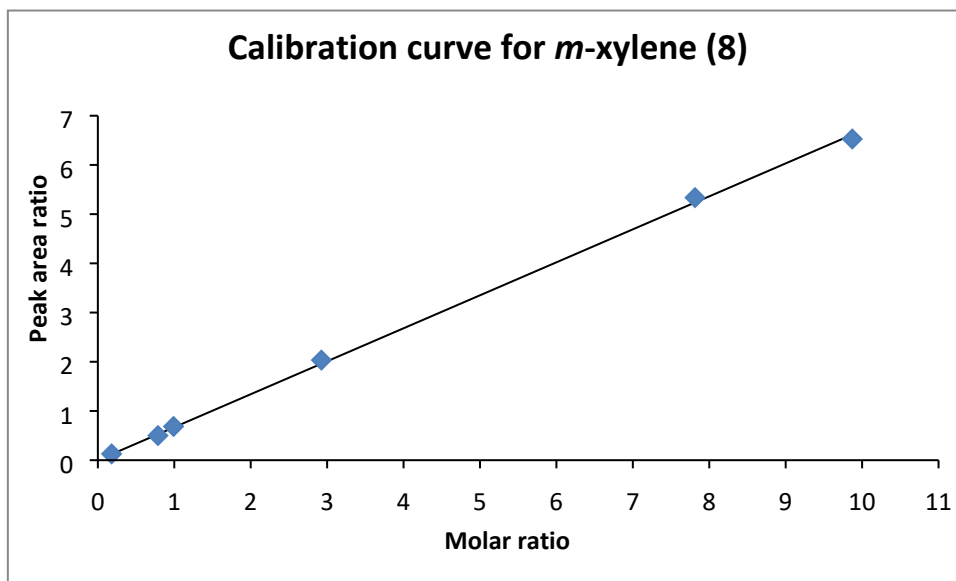

**Figure S10** – GC-FID calibration curve for *m*-xylene **8**.

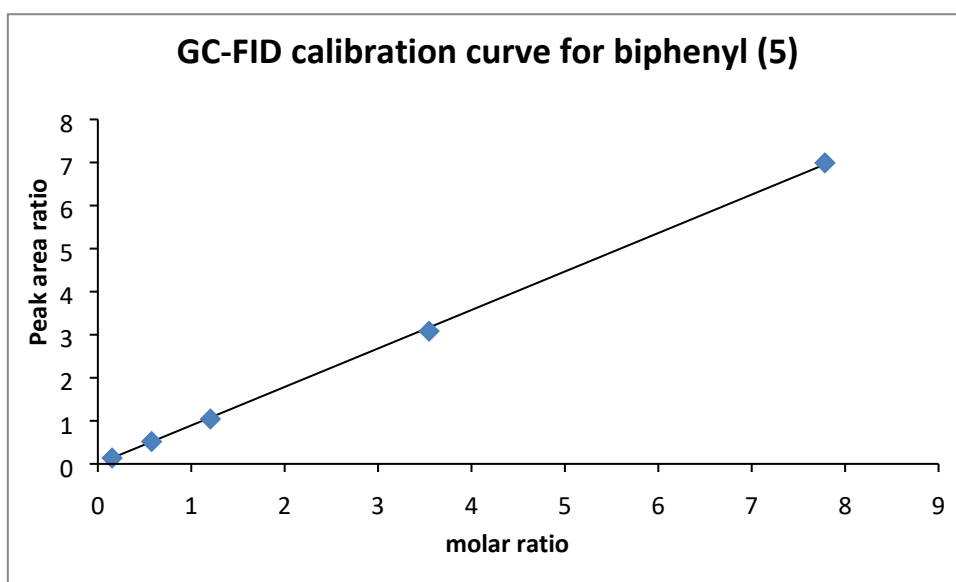

**Figure S11** – GC-FID calibration curve for biphenyl **5**.

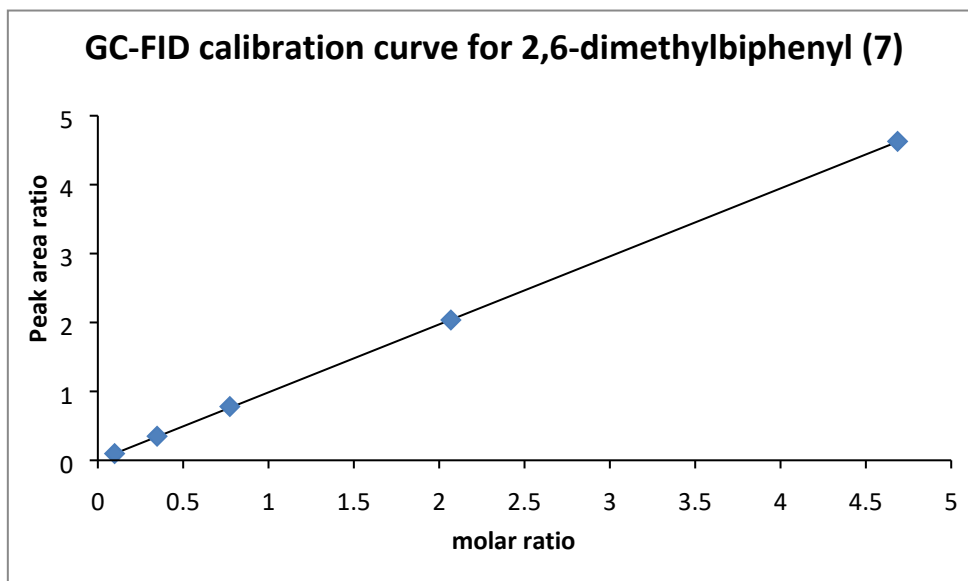

*Figure S12 – GC-FID calibration curve for 2,6-dimethylbiphenyl 7.*

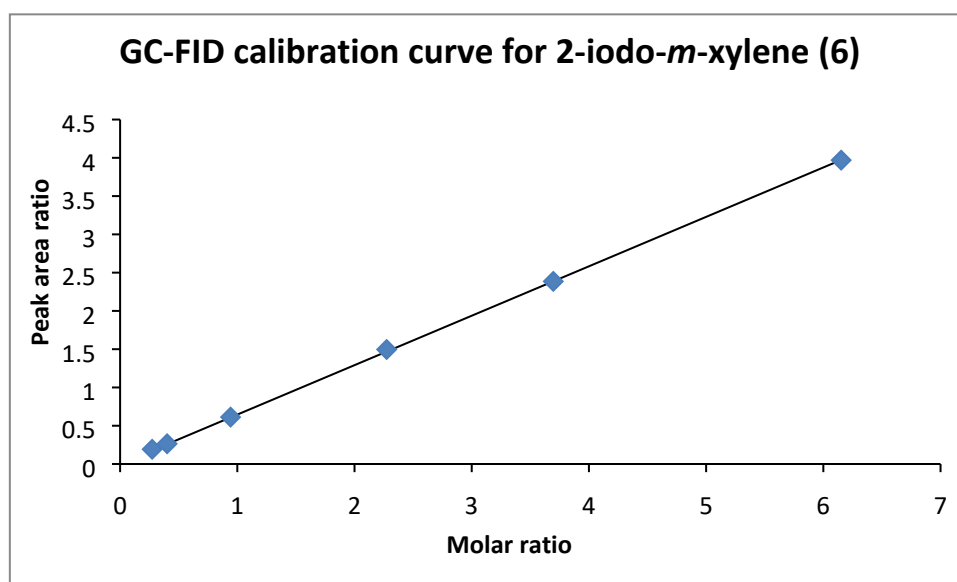

*Figure S13– GC-FID calibration curve for 2,6-dimethyliodobenzene 6*

**NMR spectra**

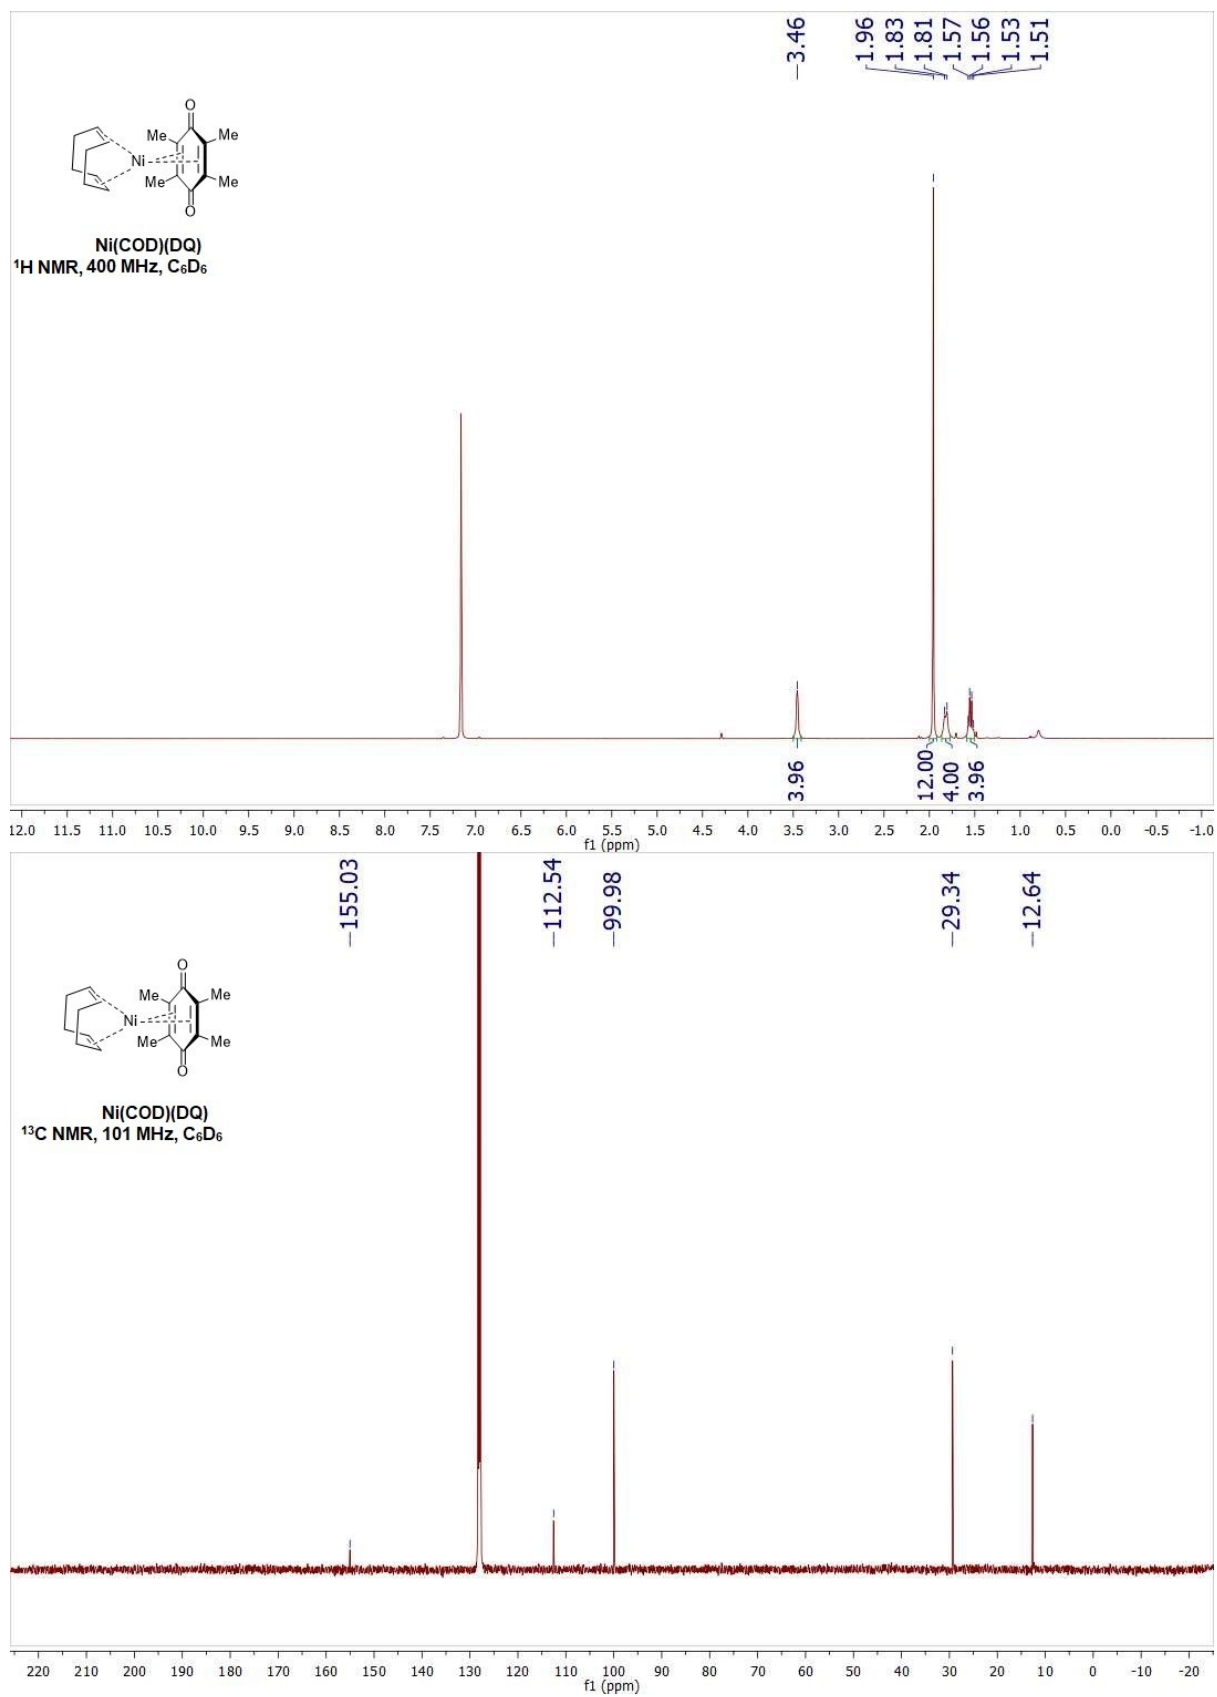

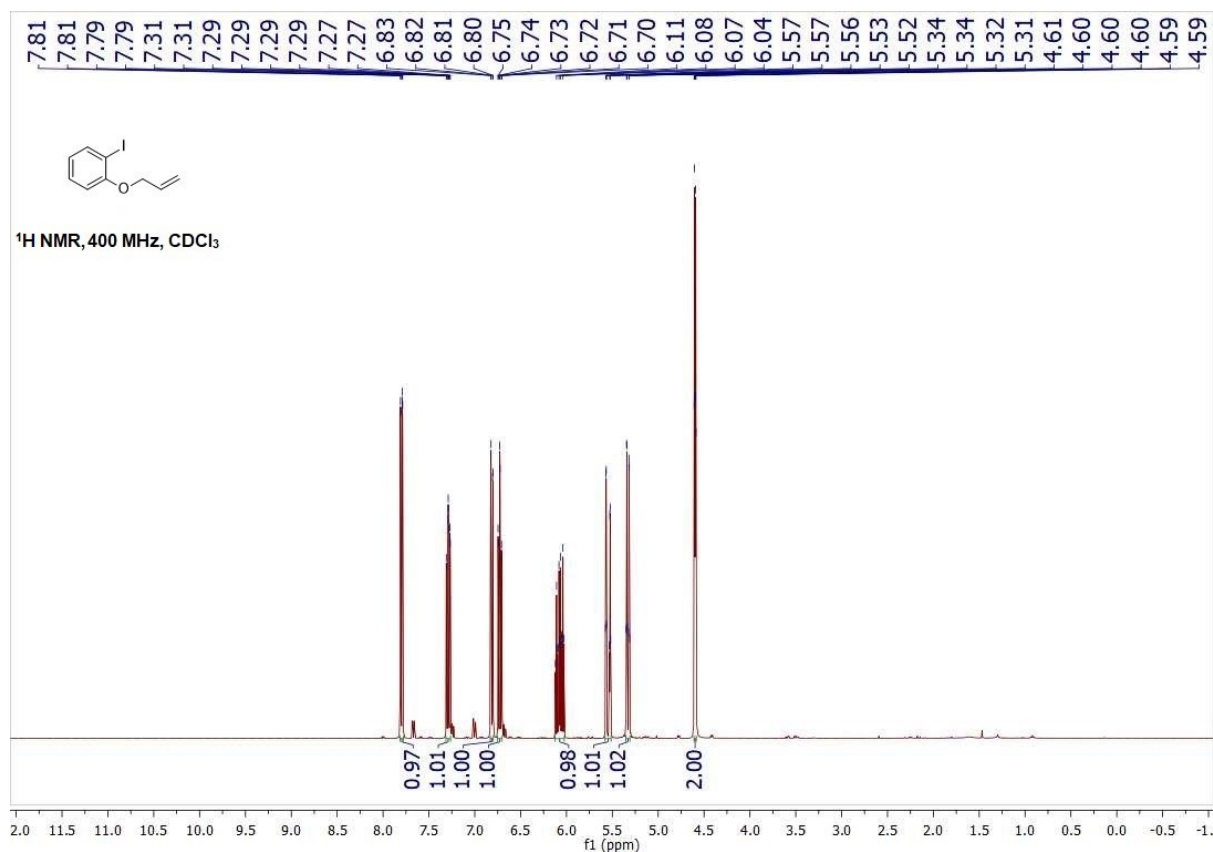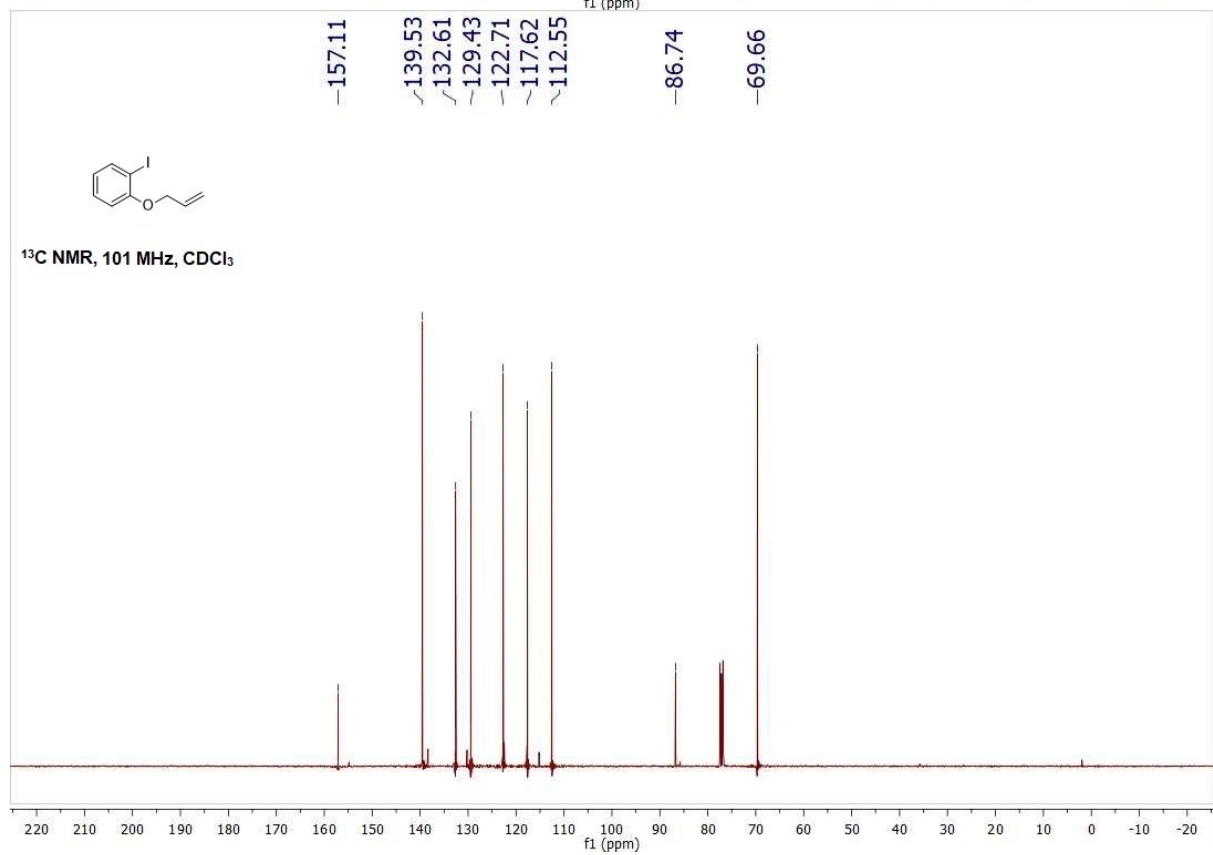

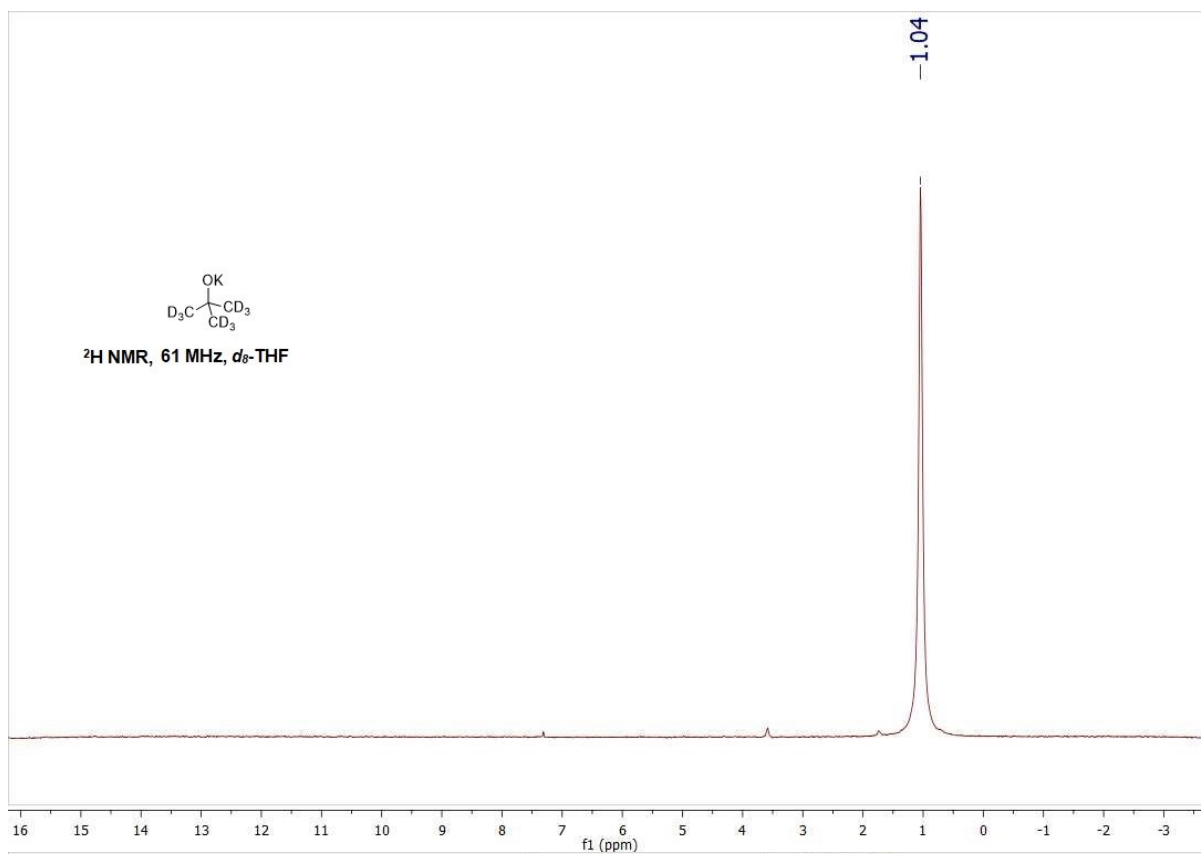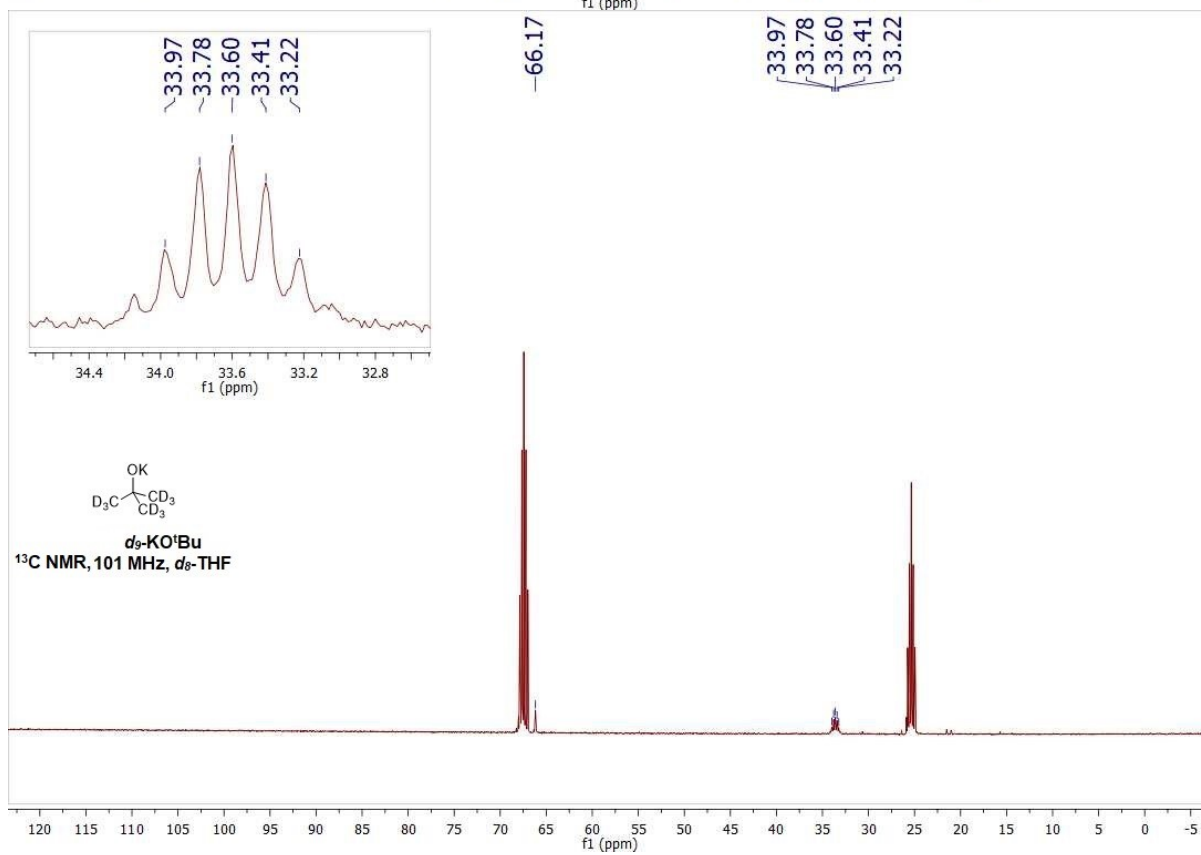

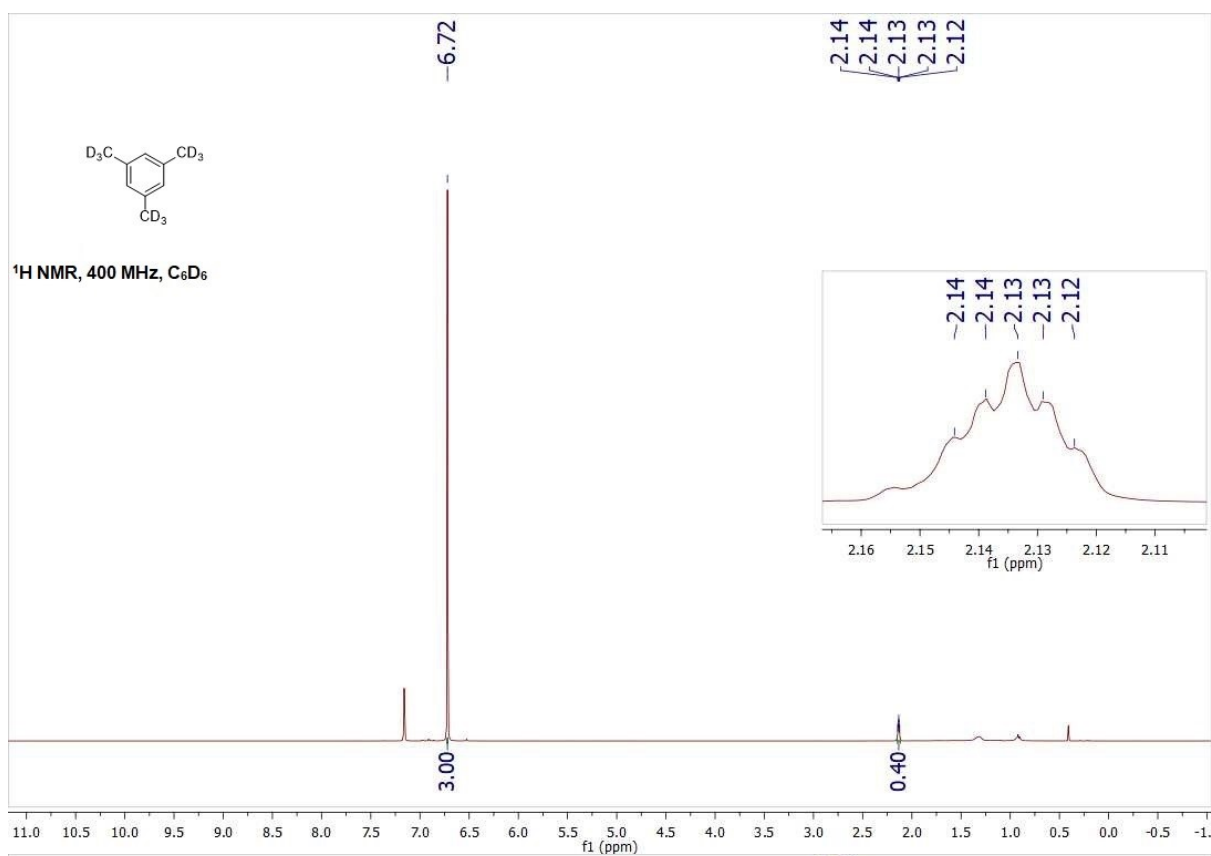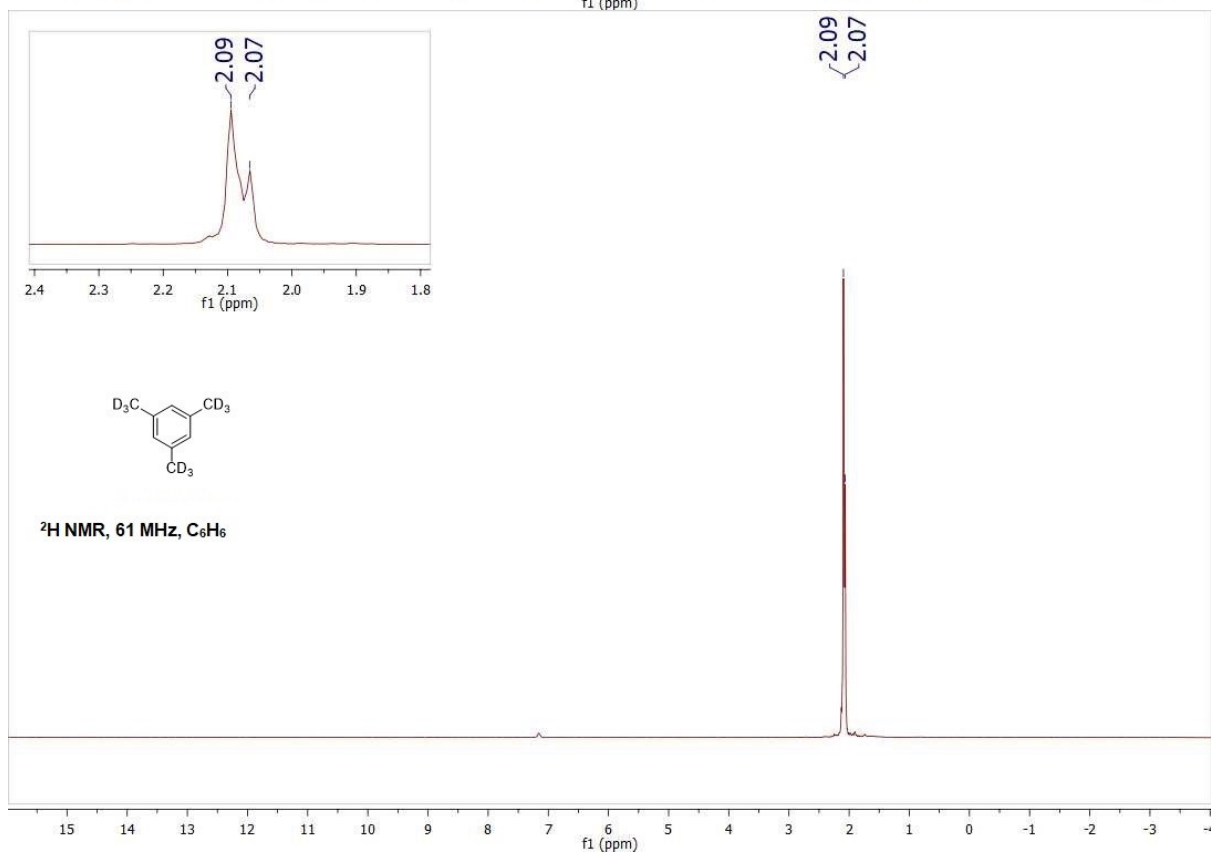

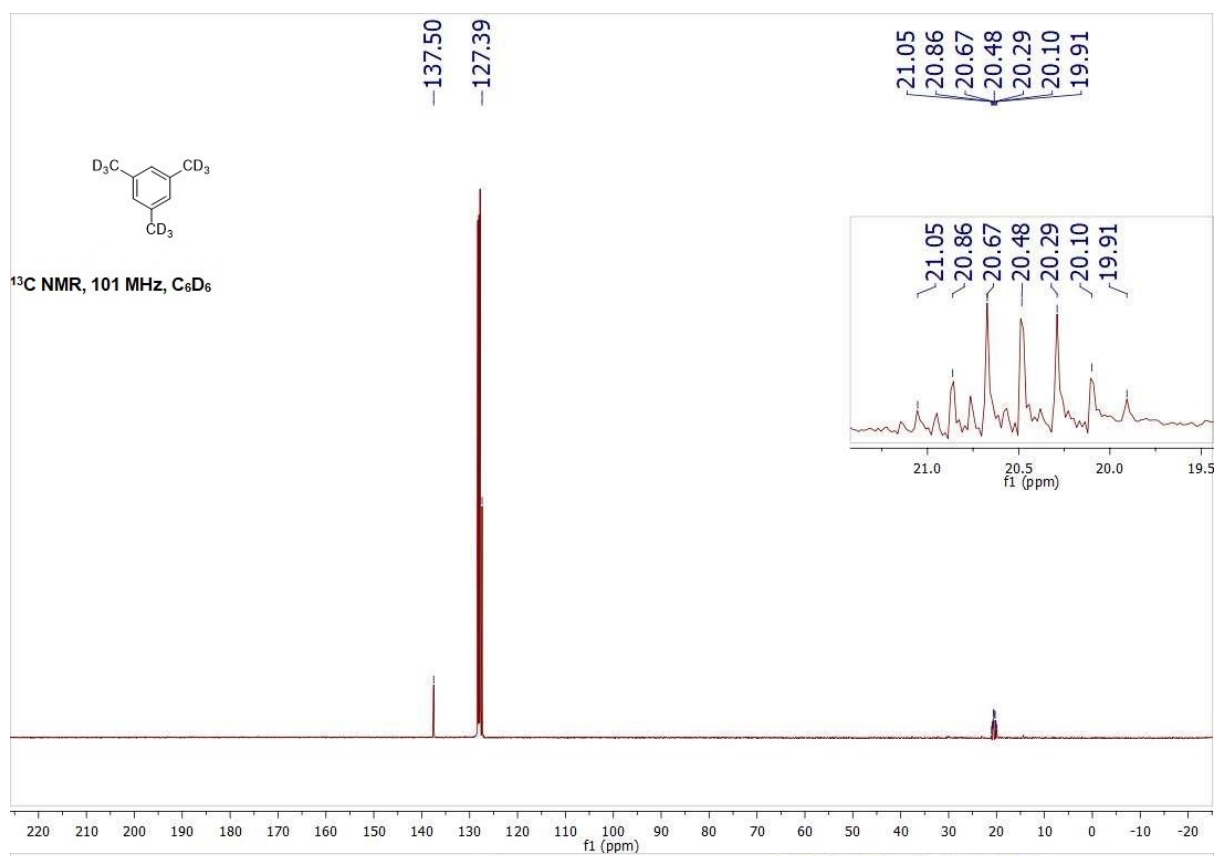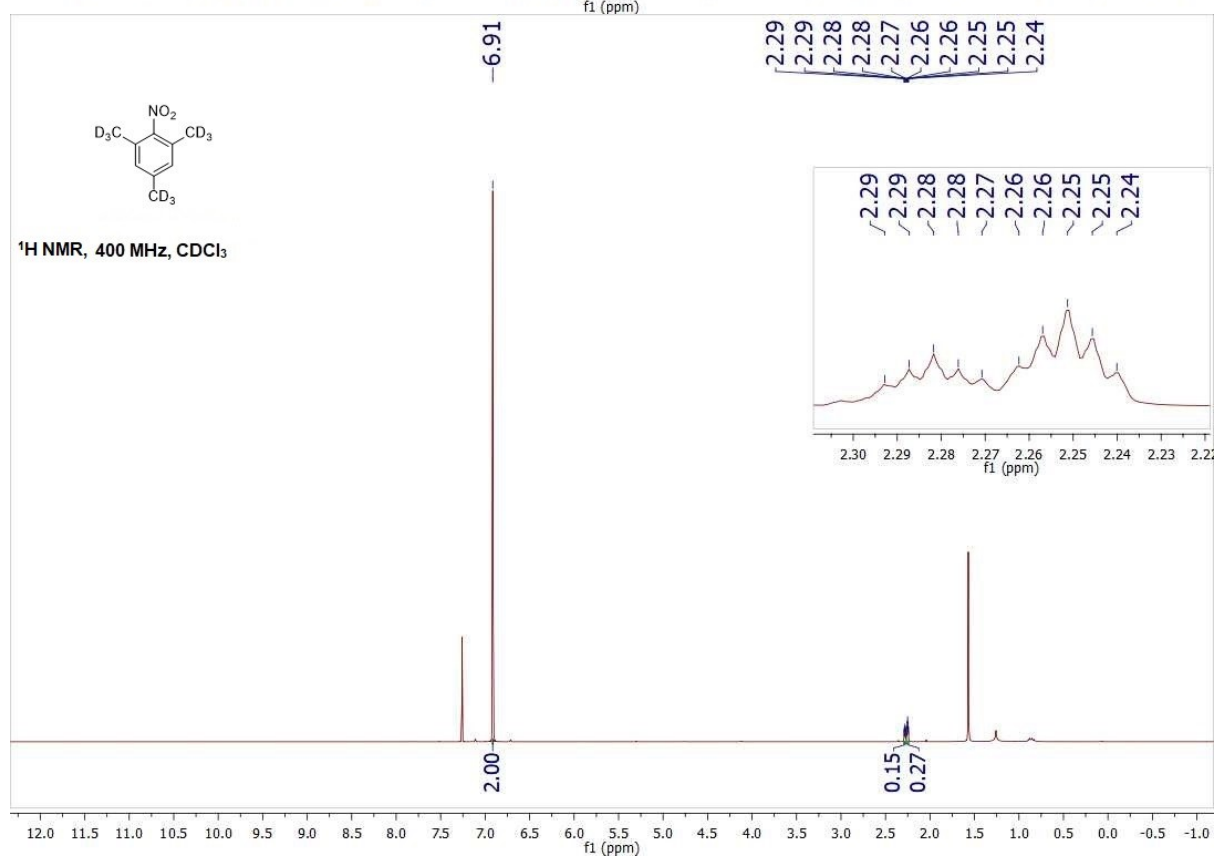



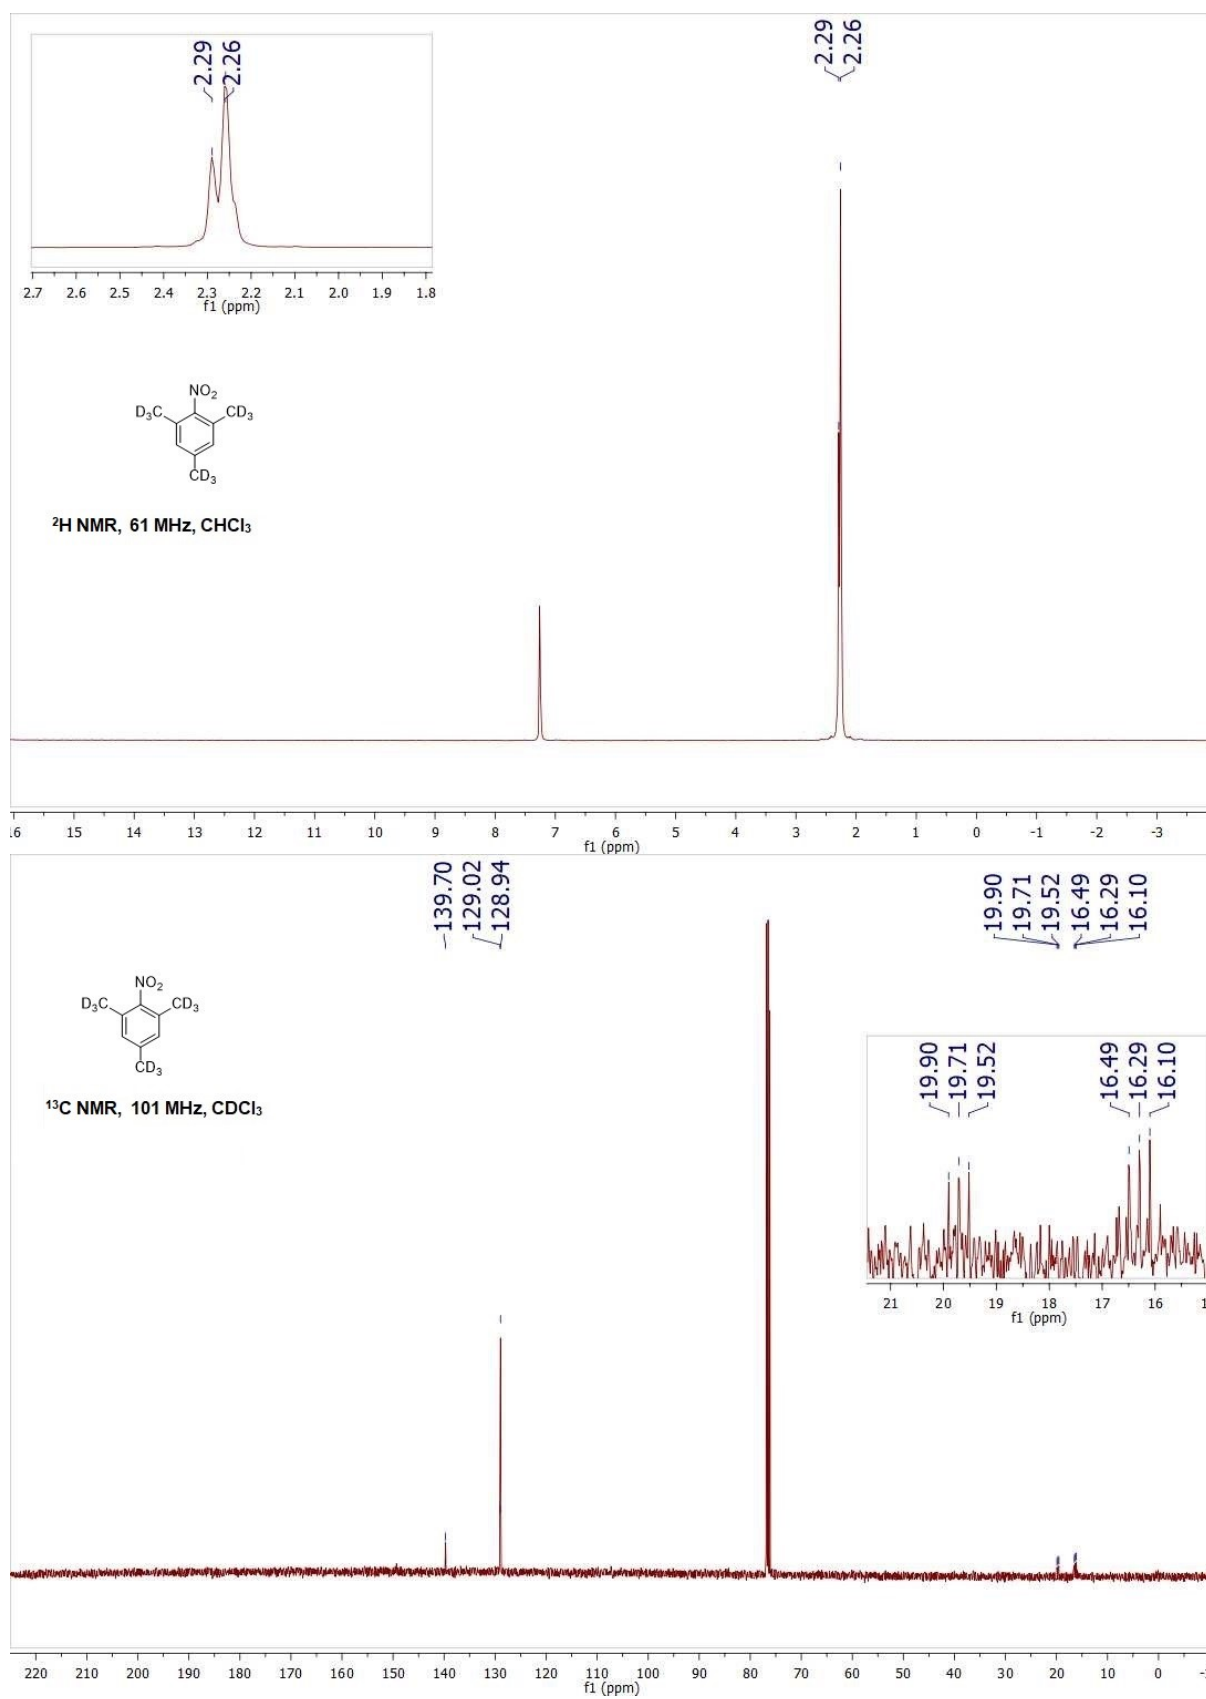

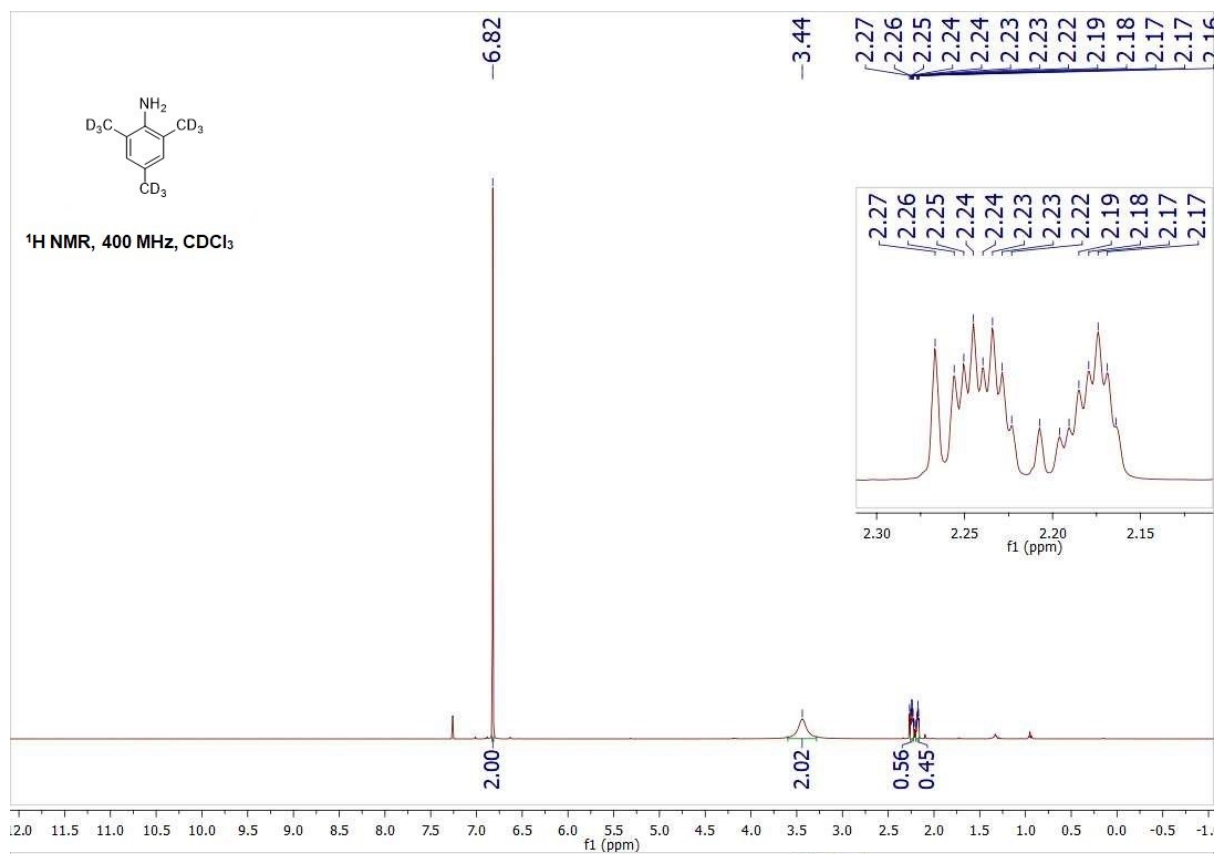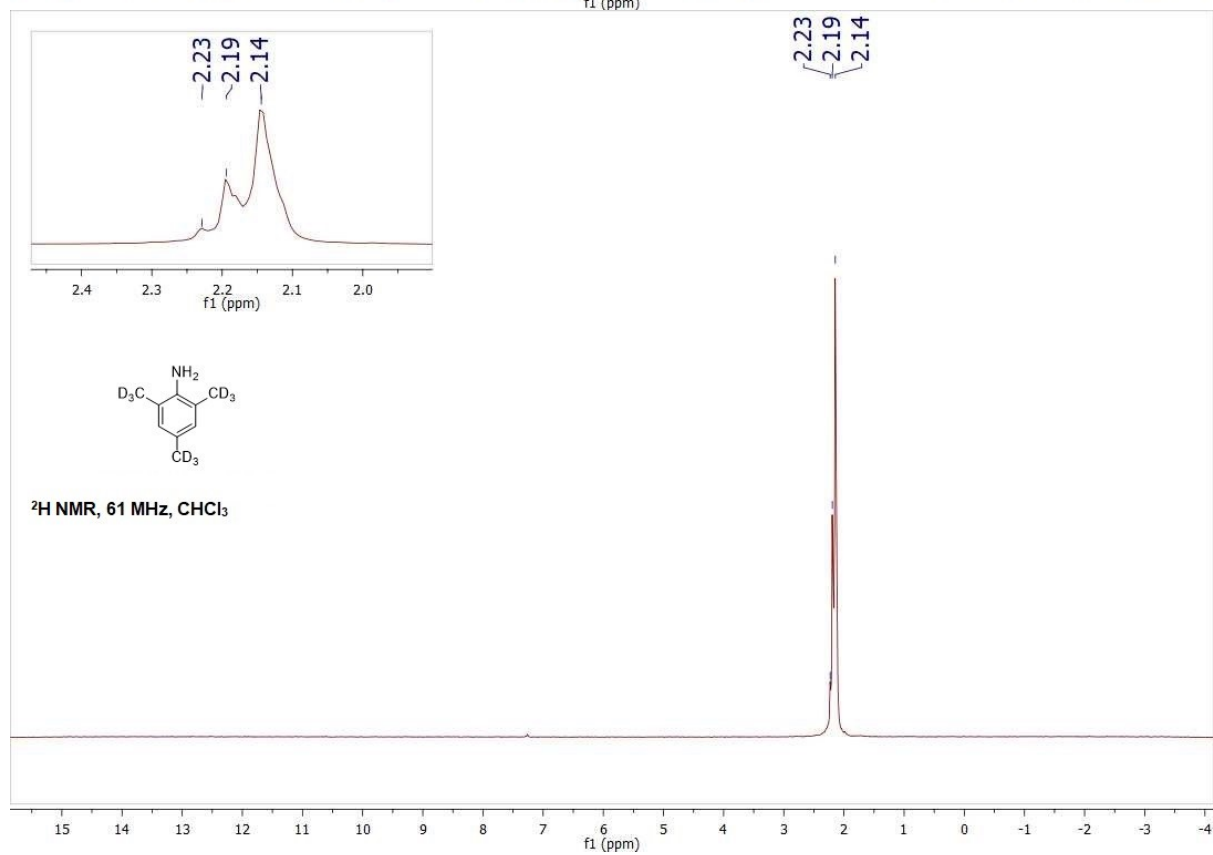

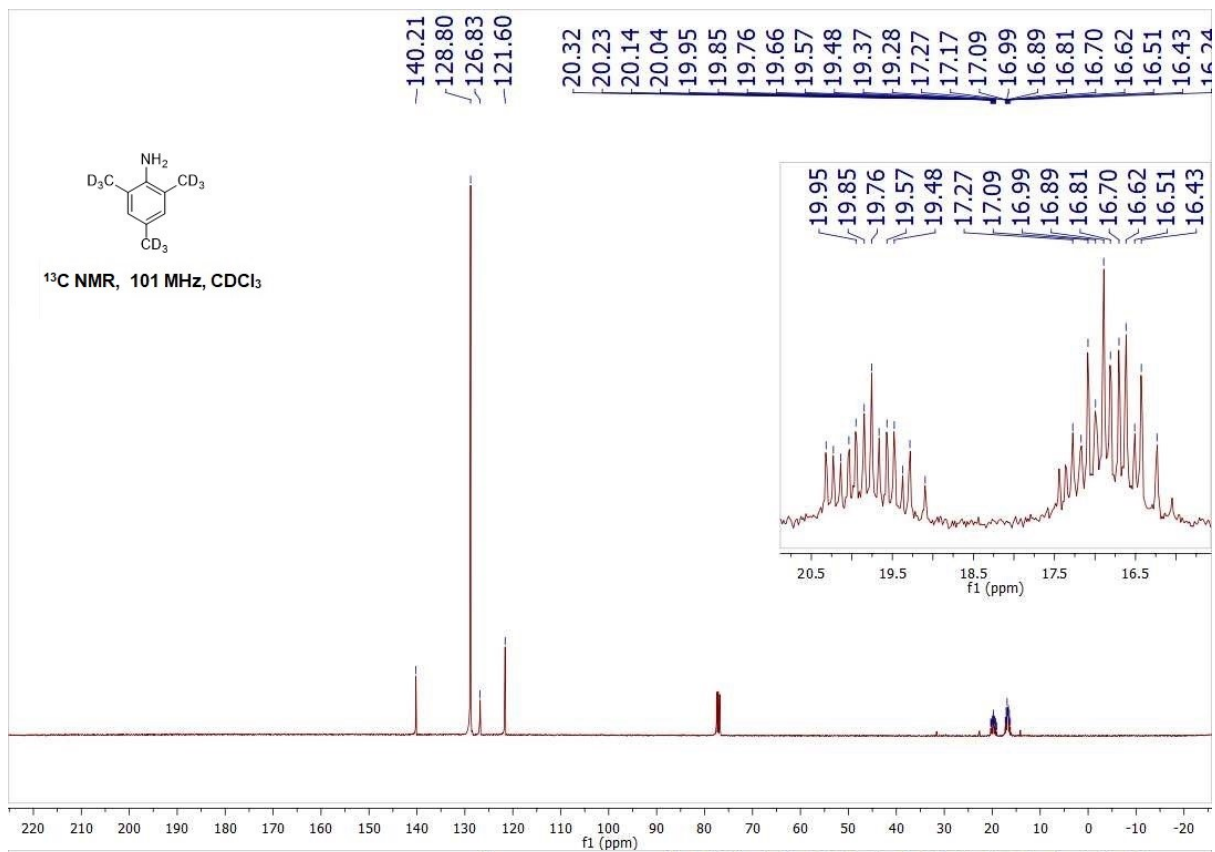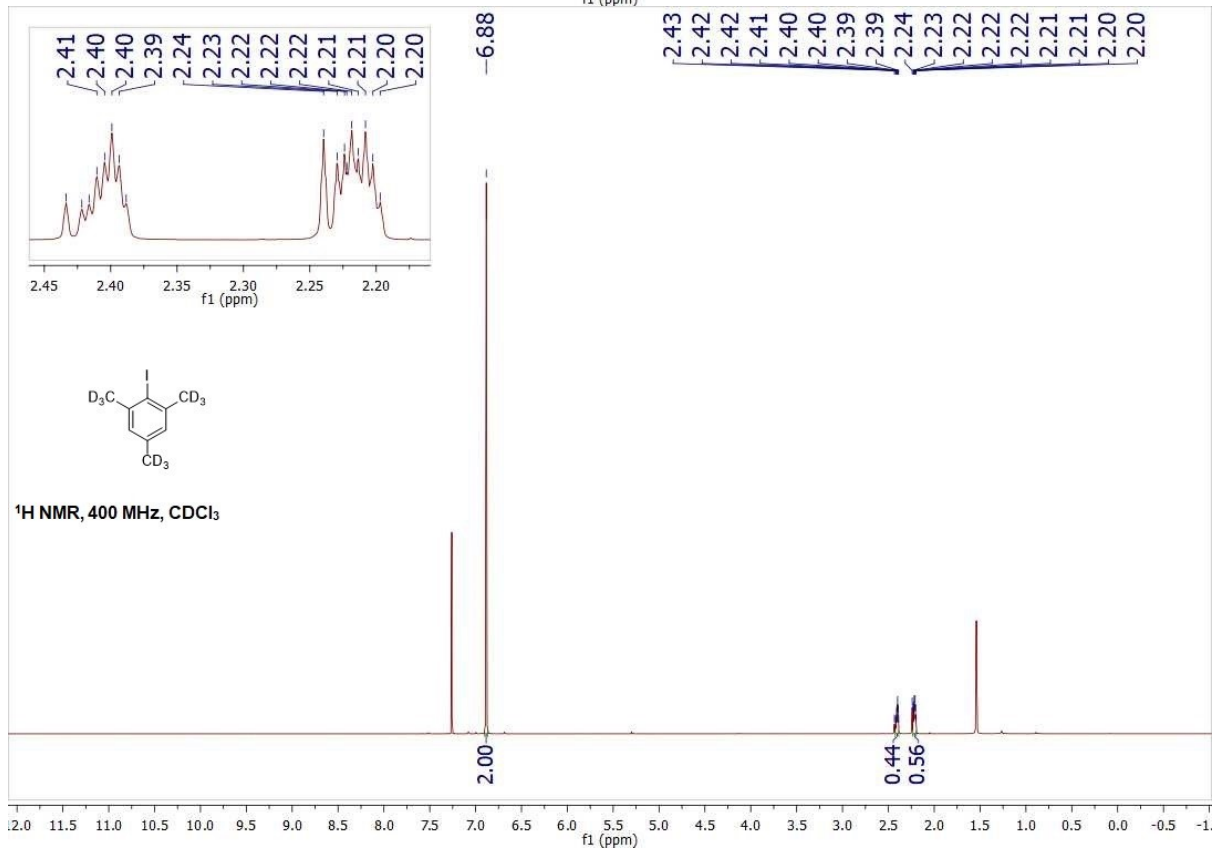

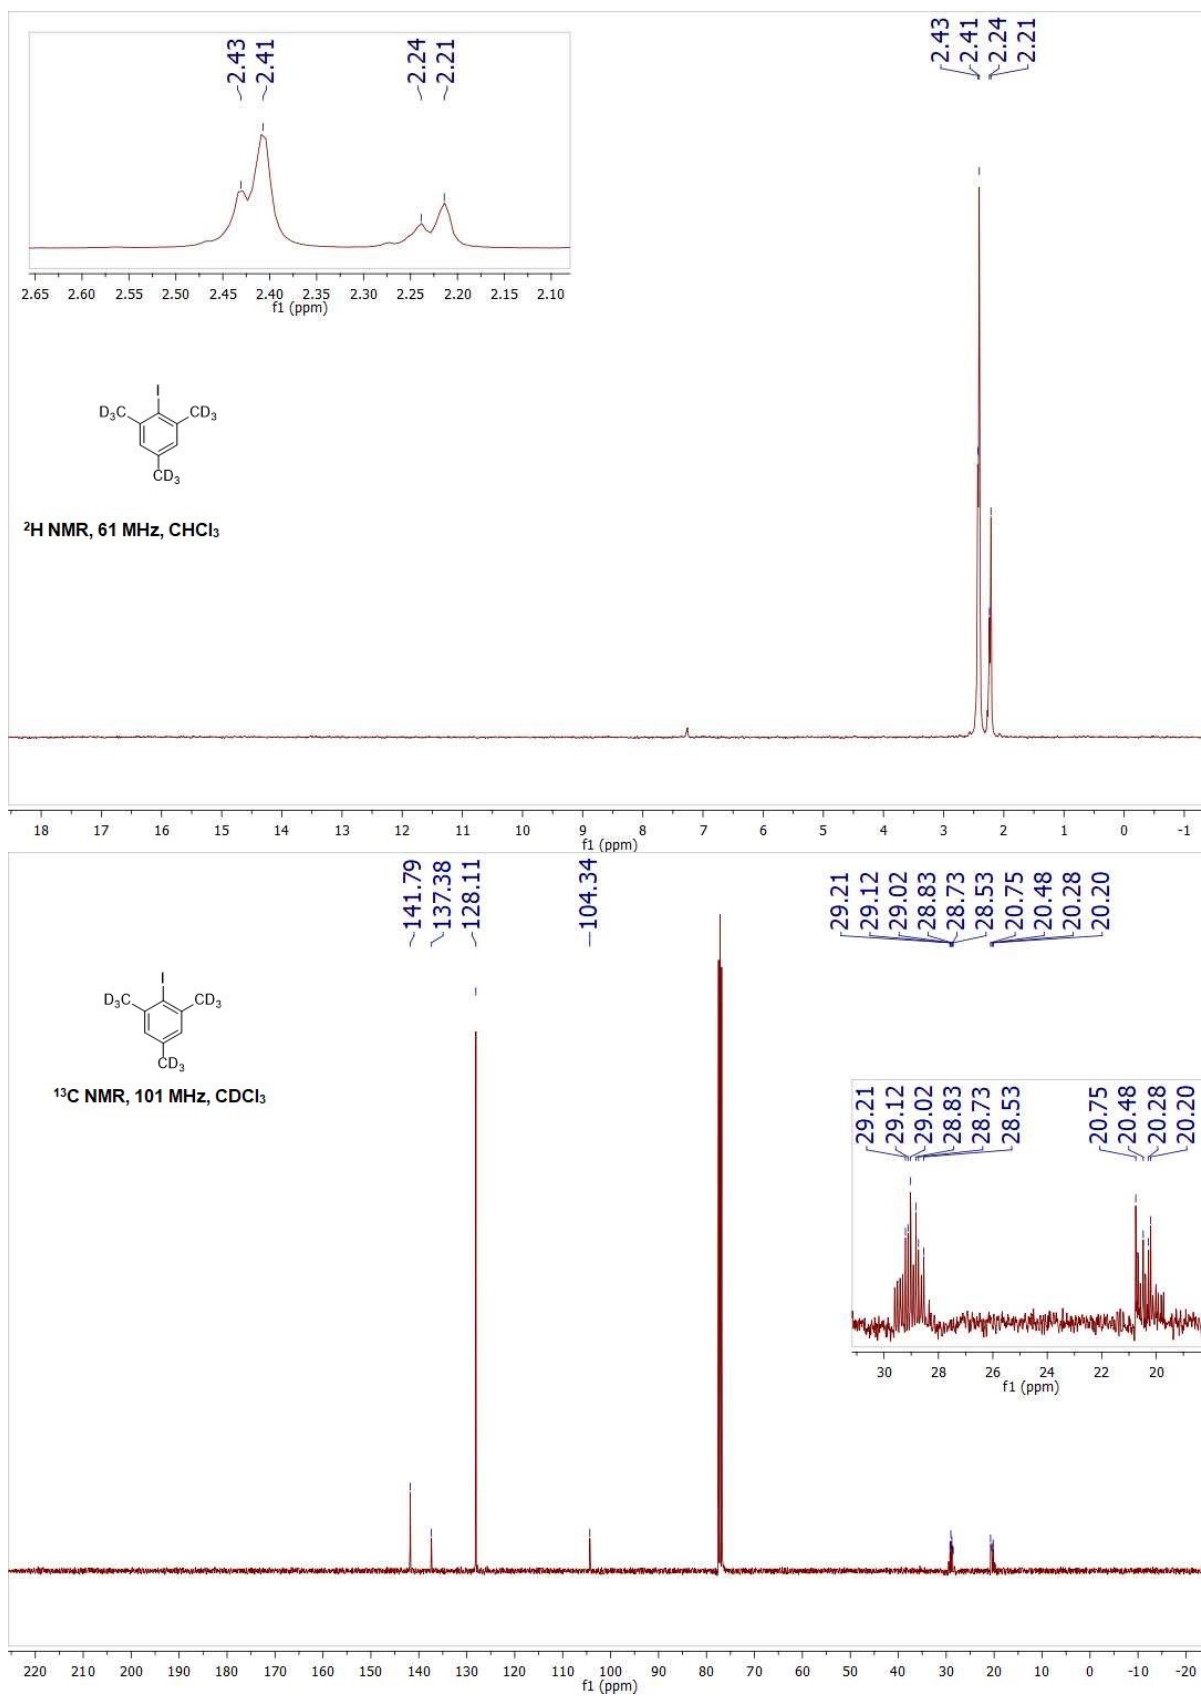

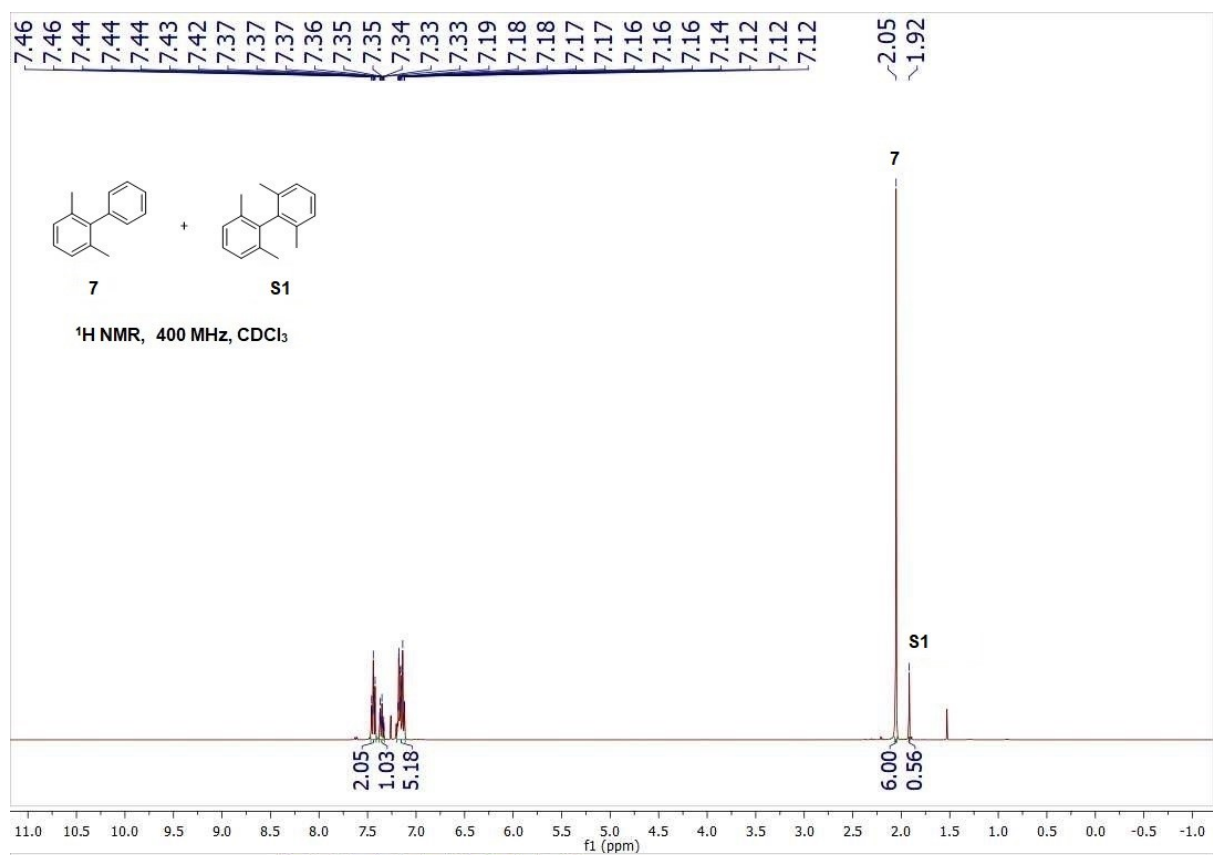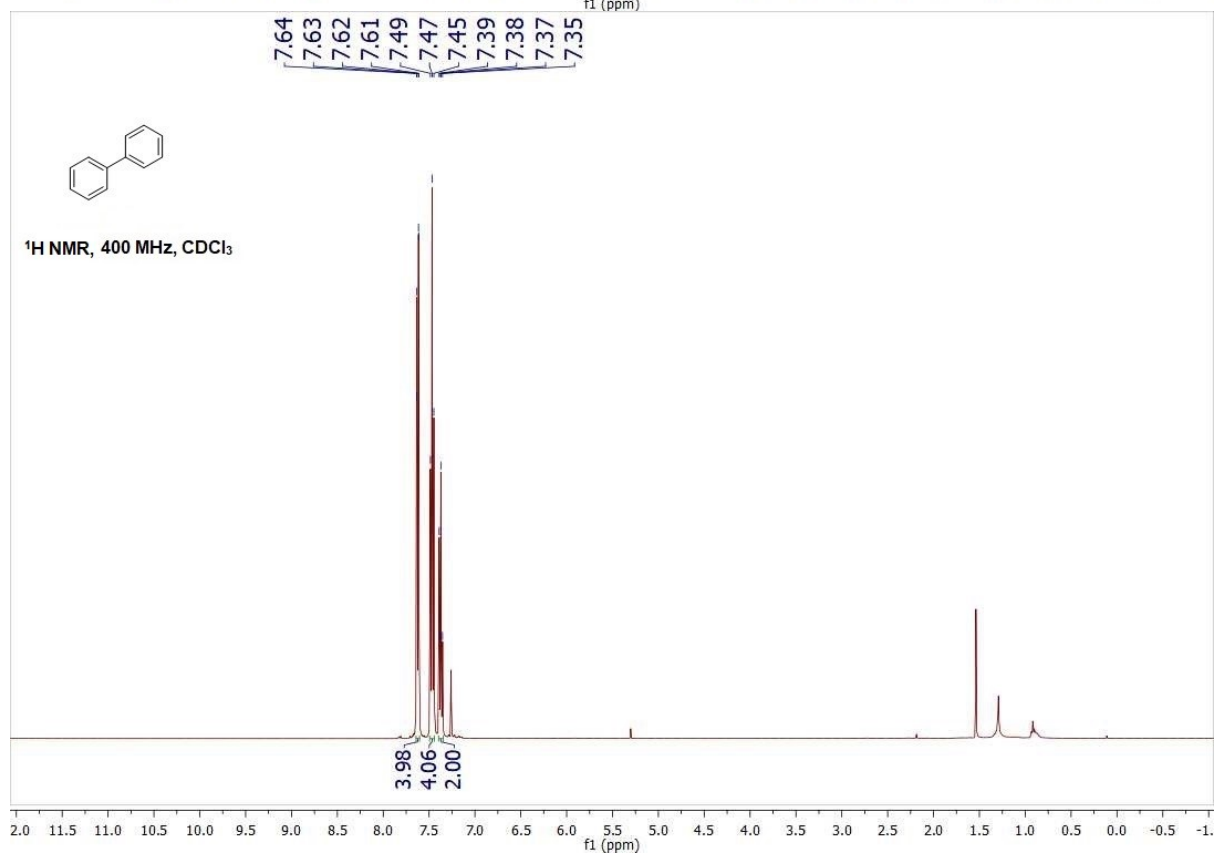

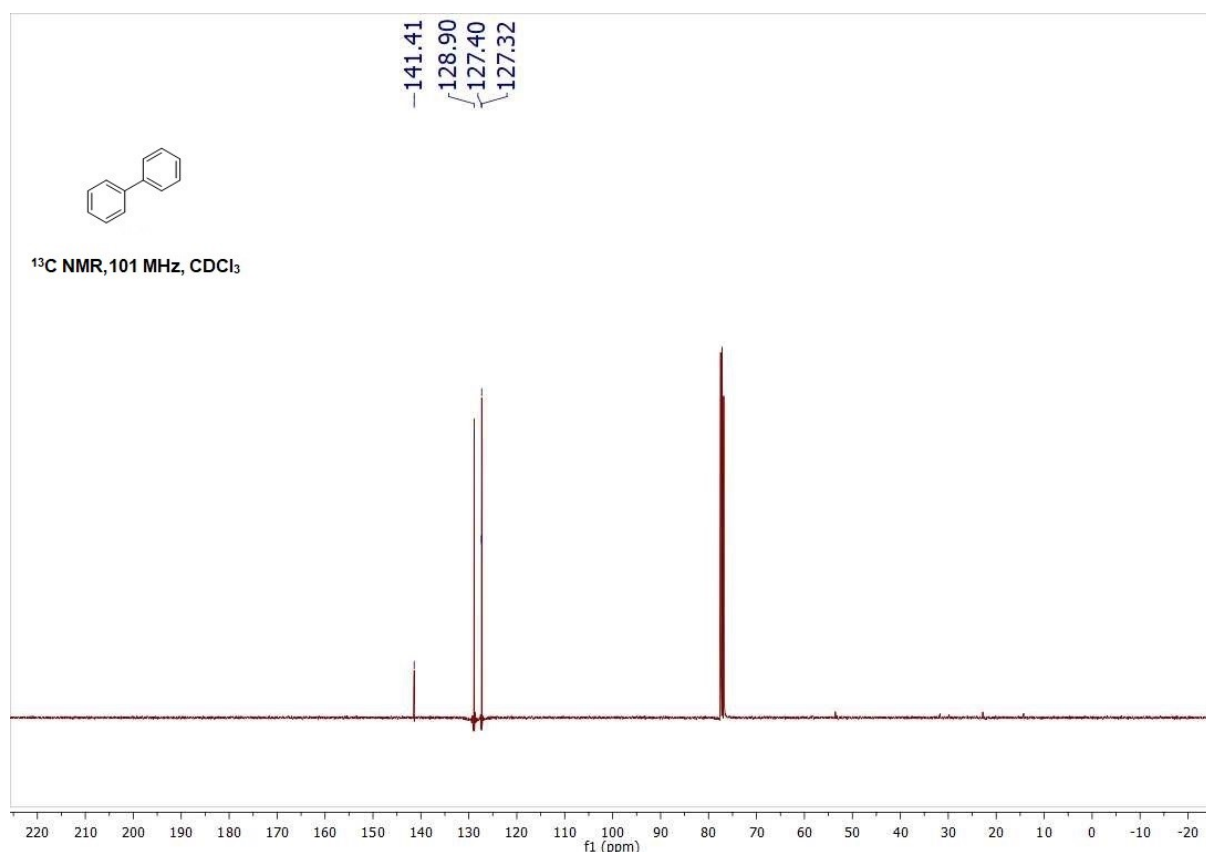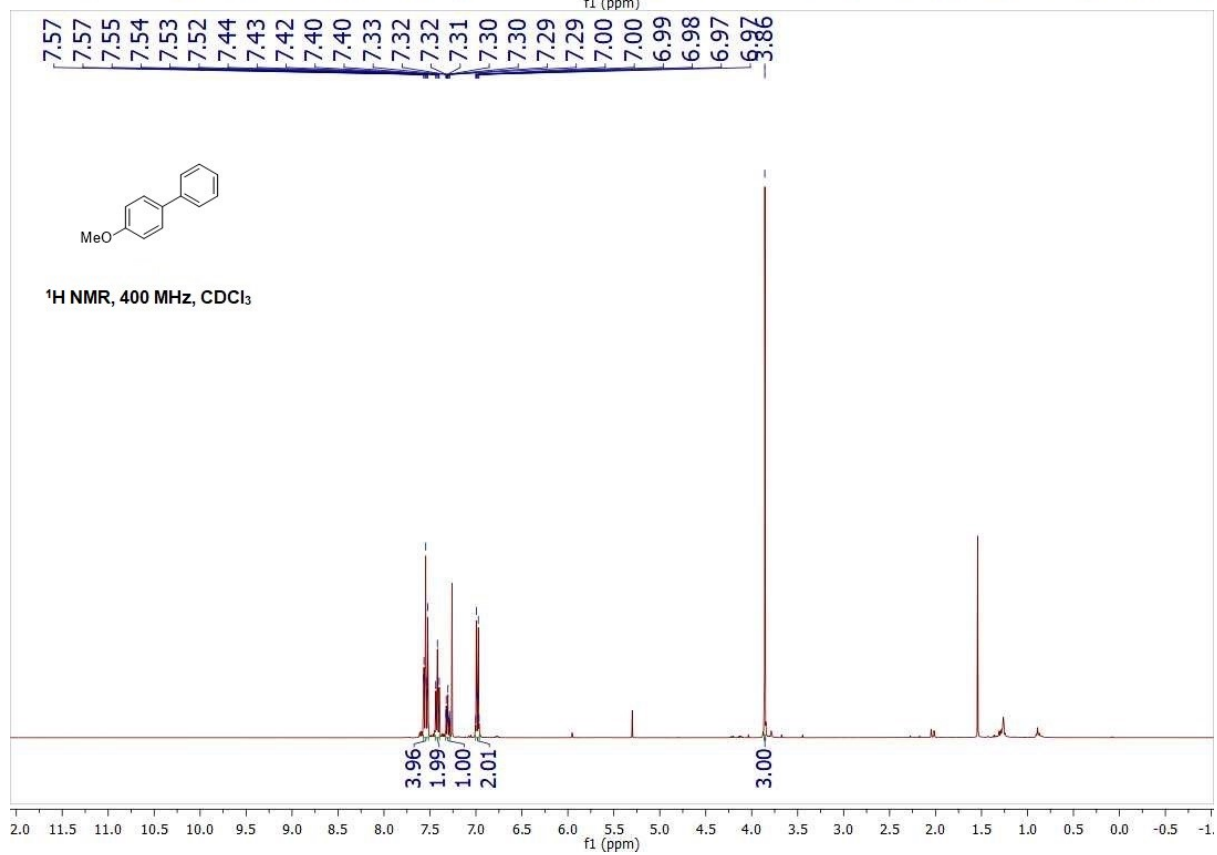

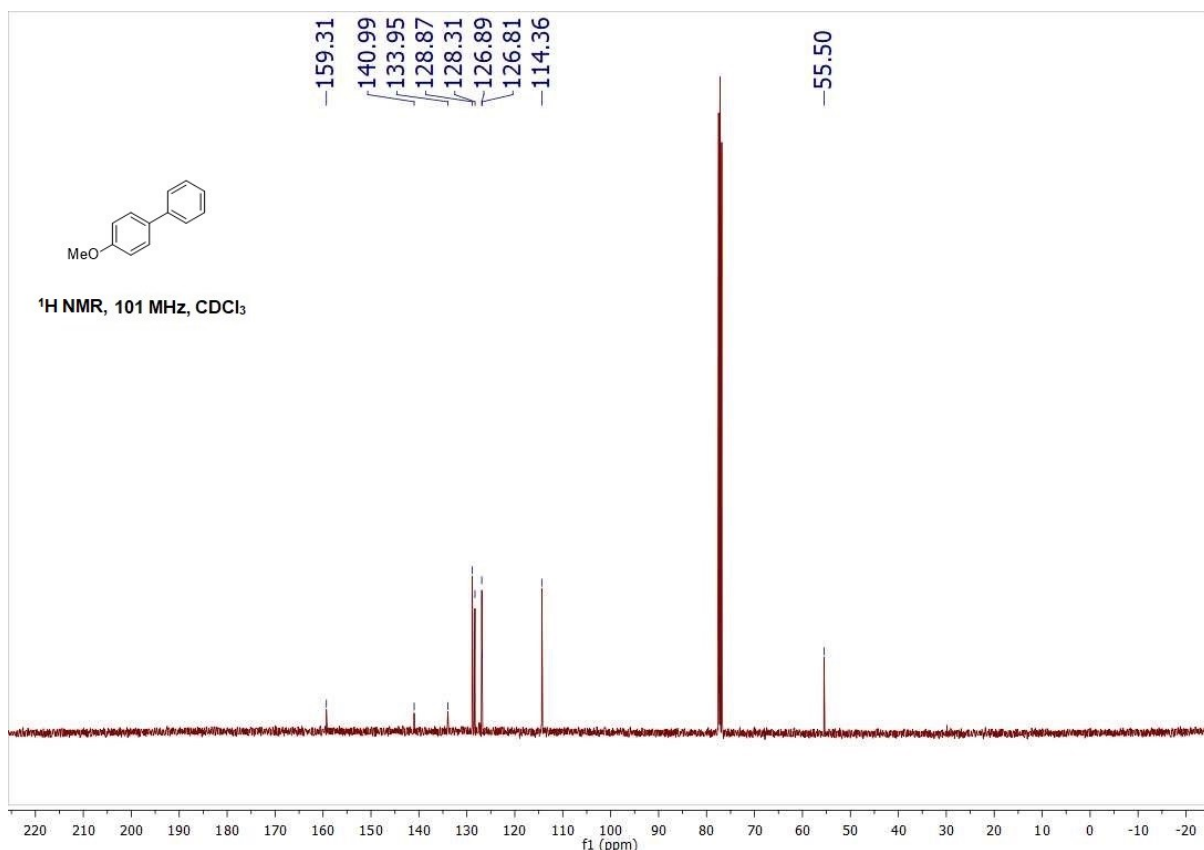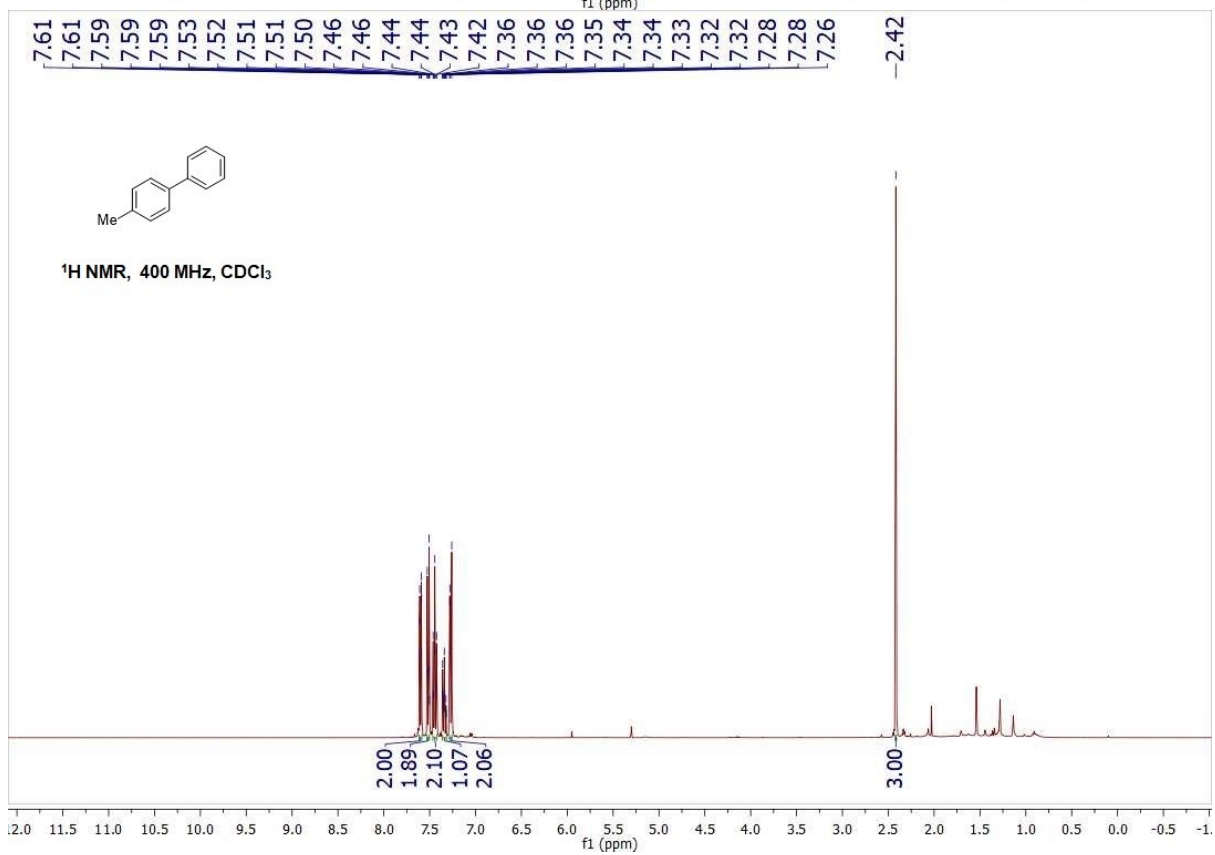

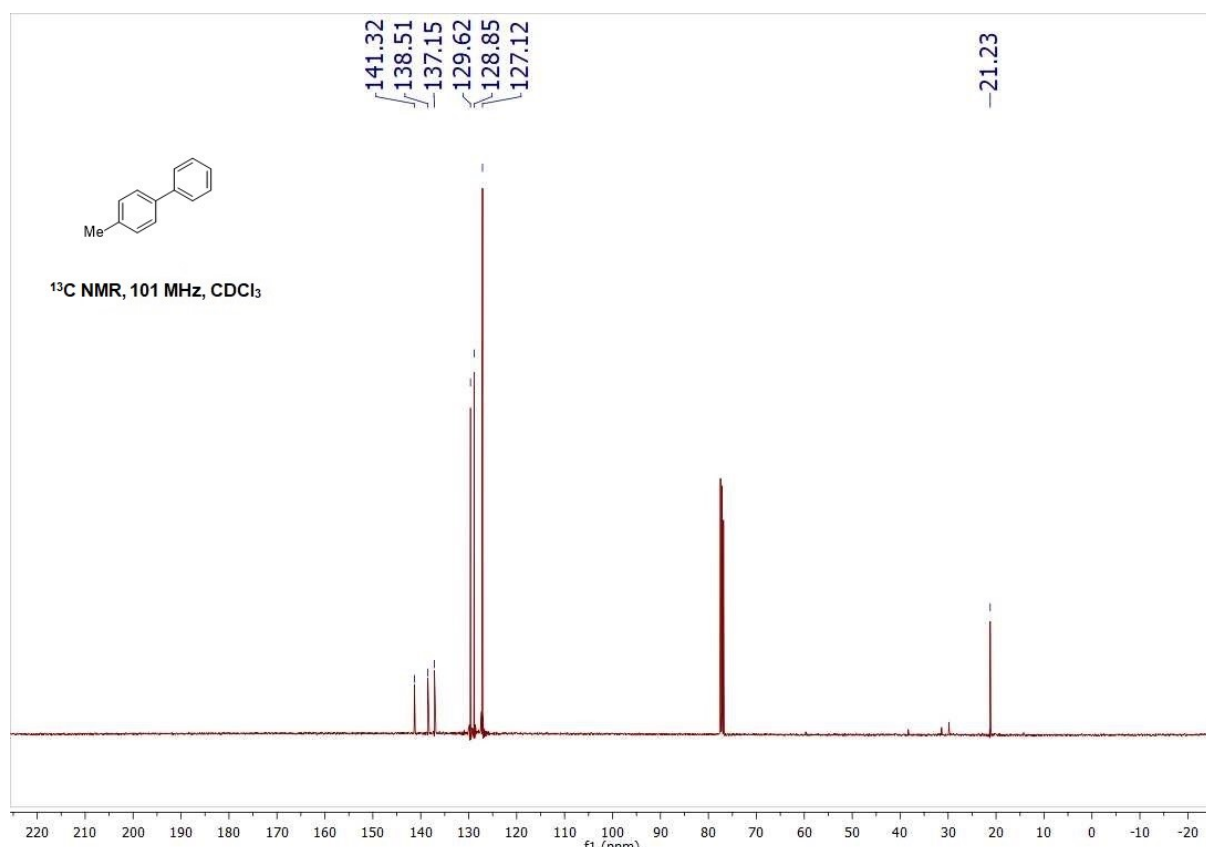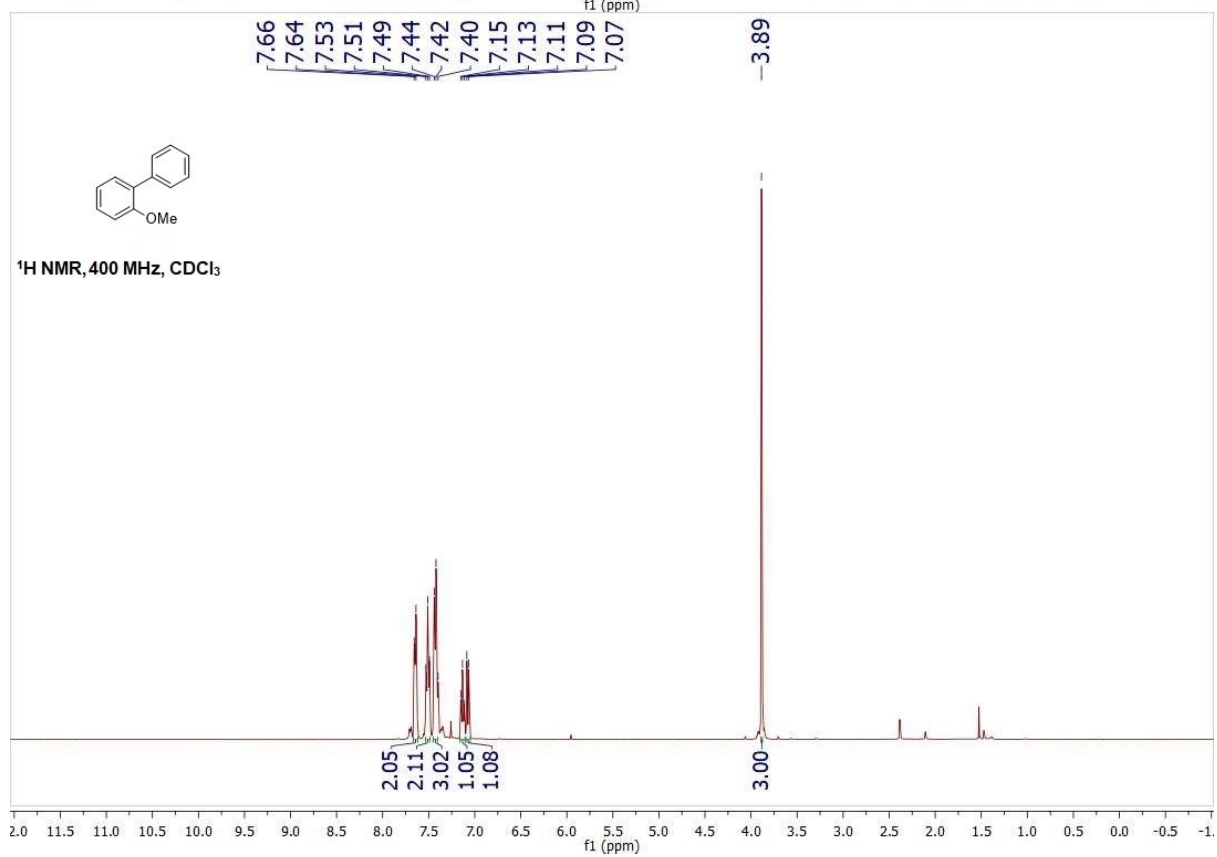



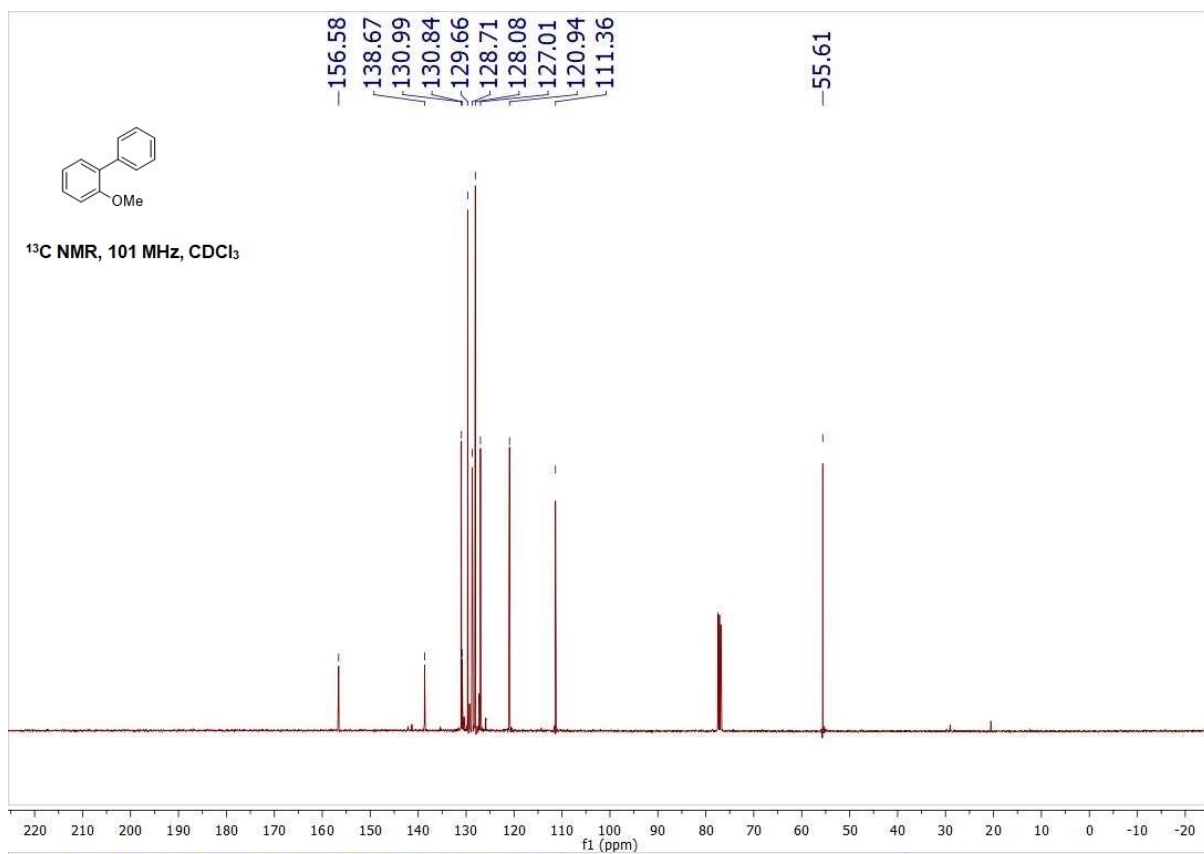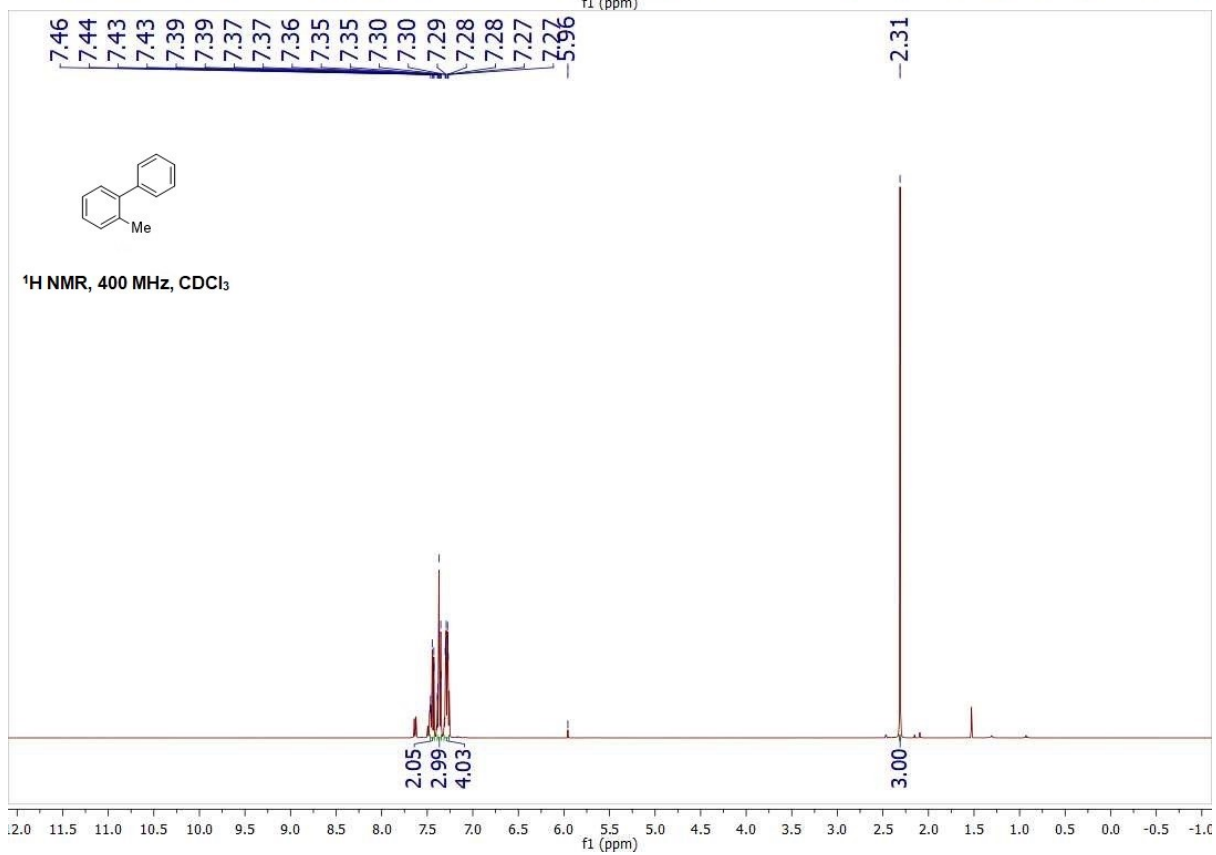

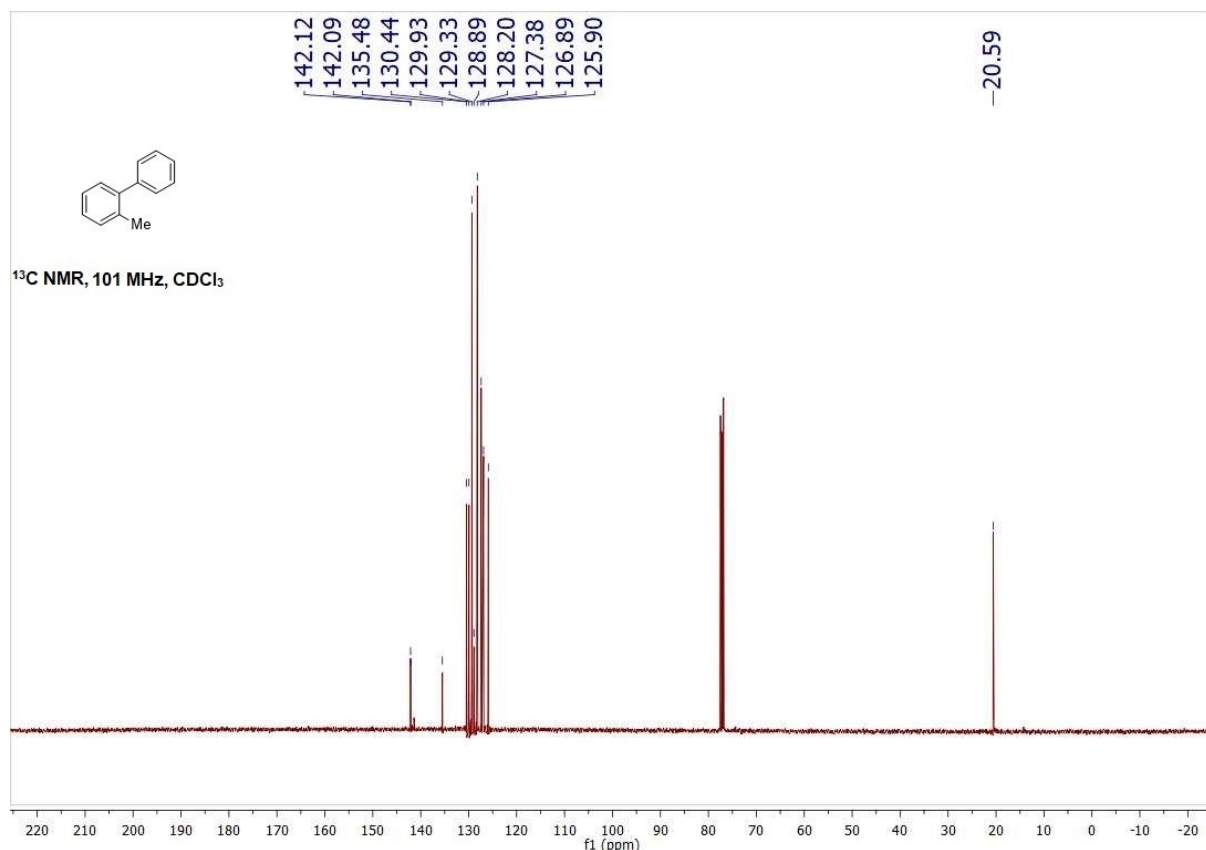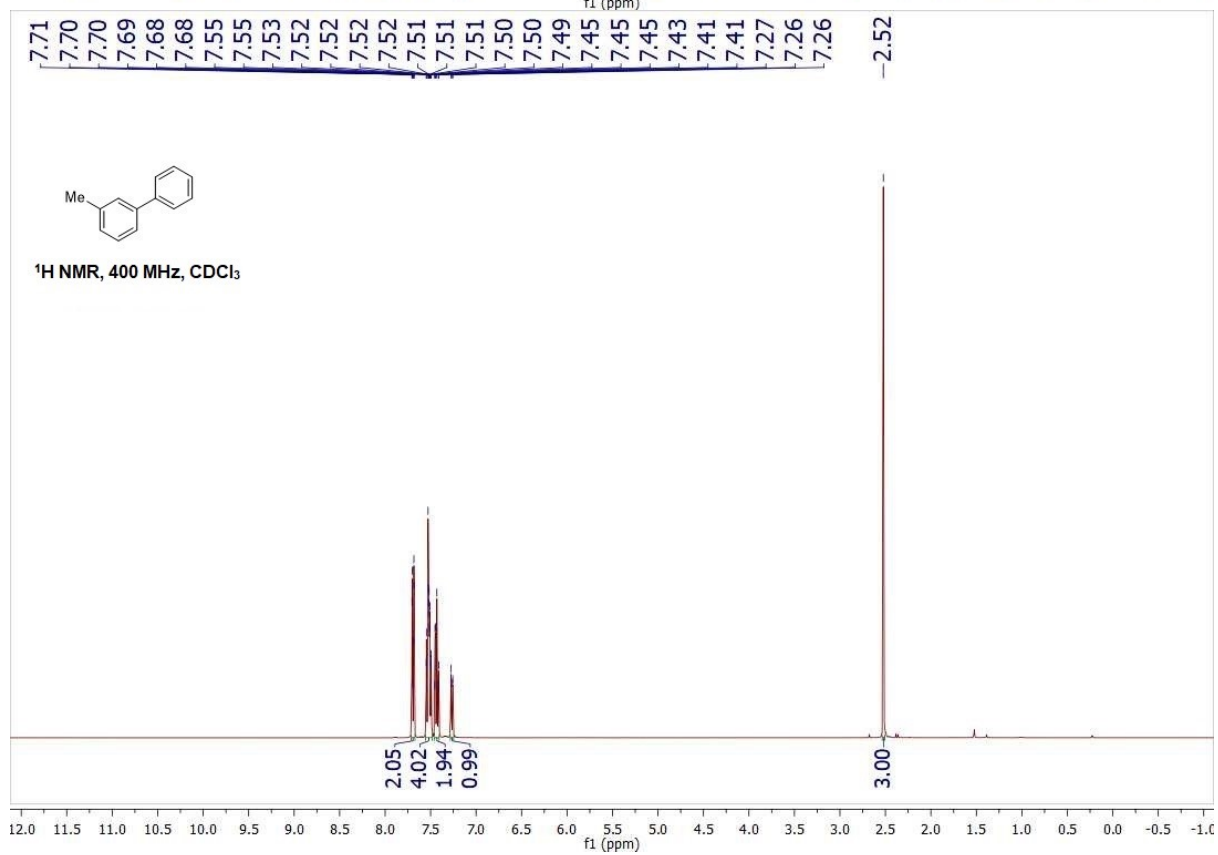

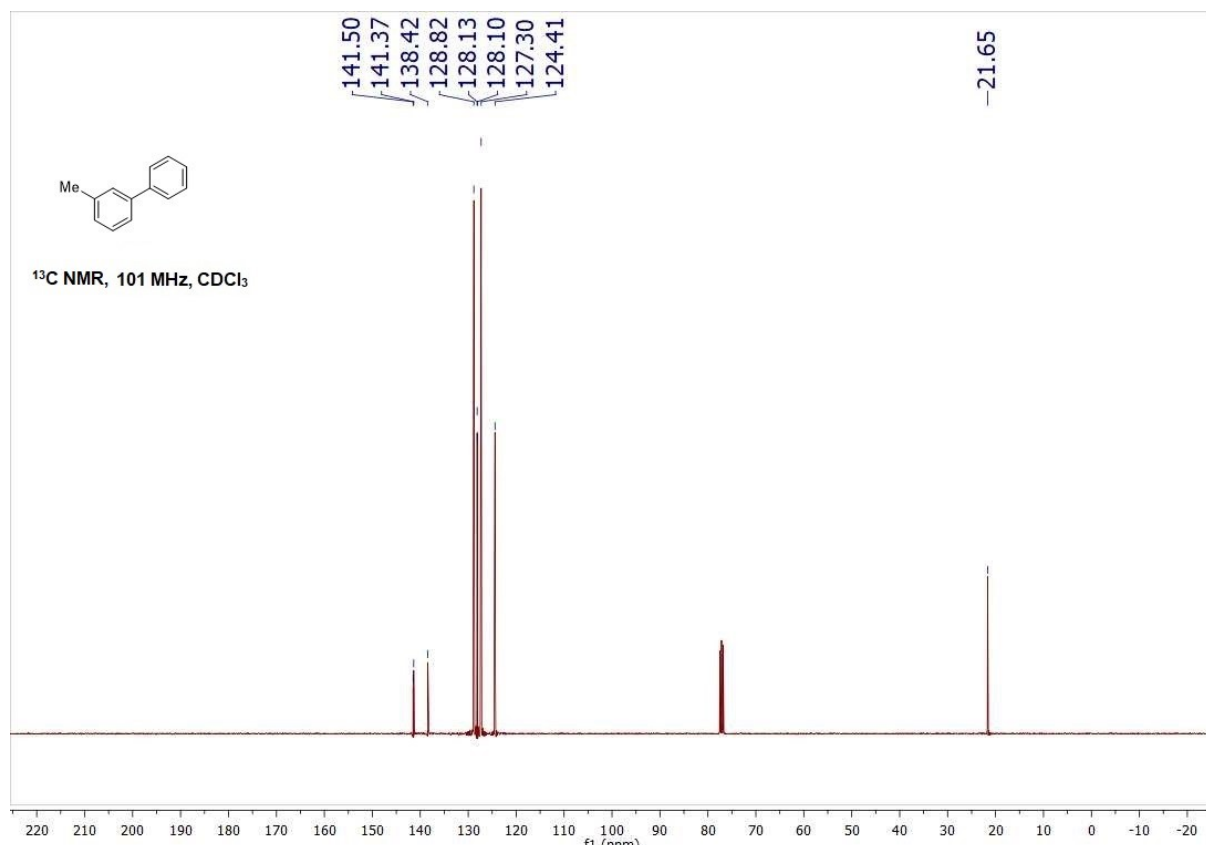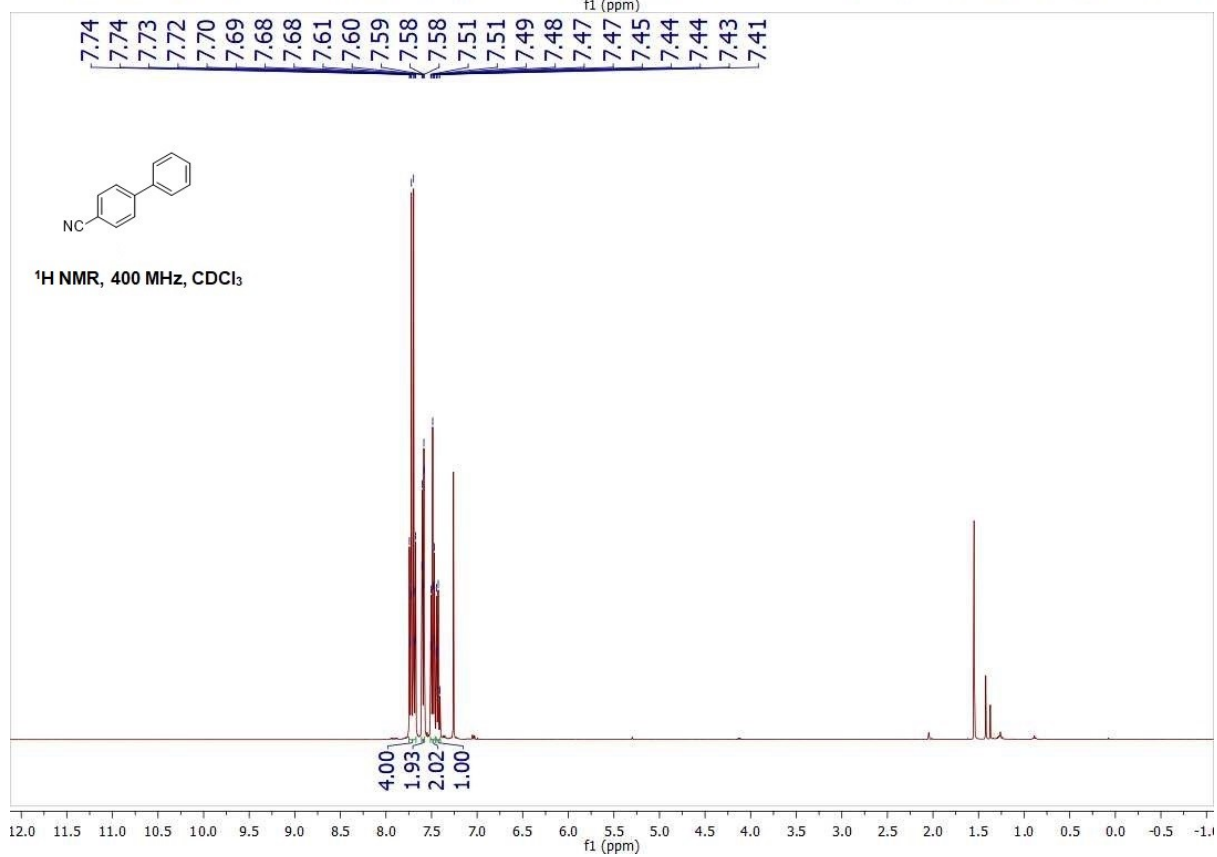

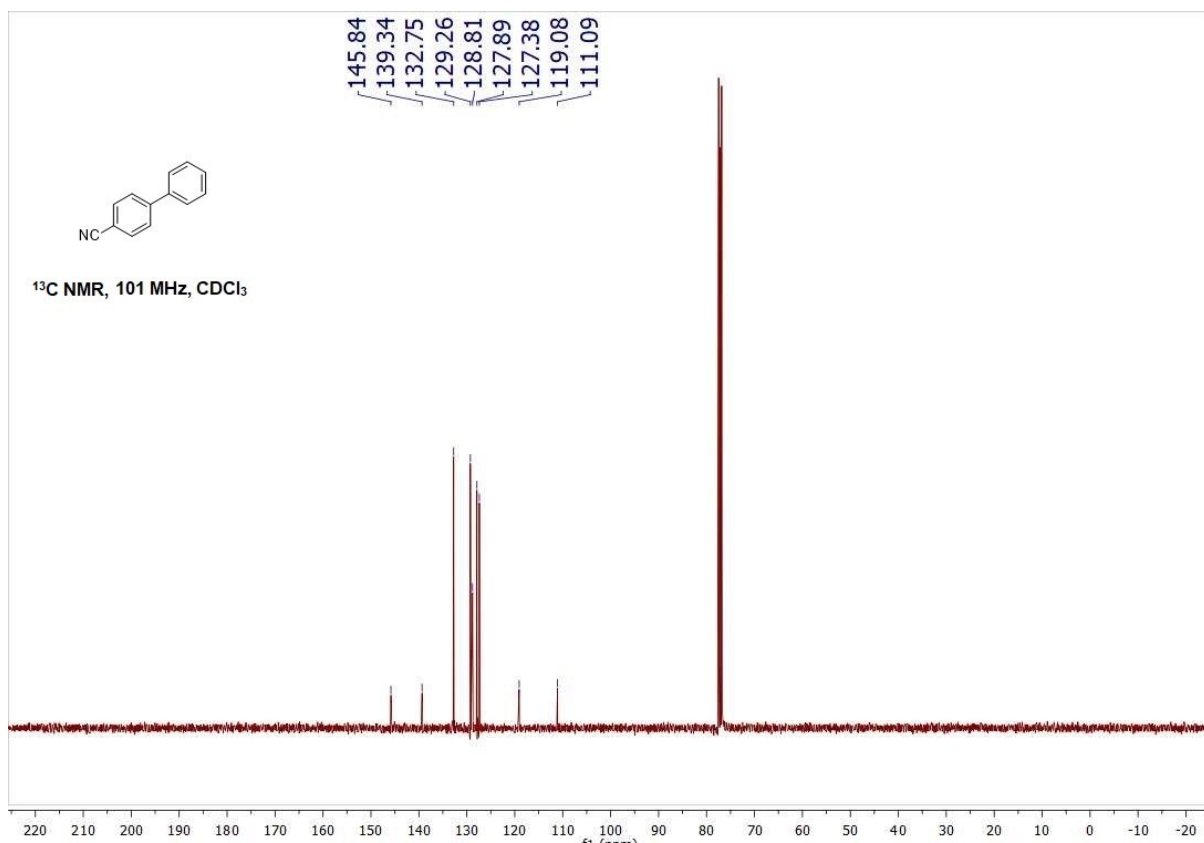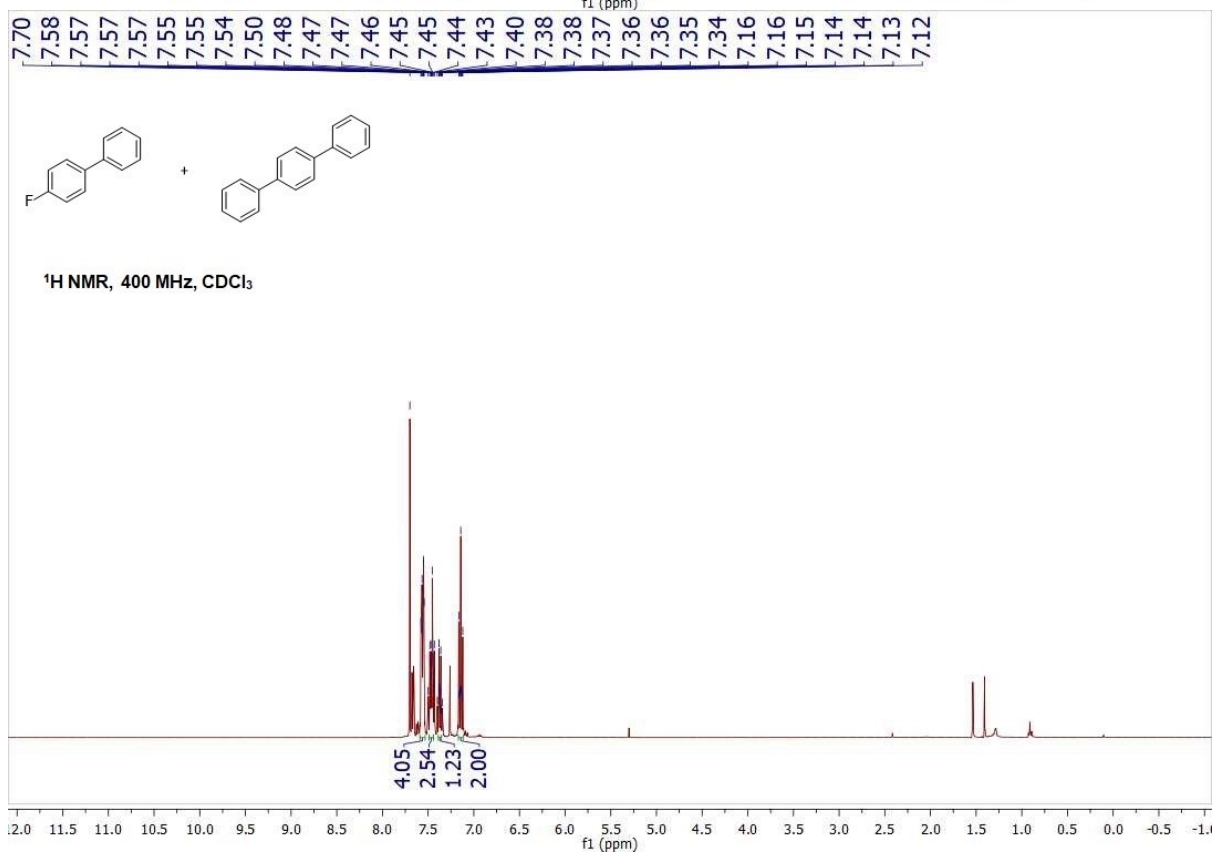

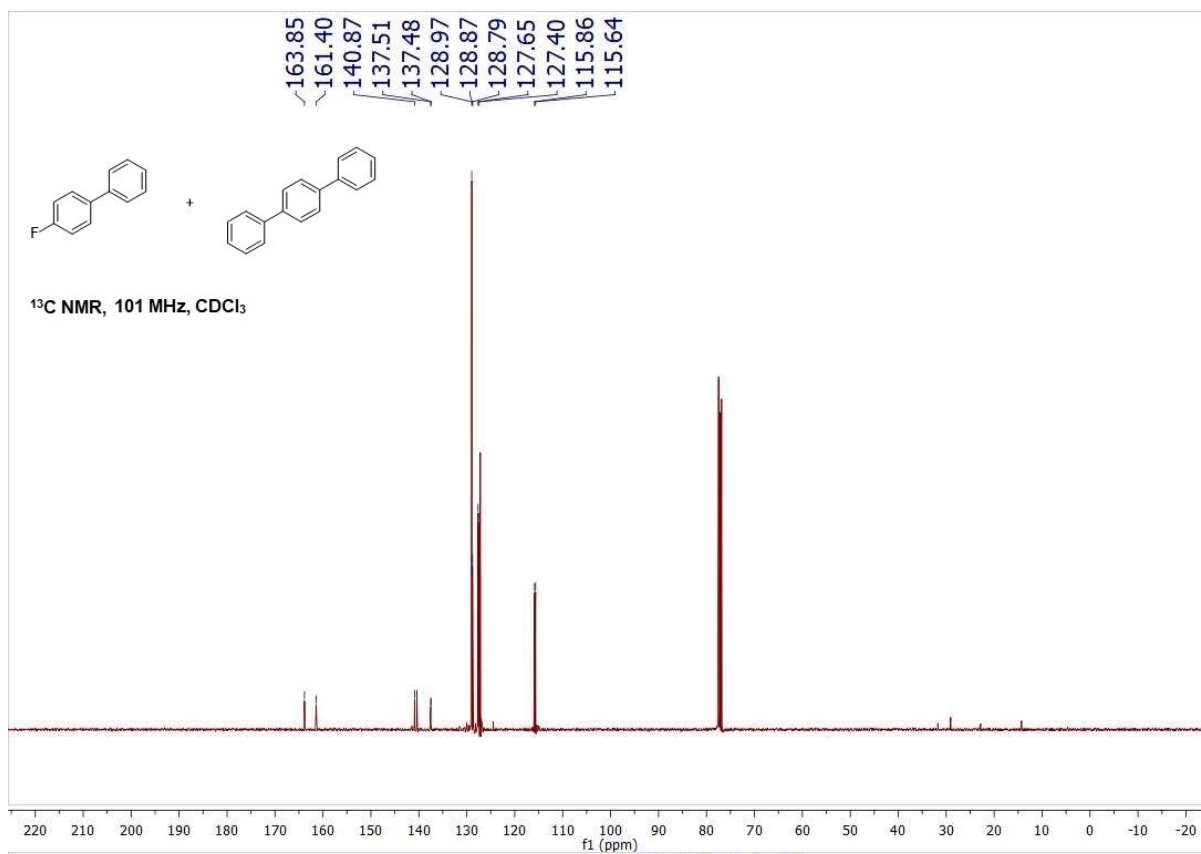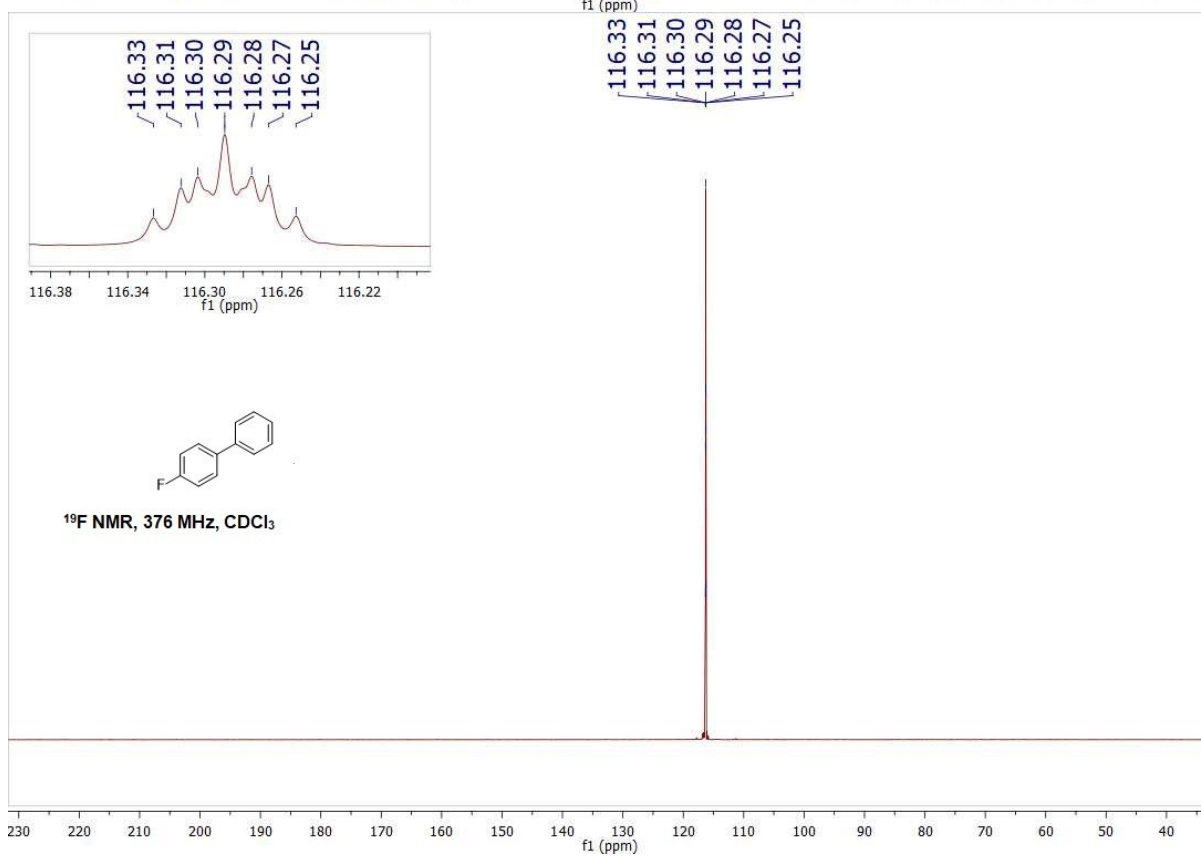

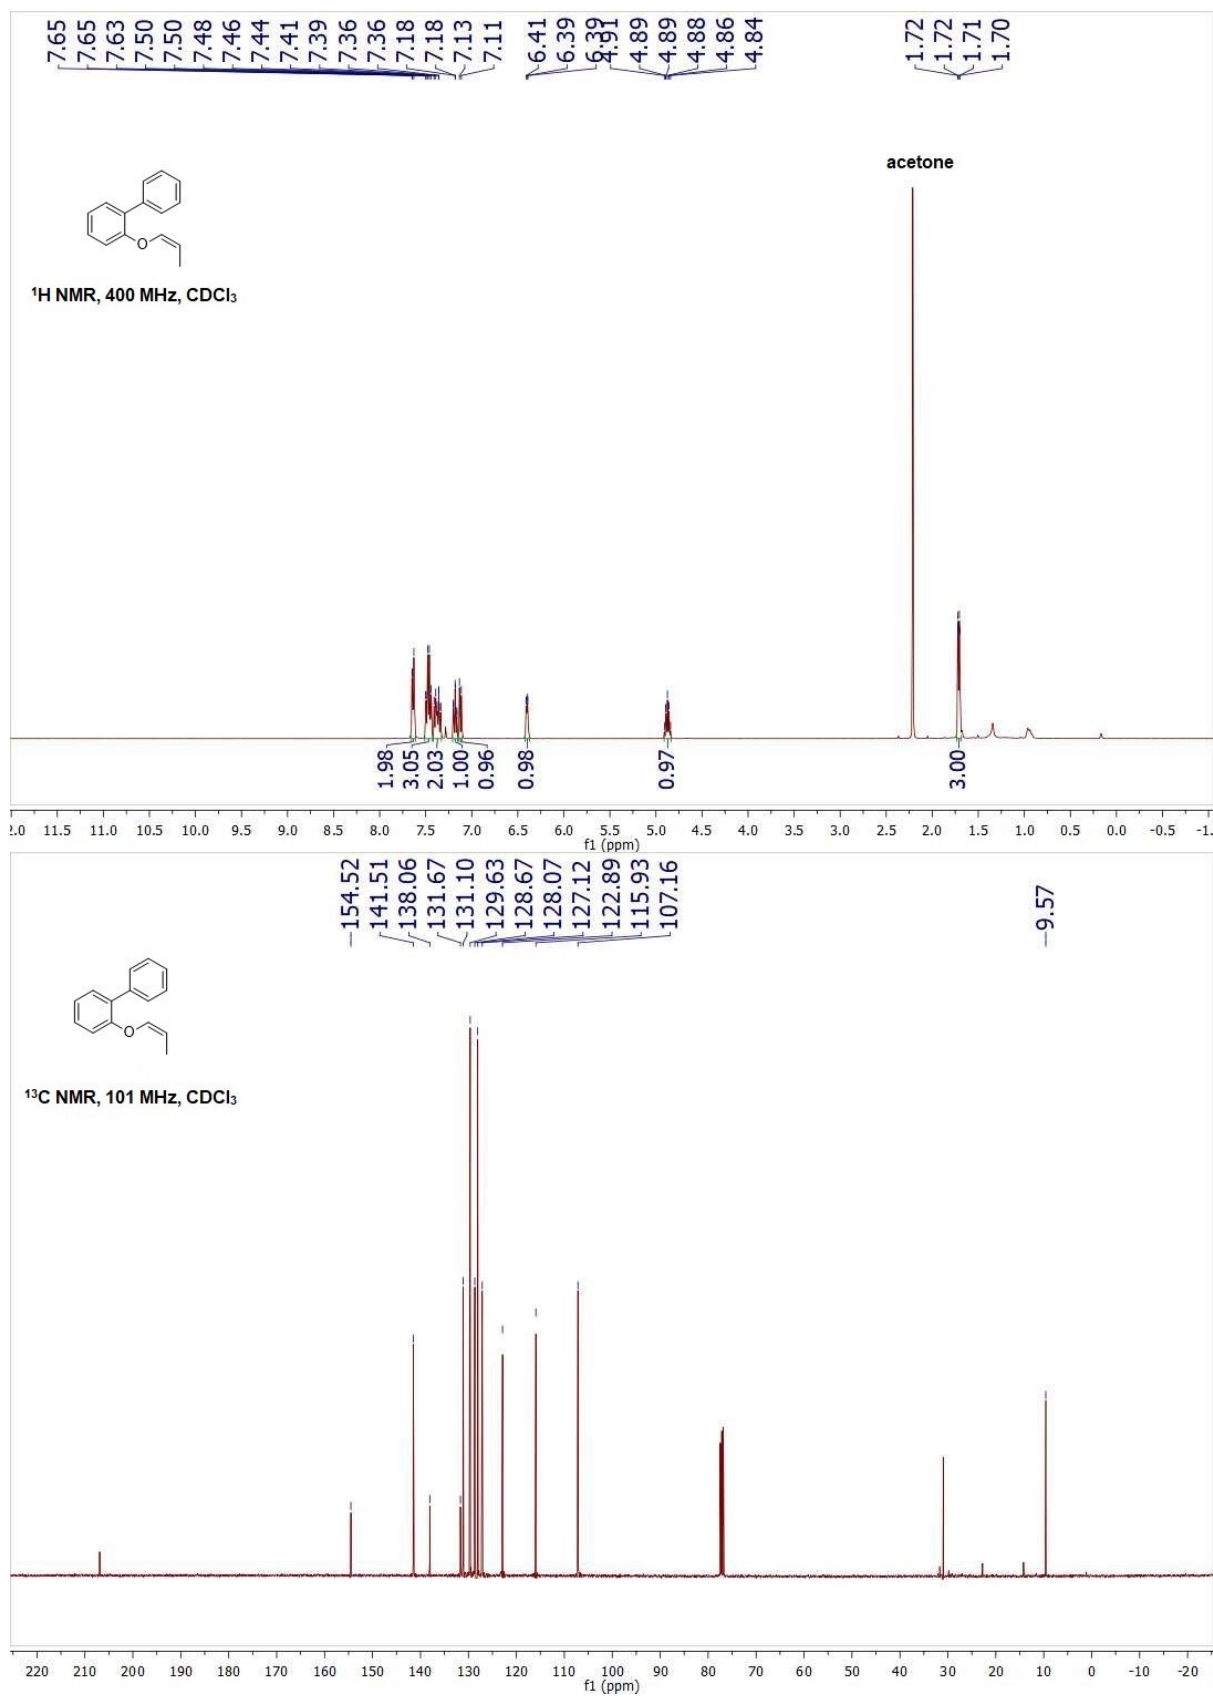

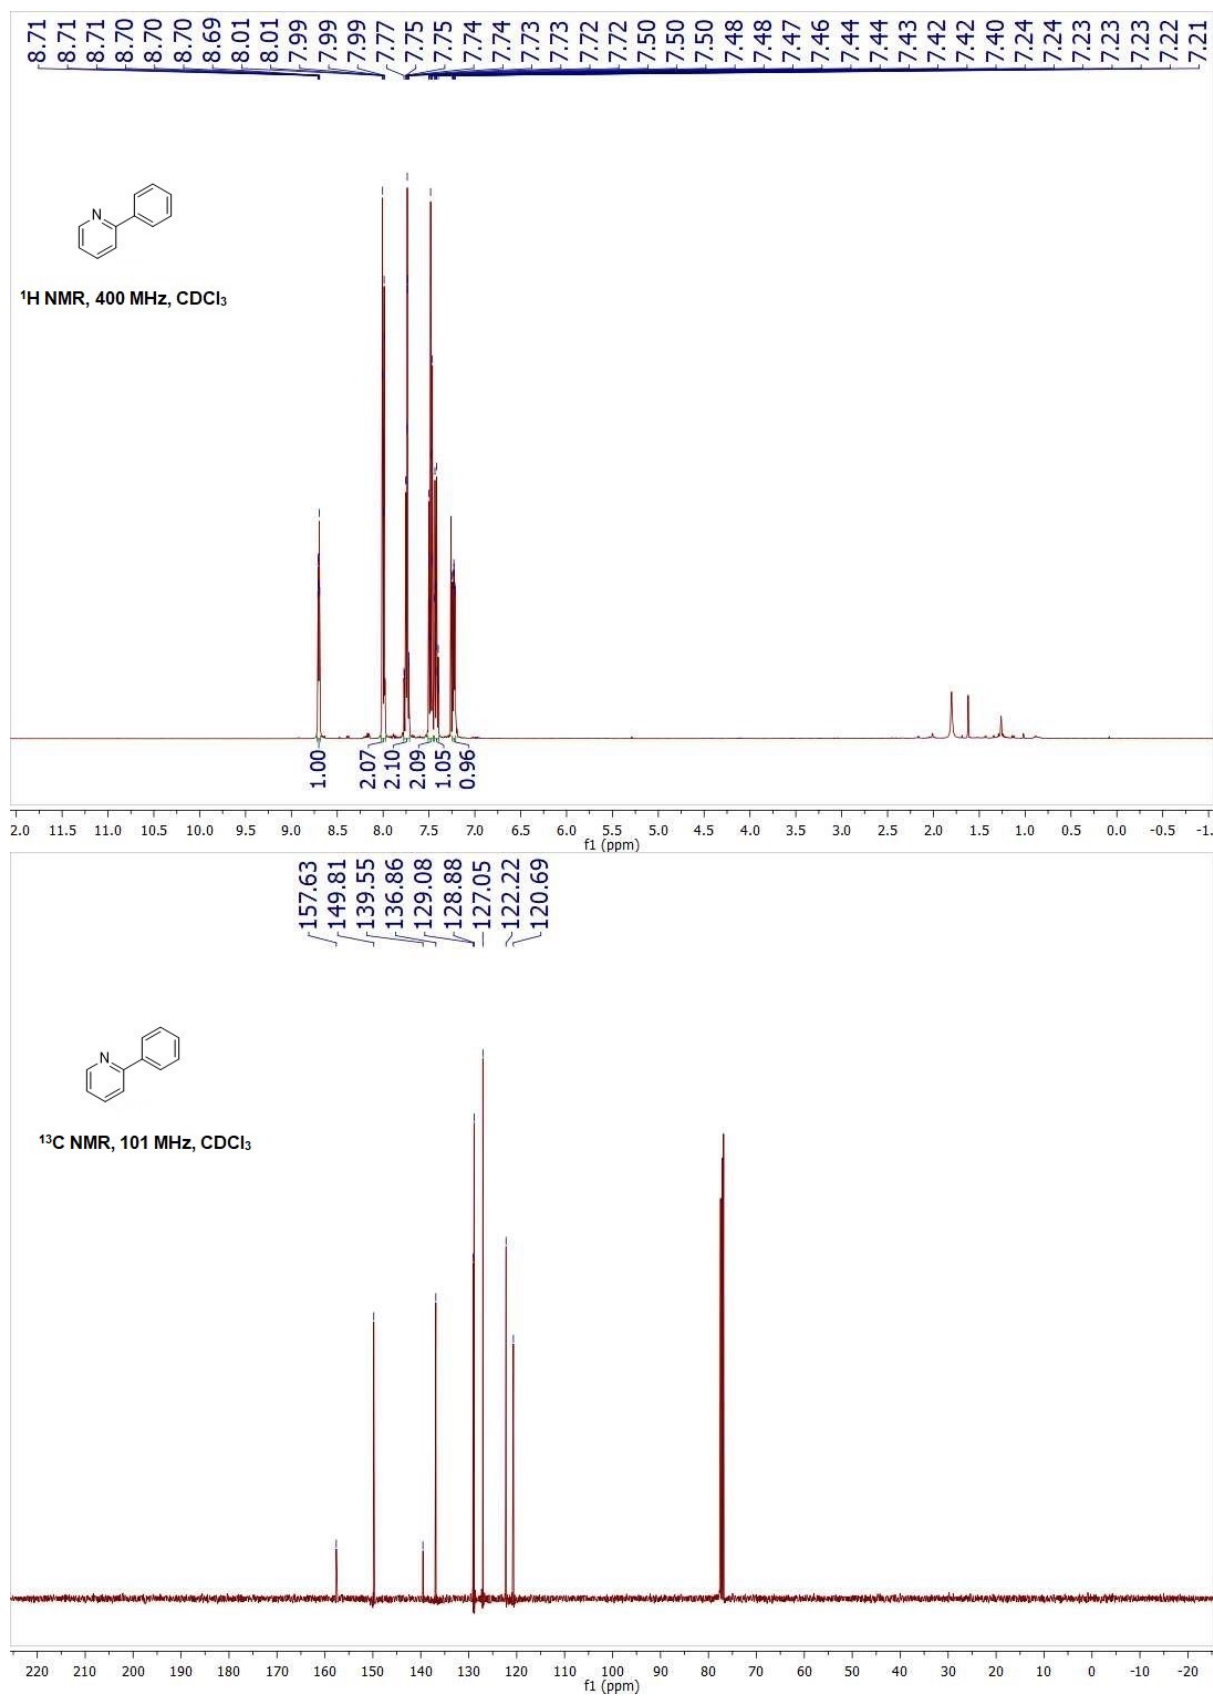

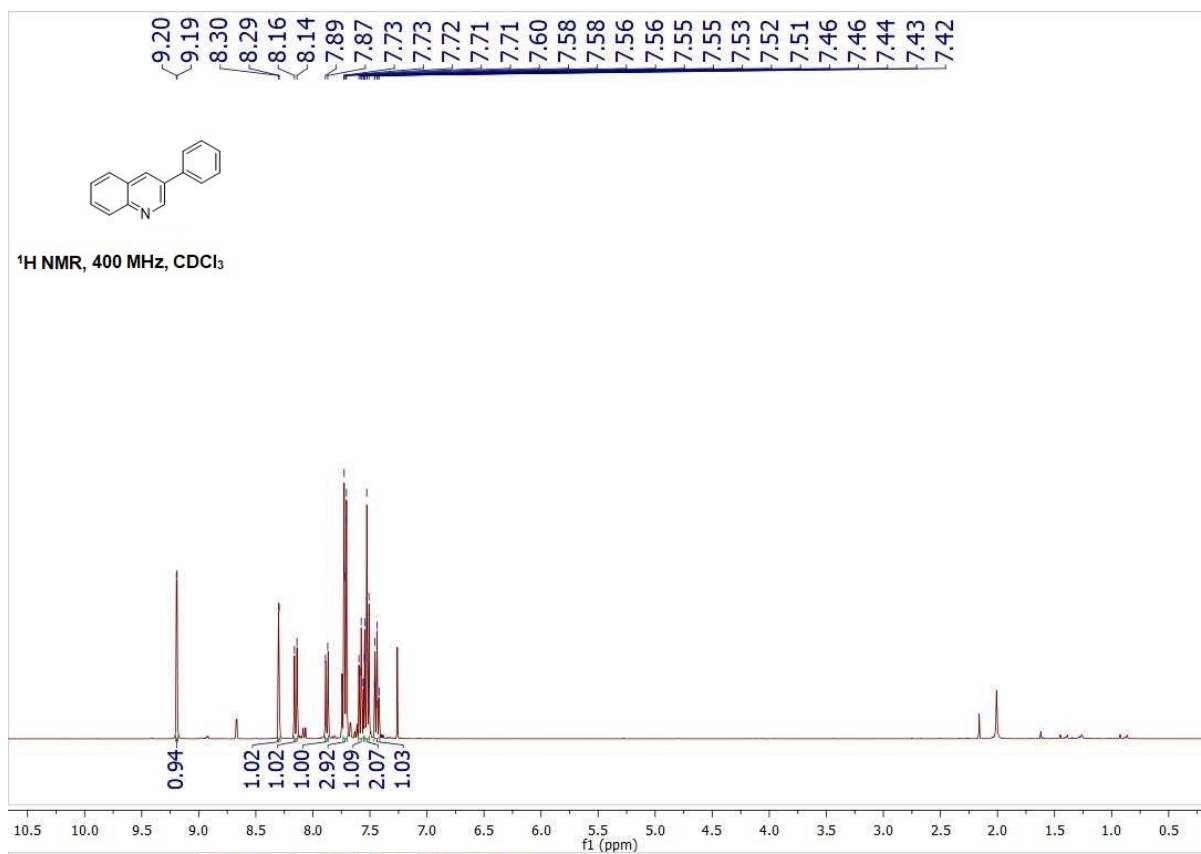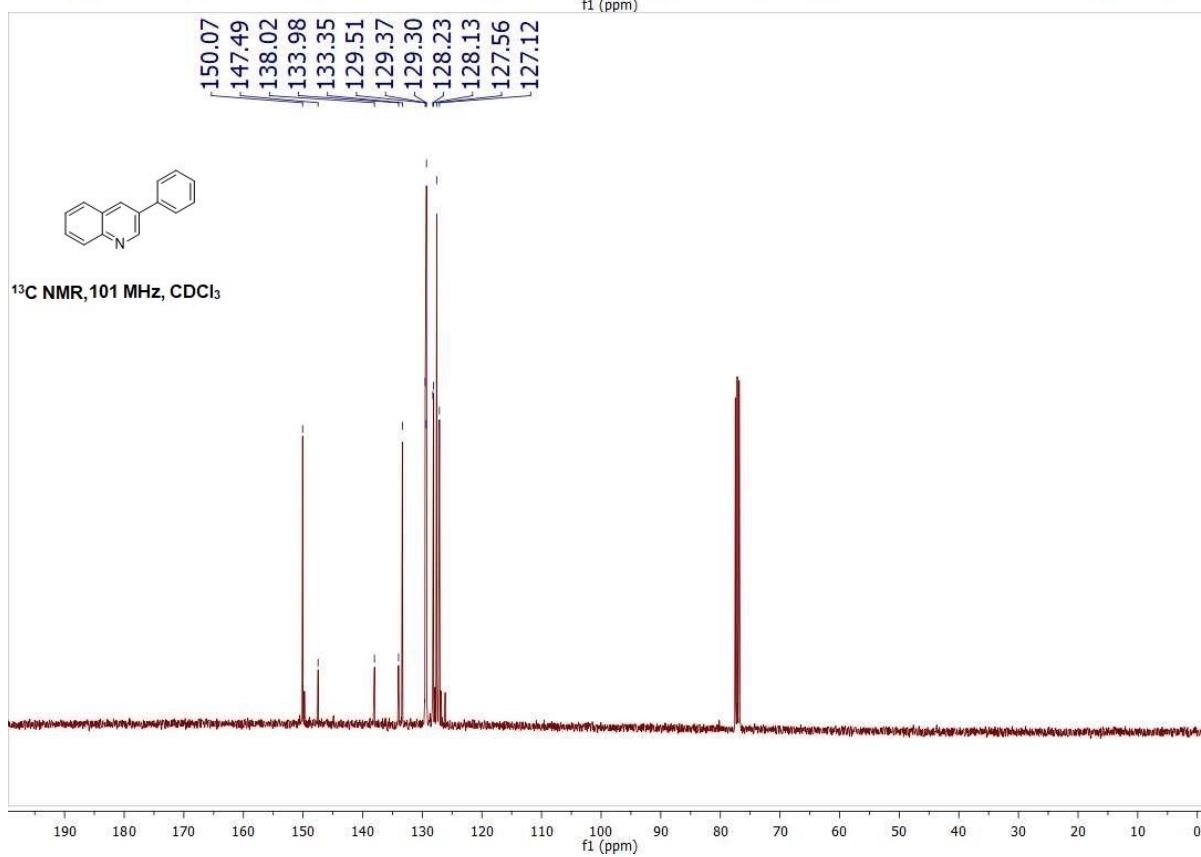



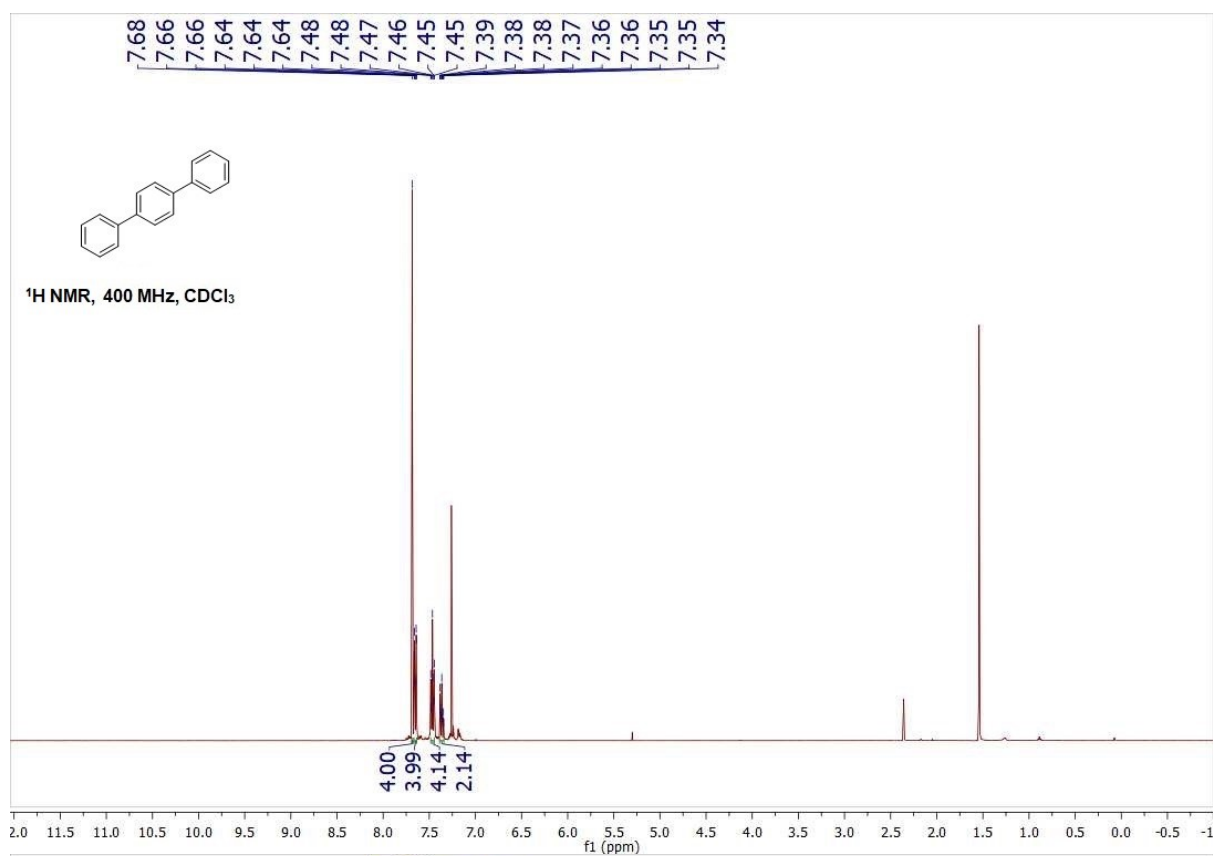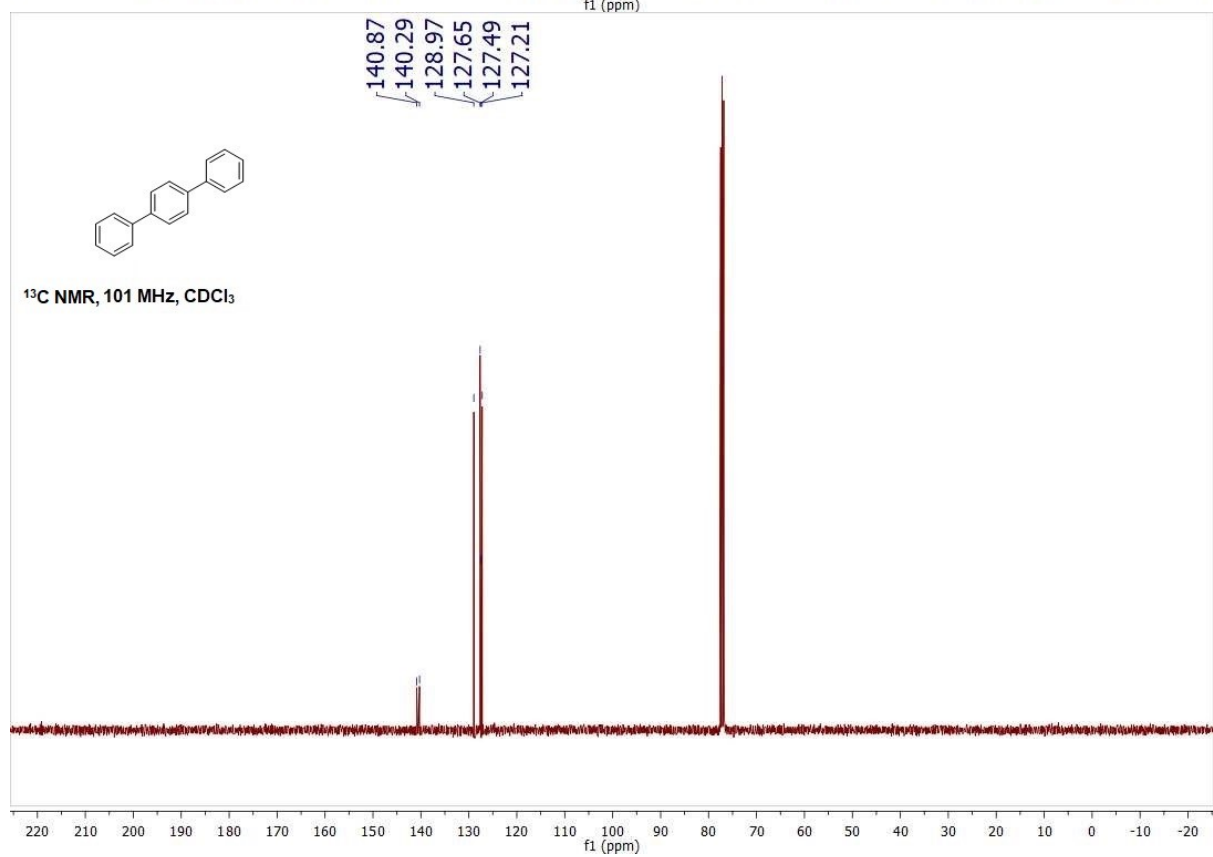

## IR spectra

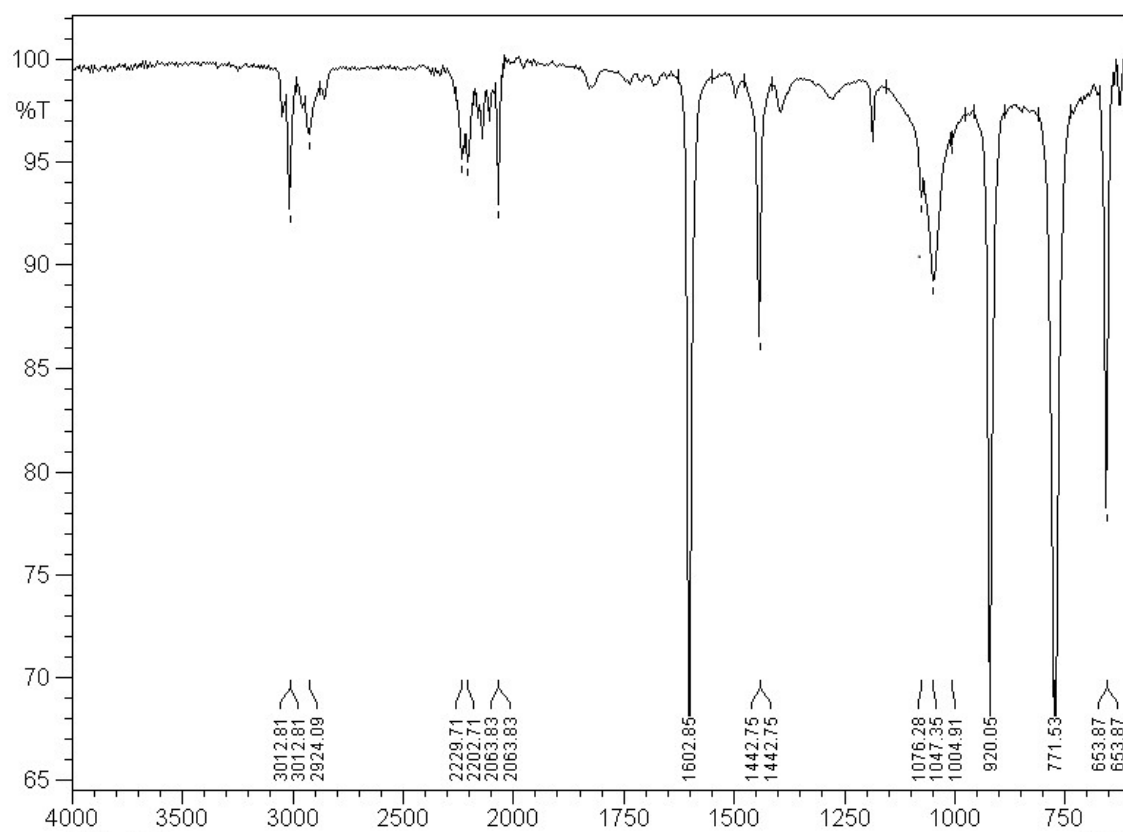FTIR spectrum of *d*<sub>9</sub>-mesitylene **S1**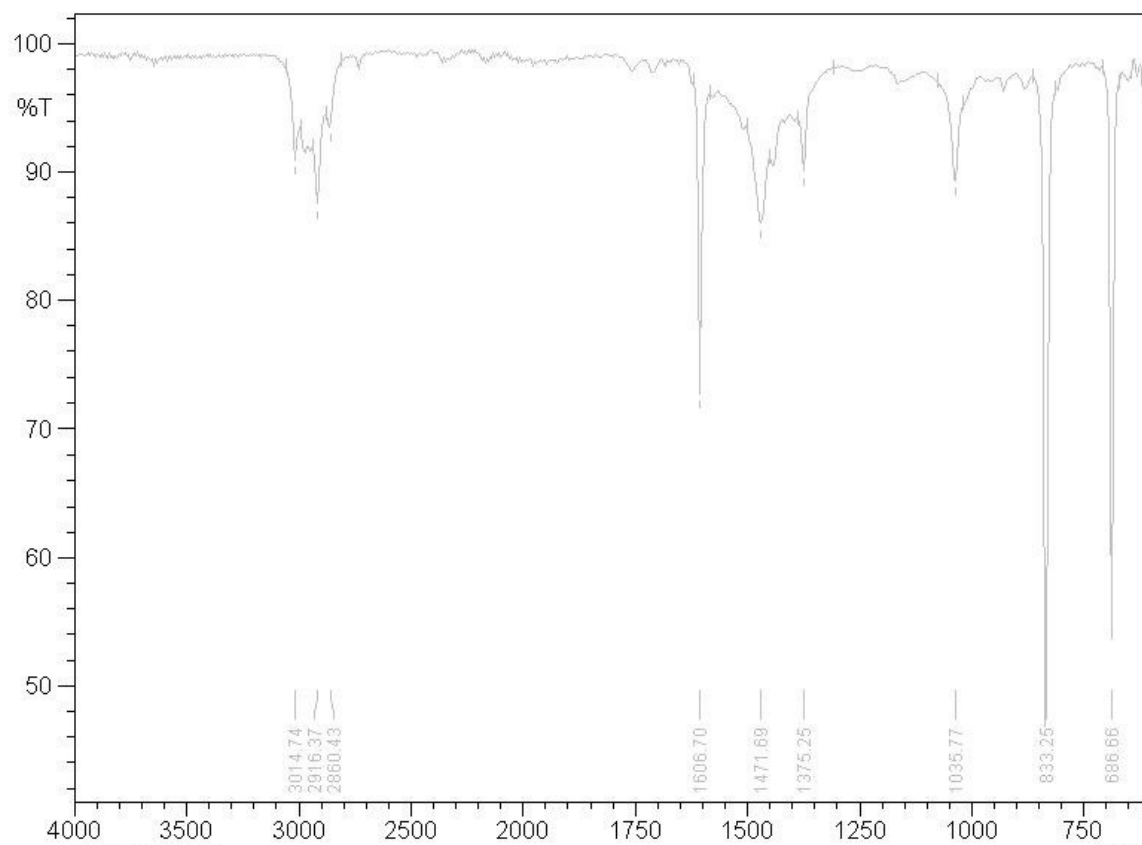

FTIR spectrum of commercial non-deuterated mesitylene

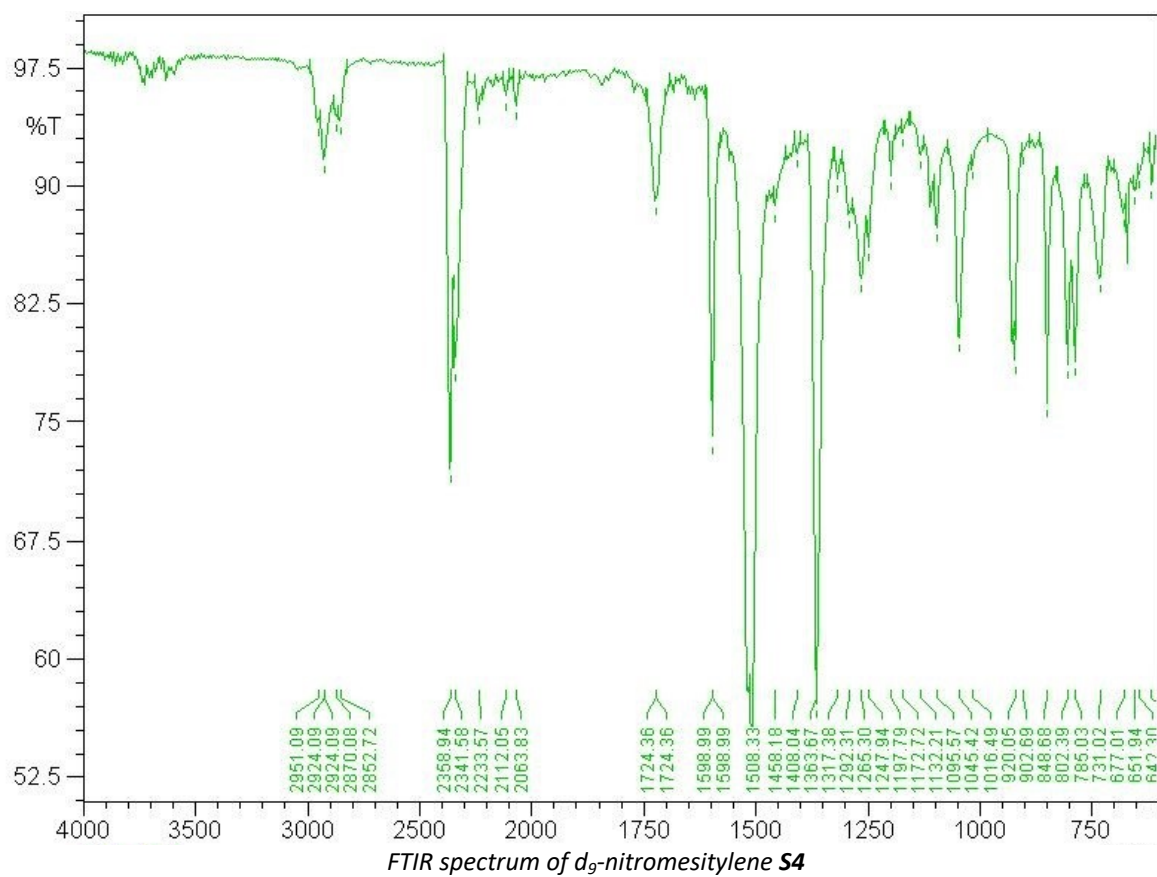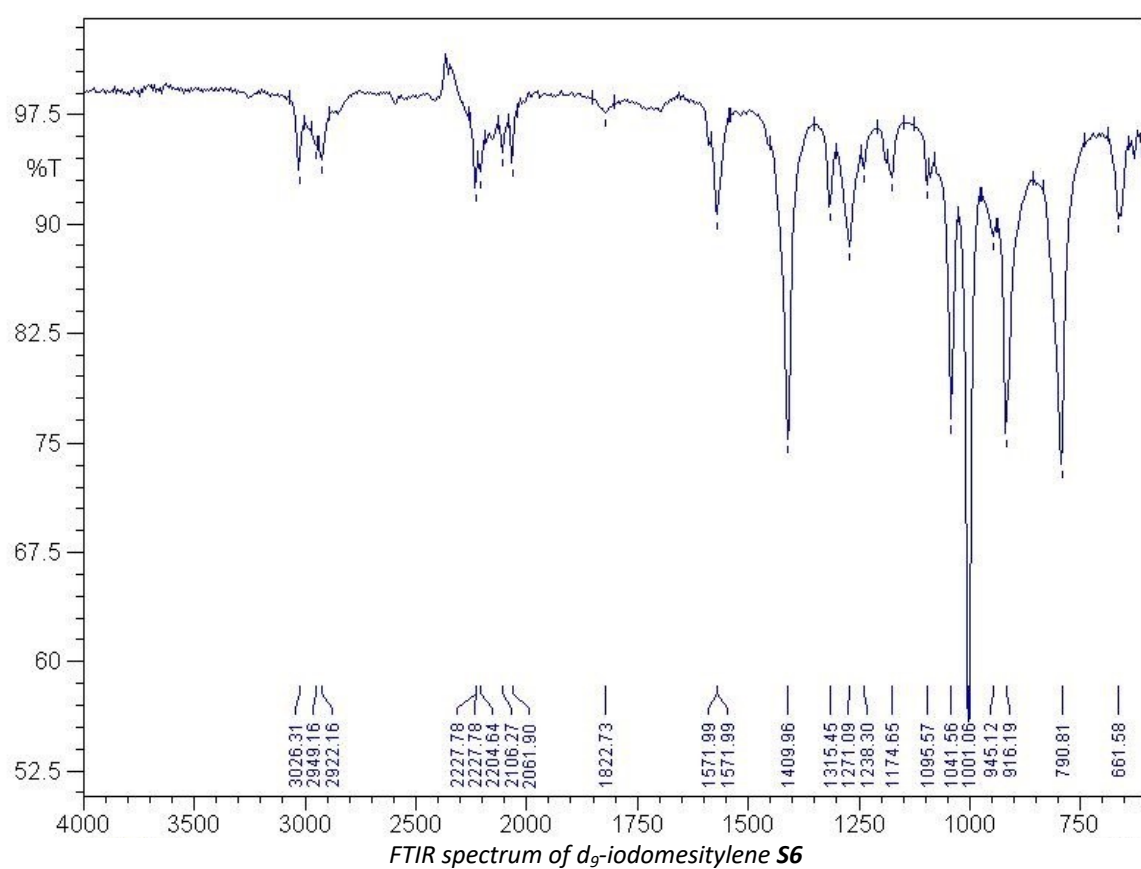

## GC-FID traces

Approximate retention times: **6** RT = 11.2 min, **7** RT = 12.4 min, **5** RT = 12.0 min, **8** RT = 7.1 min, *n*-dodecane RT = 10.6 min.

### GC-FID traces for reaction condition screen (Page S15, Table S1)

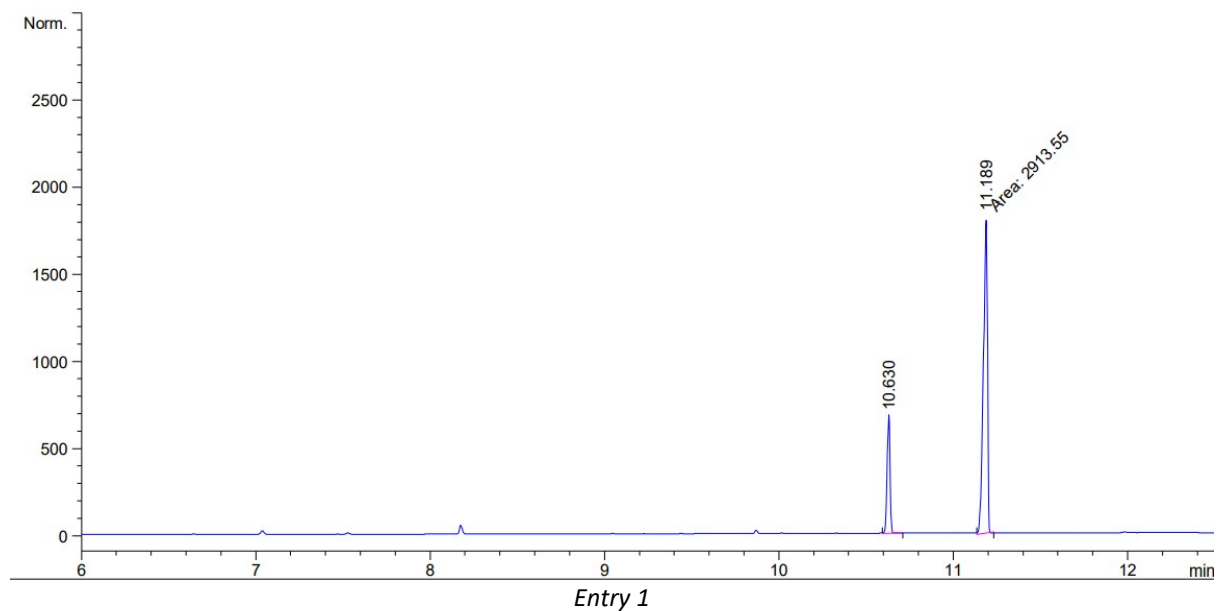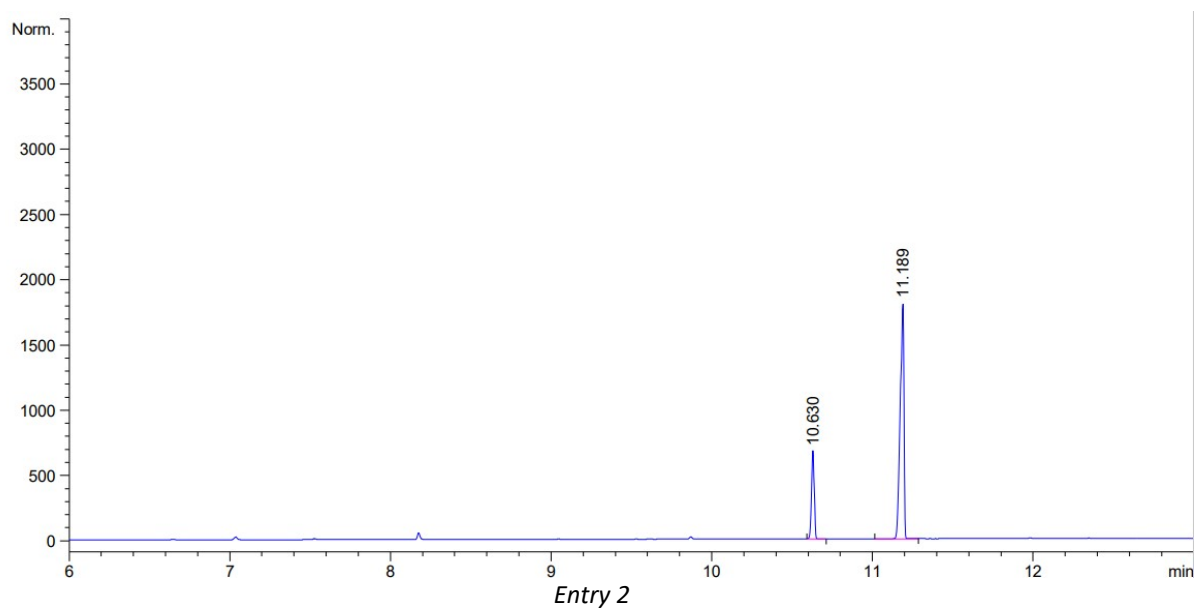

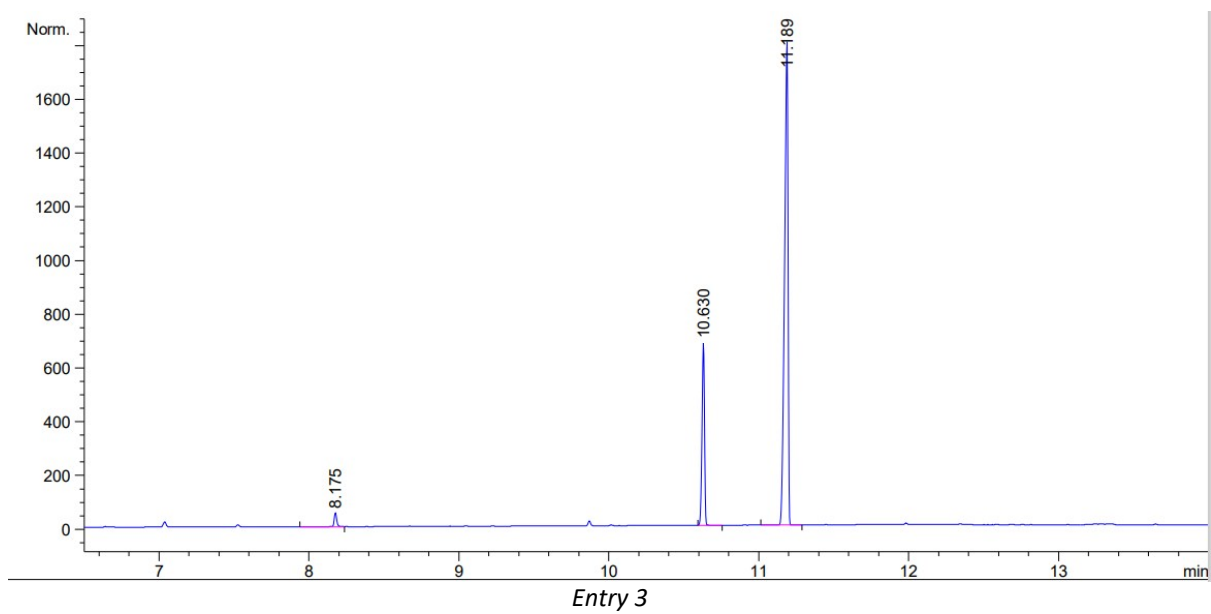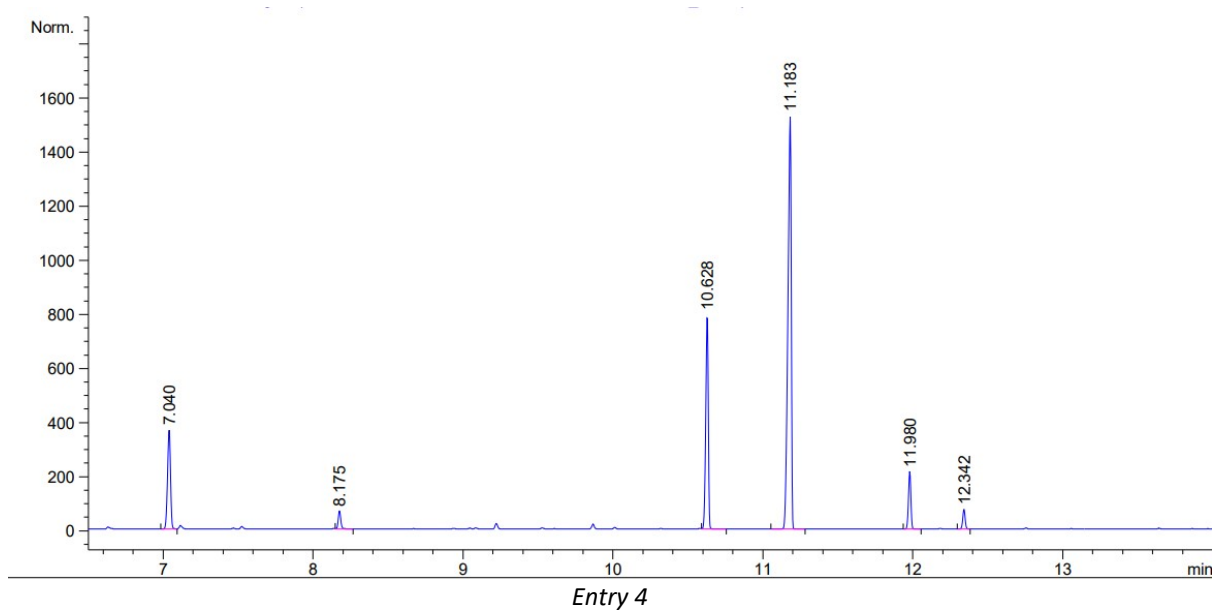

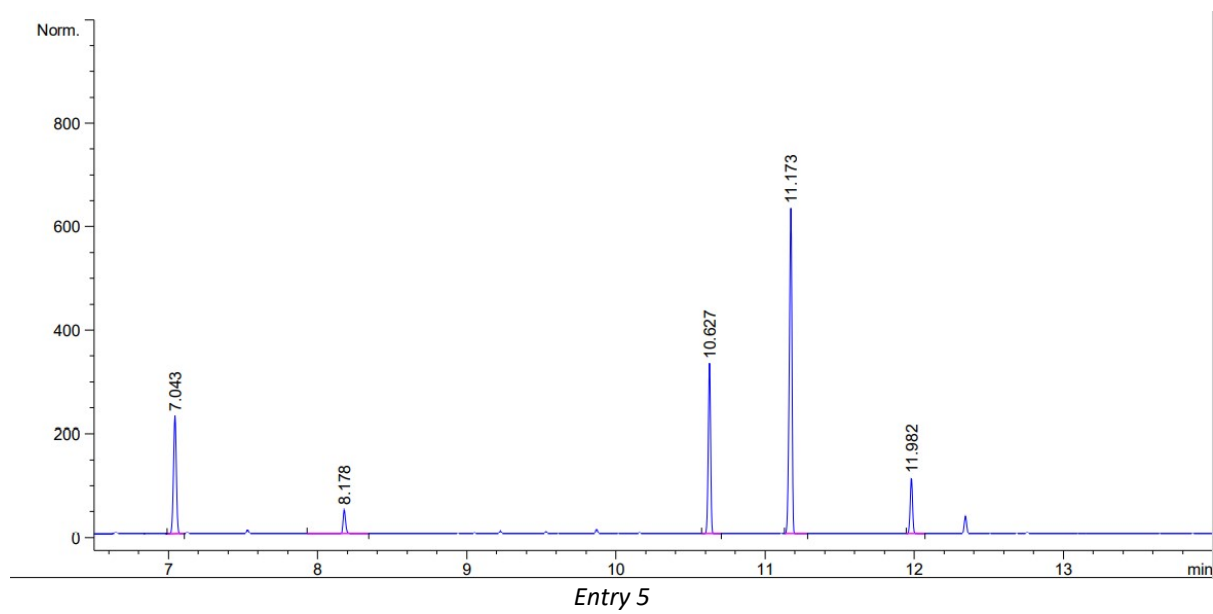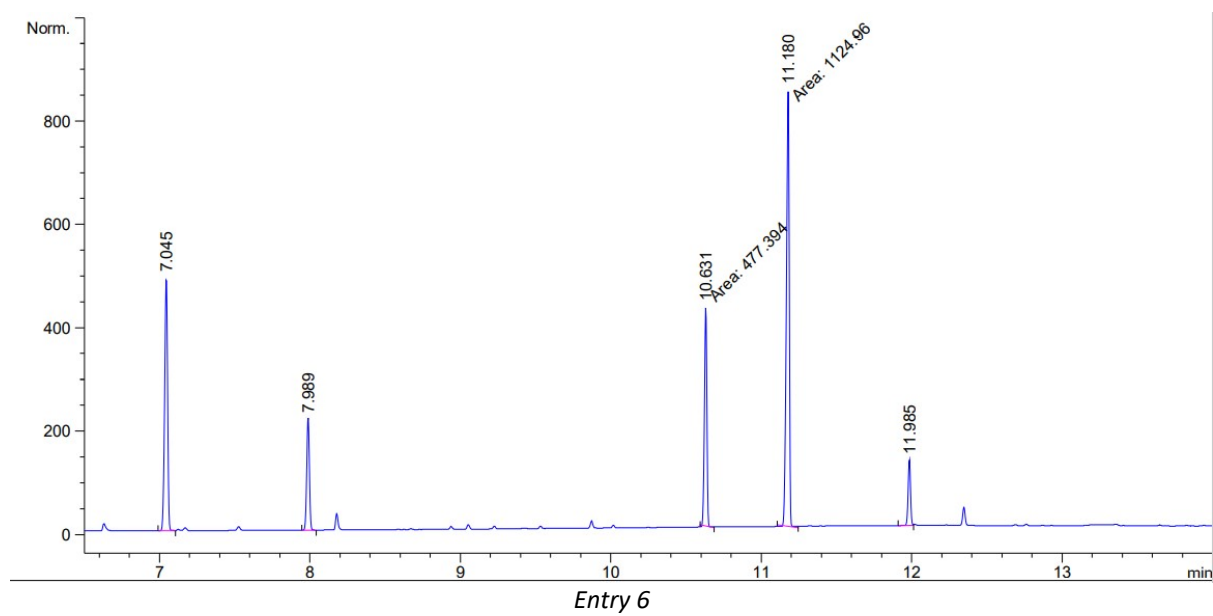

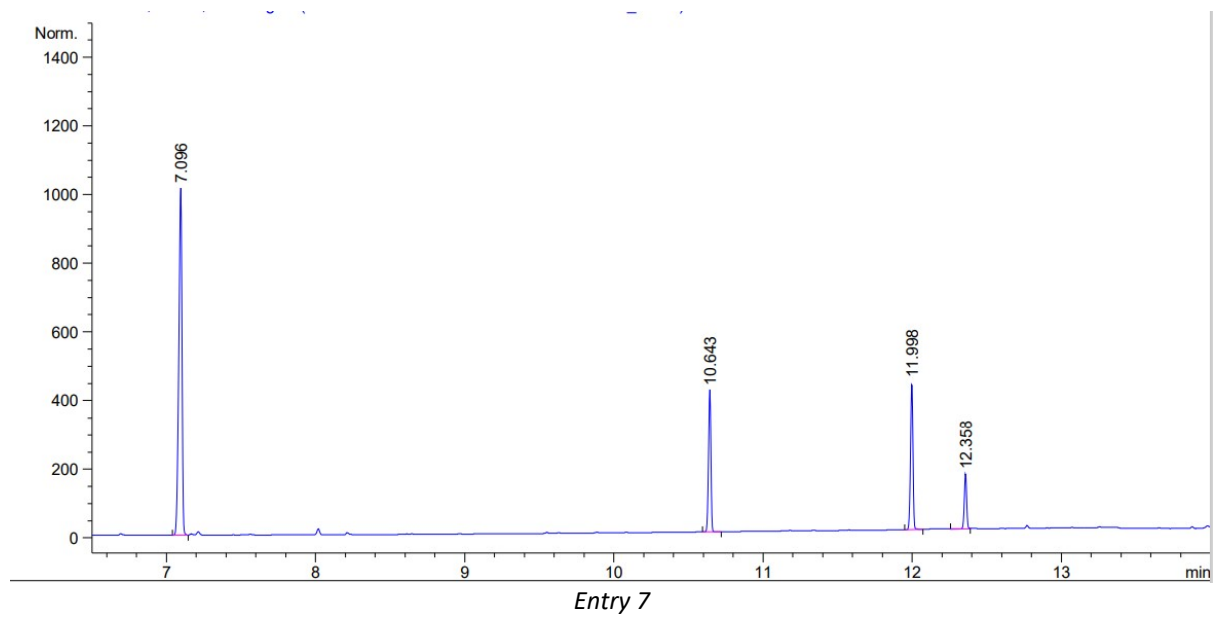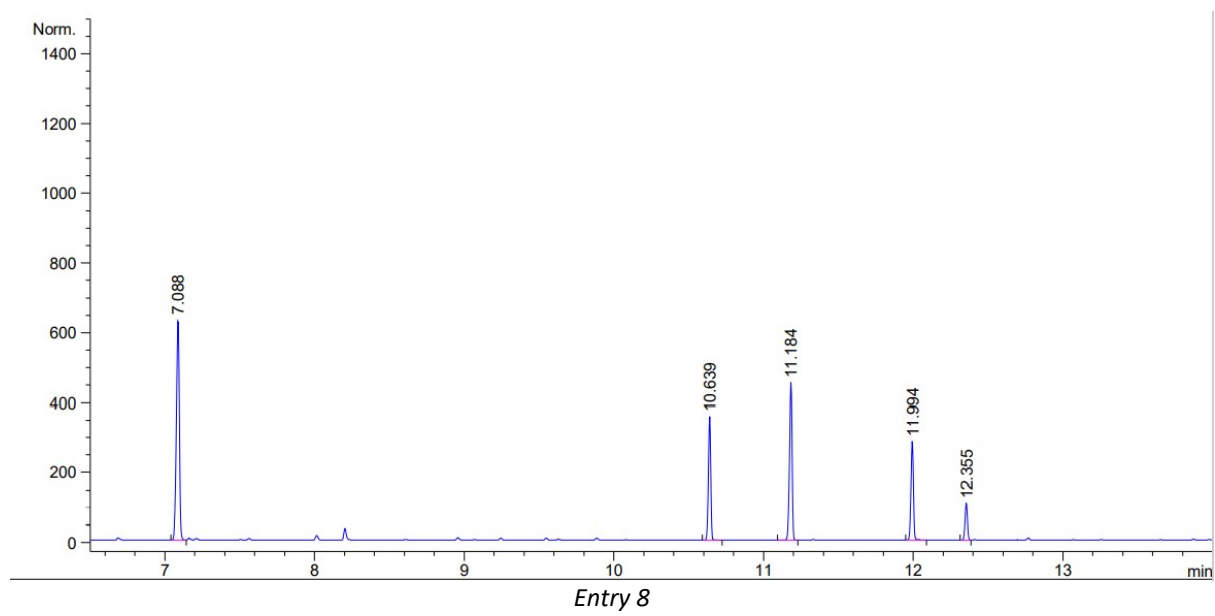

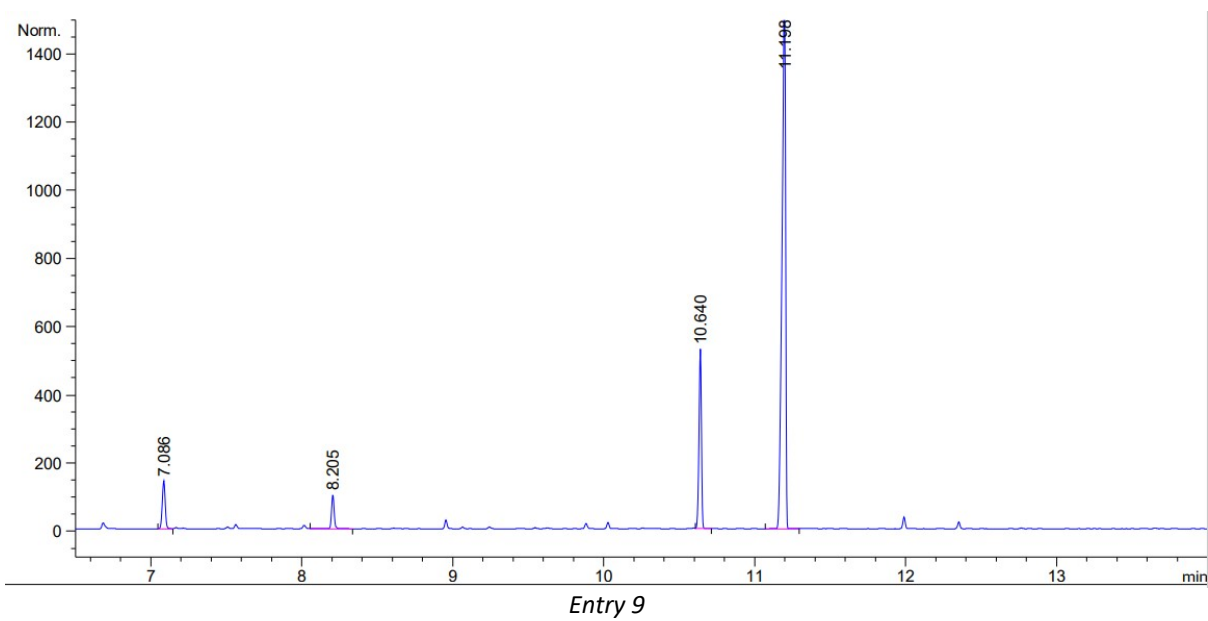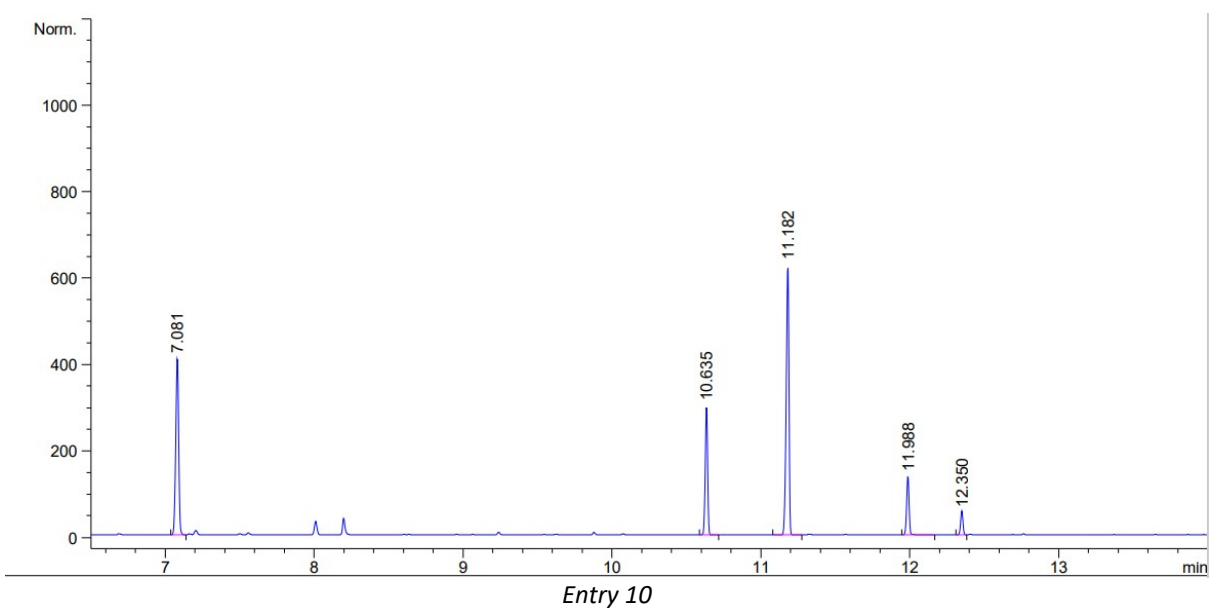



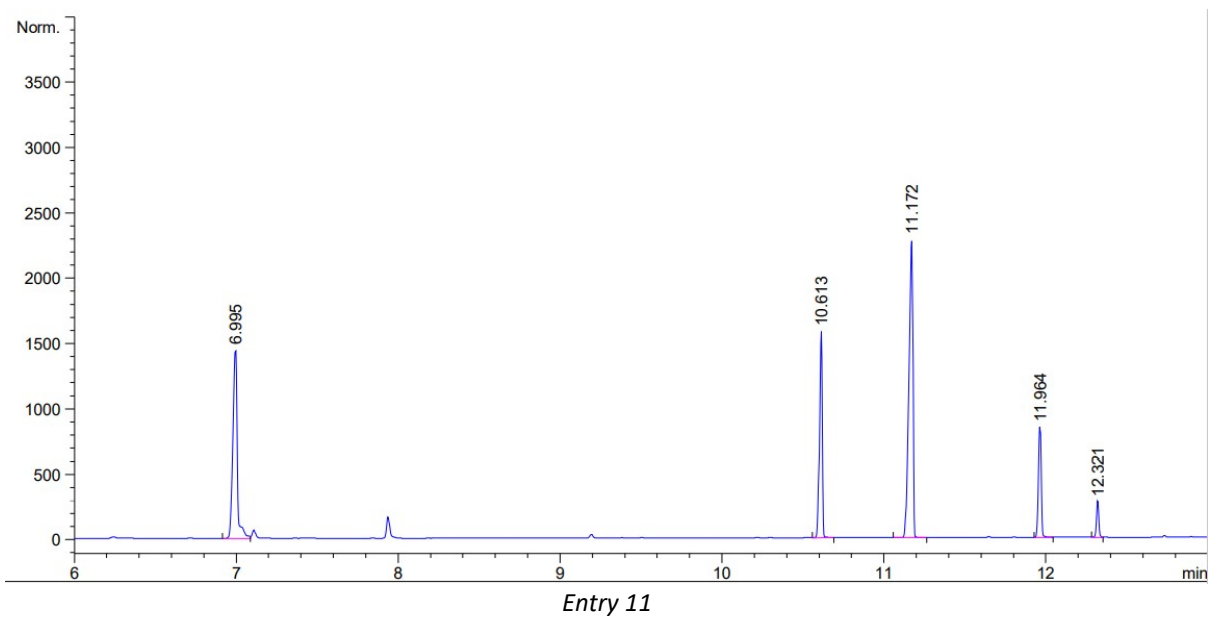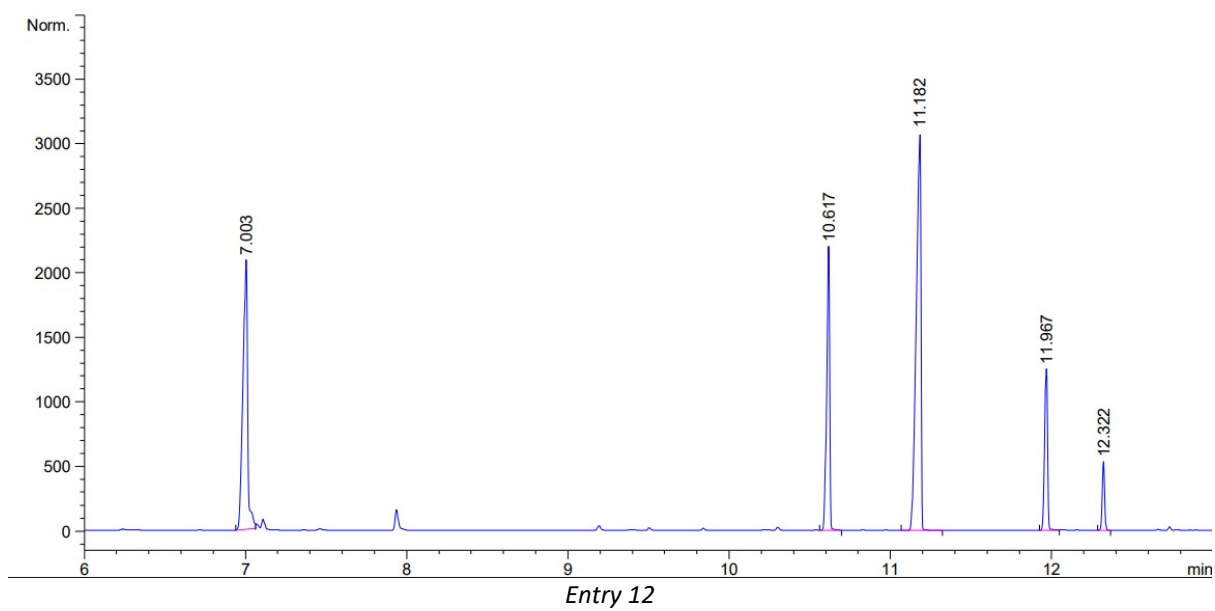

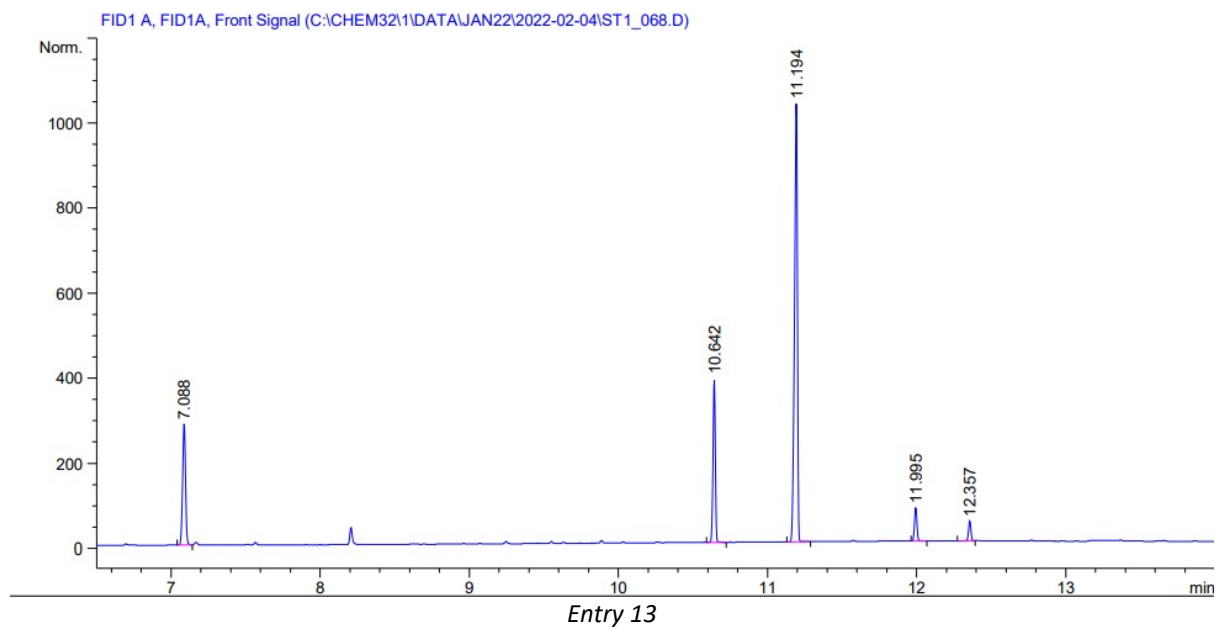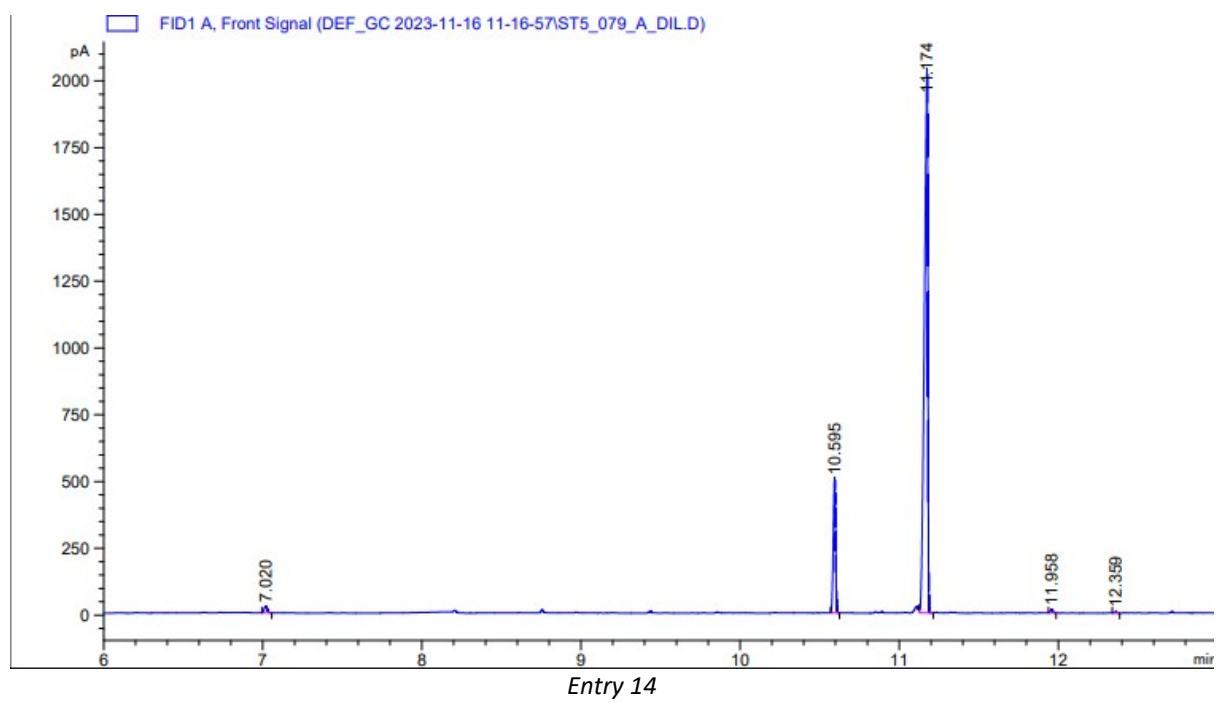

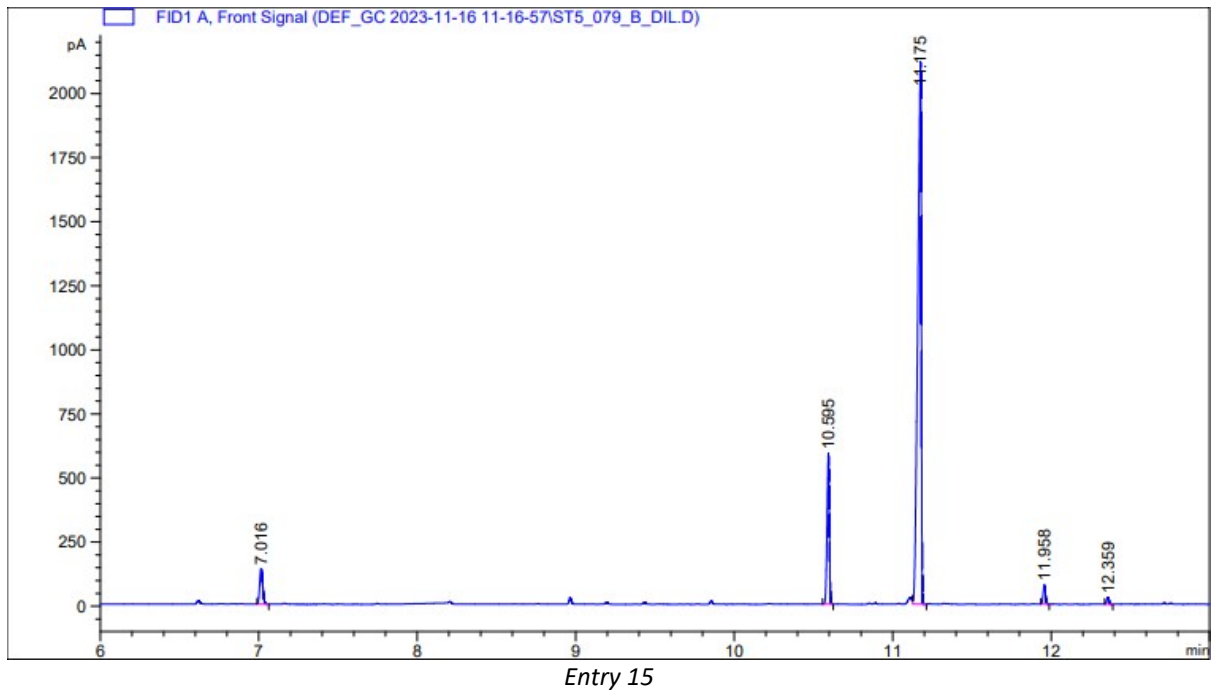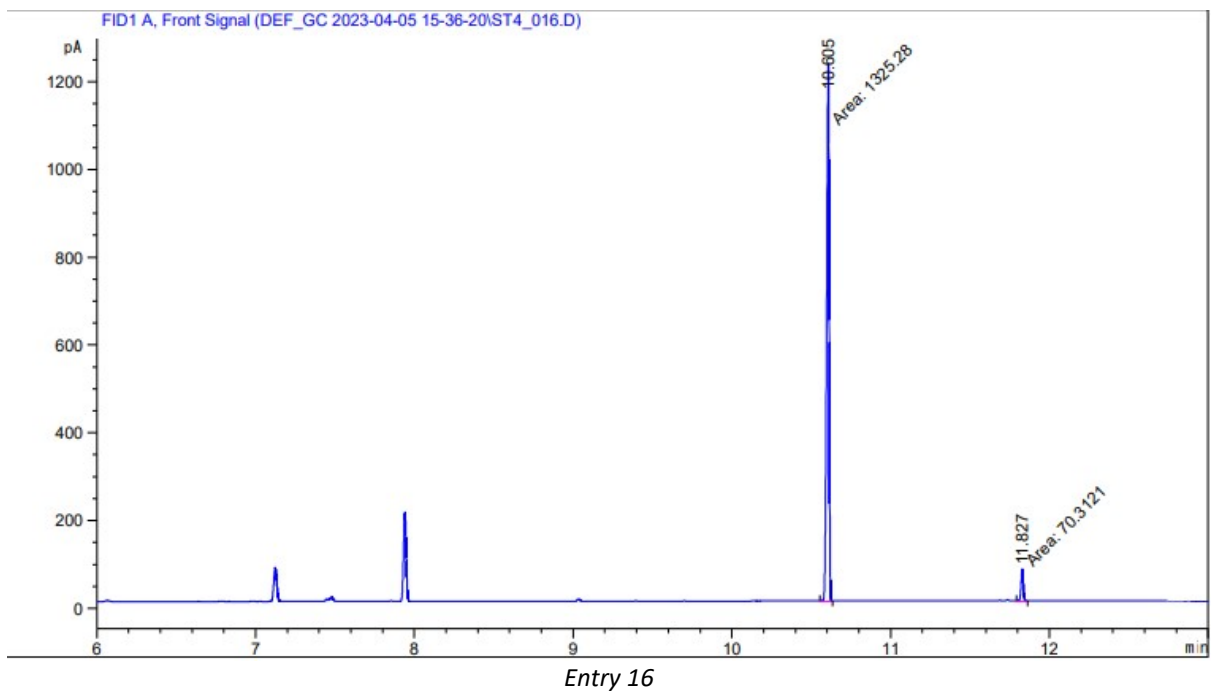

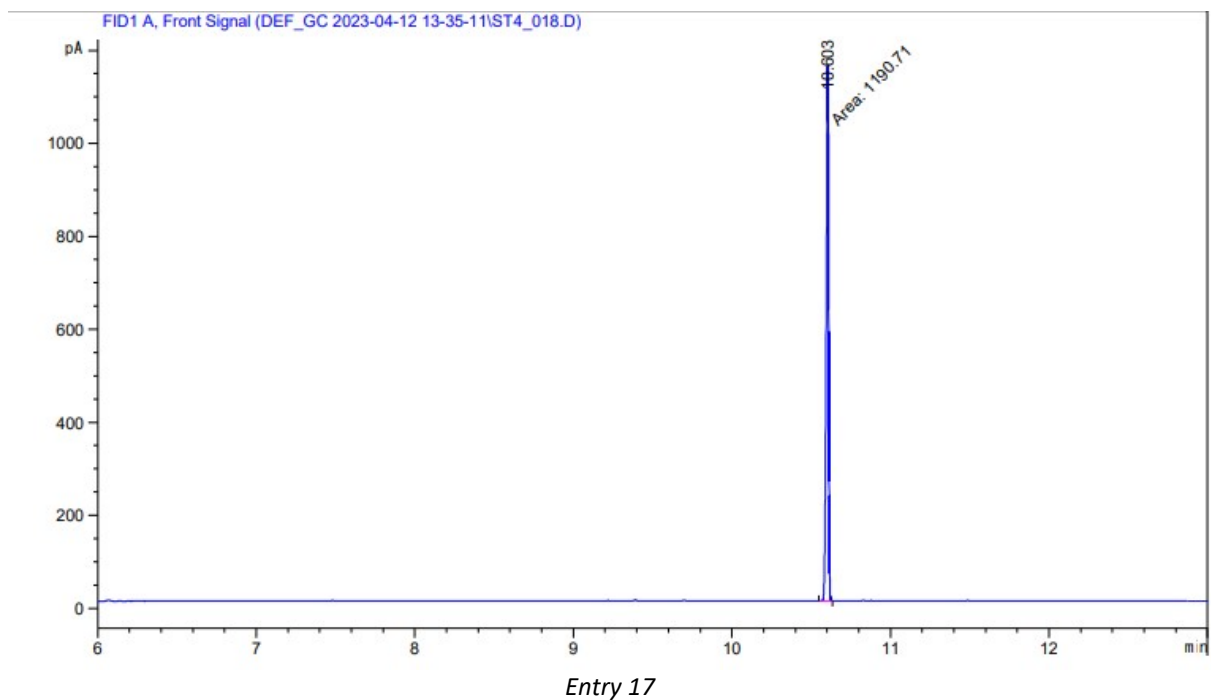

### GC-FID traces for solvent deuteration experiments (Page S15, Table S2)

Yields for deuterated analogues of compounds were measured in the same way as non-deuterated analogues.

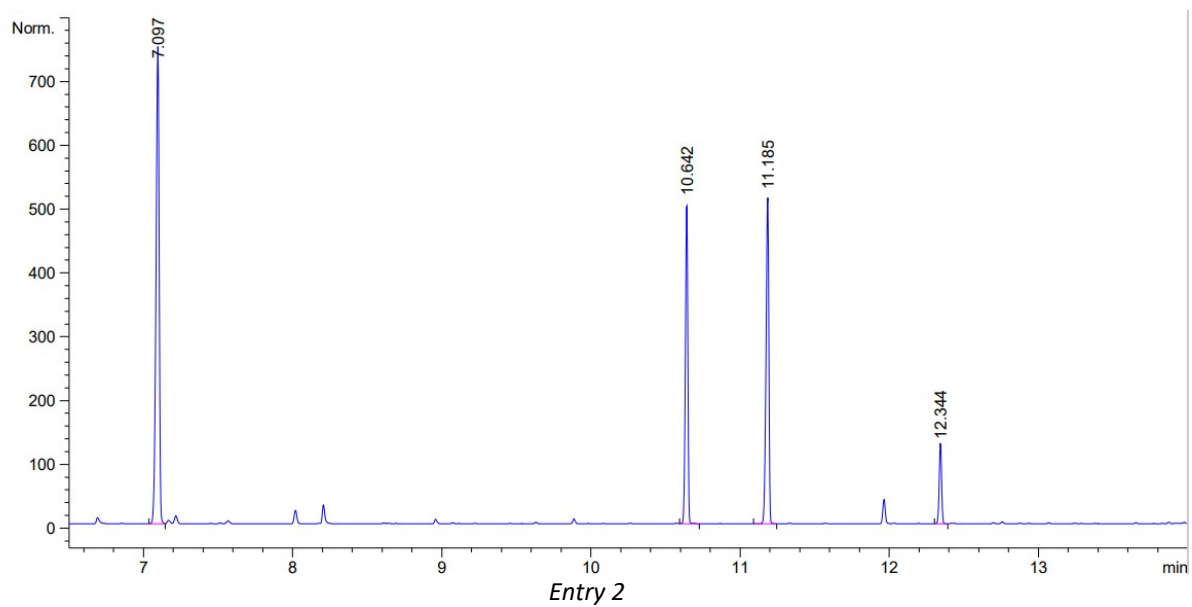

### GC-FID traces for COD/*d*<sub>9</sub>-KO<sup>t</sup>Bu experiments (Page S16, Table S3)

Yields for deuterated analogues of compounds were measured in the same way as non-deuterated analogues.

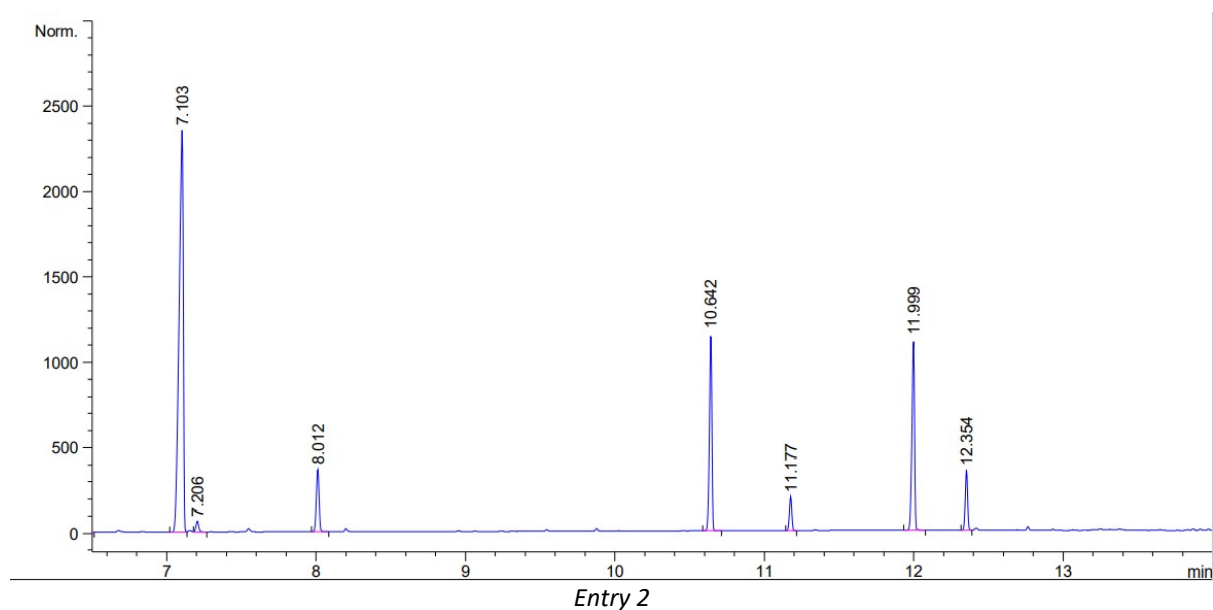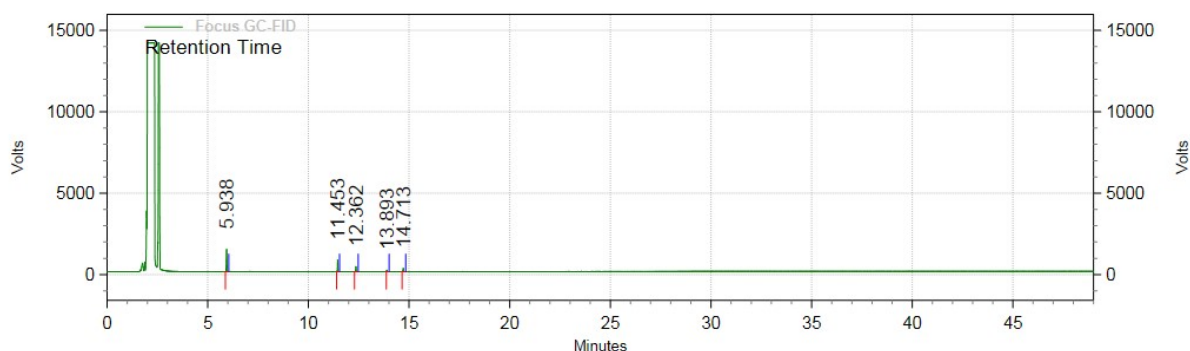

Entry 3 – For this single experiment, due to breakage of the GC-FID used in the rest of the study, a different GC-FID instrument was used to obtain data. New calibration curves were constructed for the new instrument, however this turned out to be unnecessary because results on either machine could be input into either set of calibrations to obtain identical yields. This is because our calibration method simply compares peak ratios between the internal standard and the target compound. The approximate retention times on this instrument are: *m*-xylene RT = 5.9 min, *n*-dodecane RT = 11.5 min, 2-iodo-*m*-xylene RT = 12.4 min, biphenyl RT = 13.9 min, 2,6-dimethylbiphenyl RT = 14.7.

## GC-FID traces for TEMPO reactions (Page S23, Table S4)

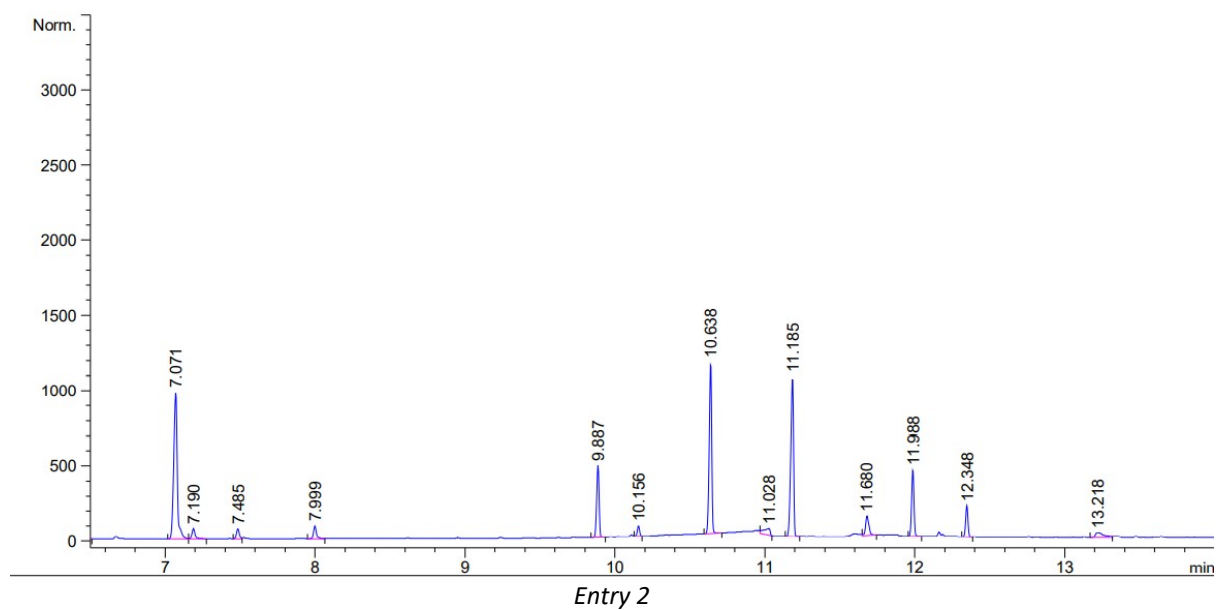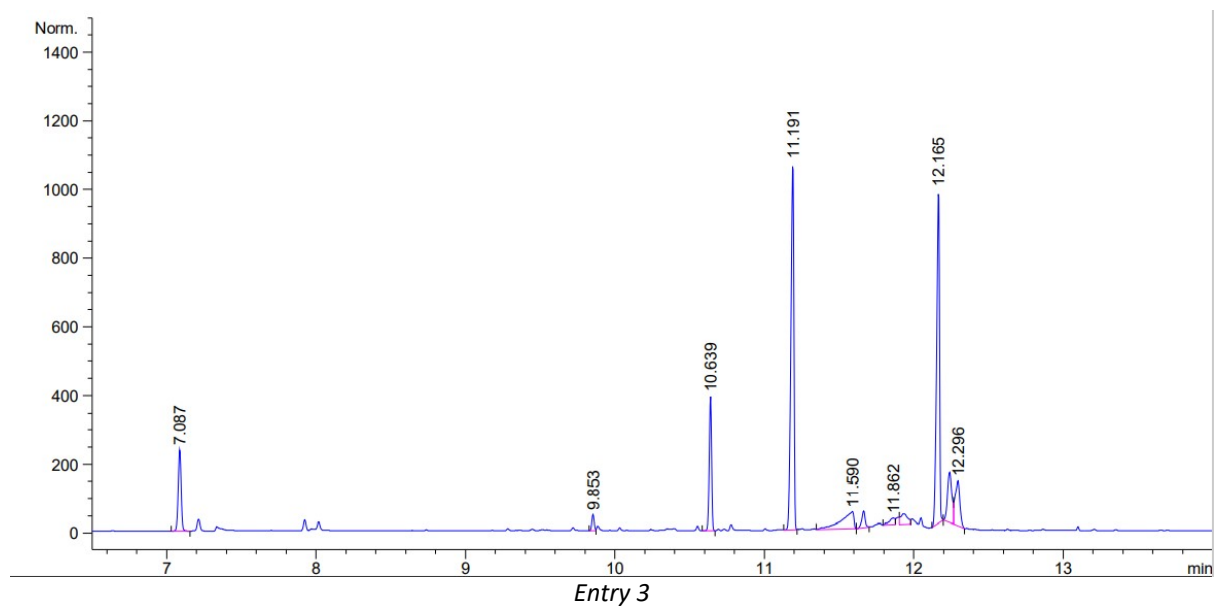

**GC-FID traces for *m*-xylene calibration curve (Page S23, Table S5)**

Samples of 0.02-1.0 mmol *m*-xylene **8** (RT = 7.1 min) and 0.1 mmol dodecane (RT = 10.7 min).

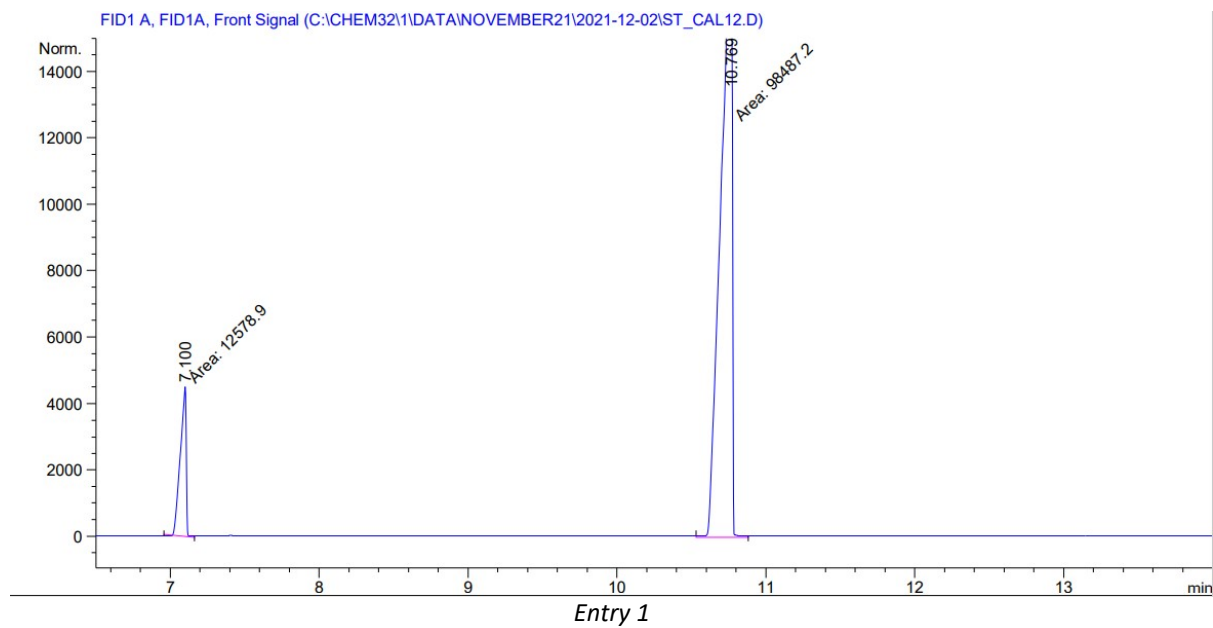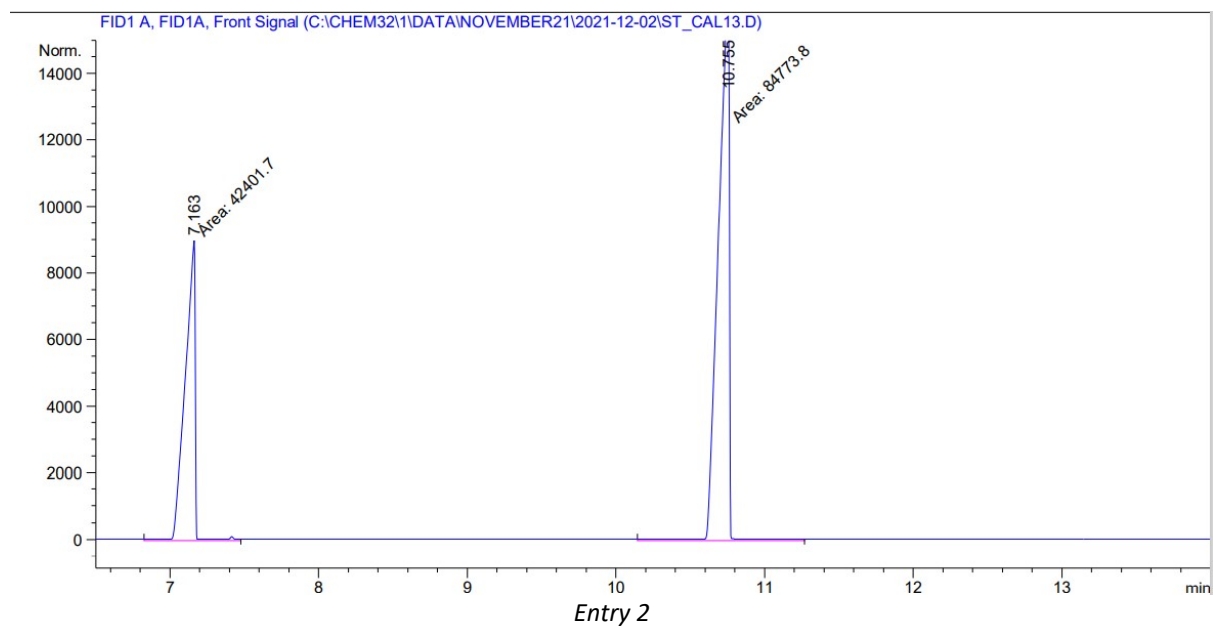

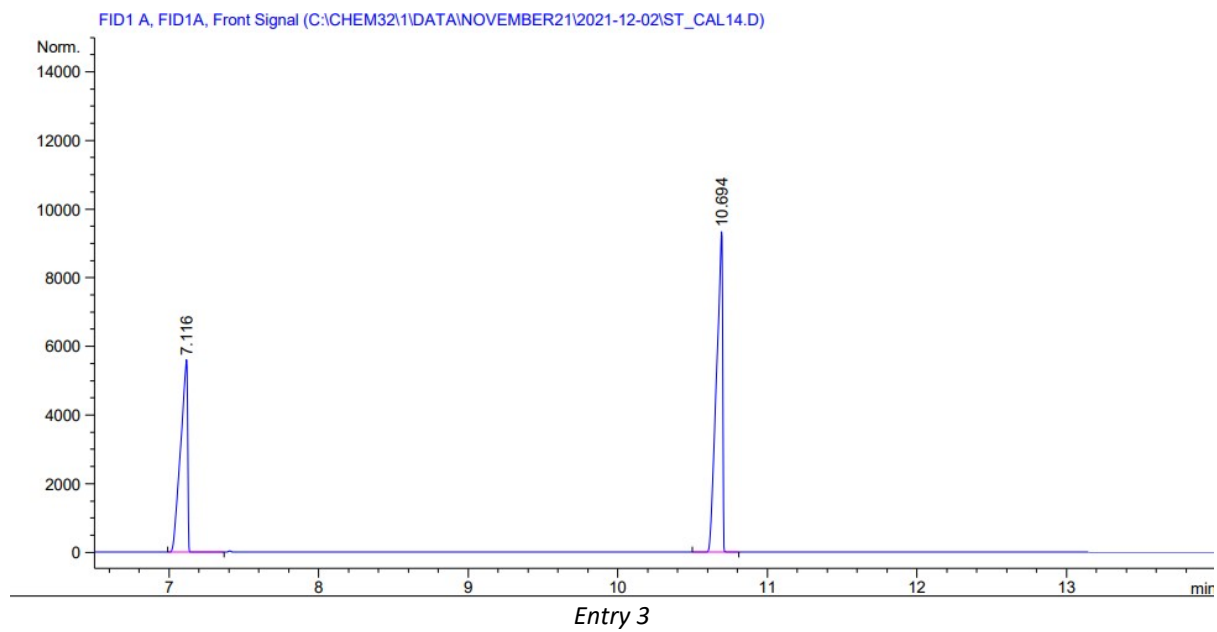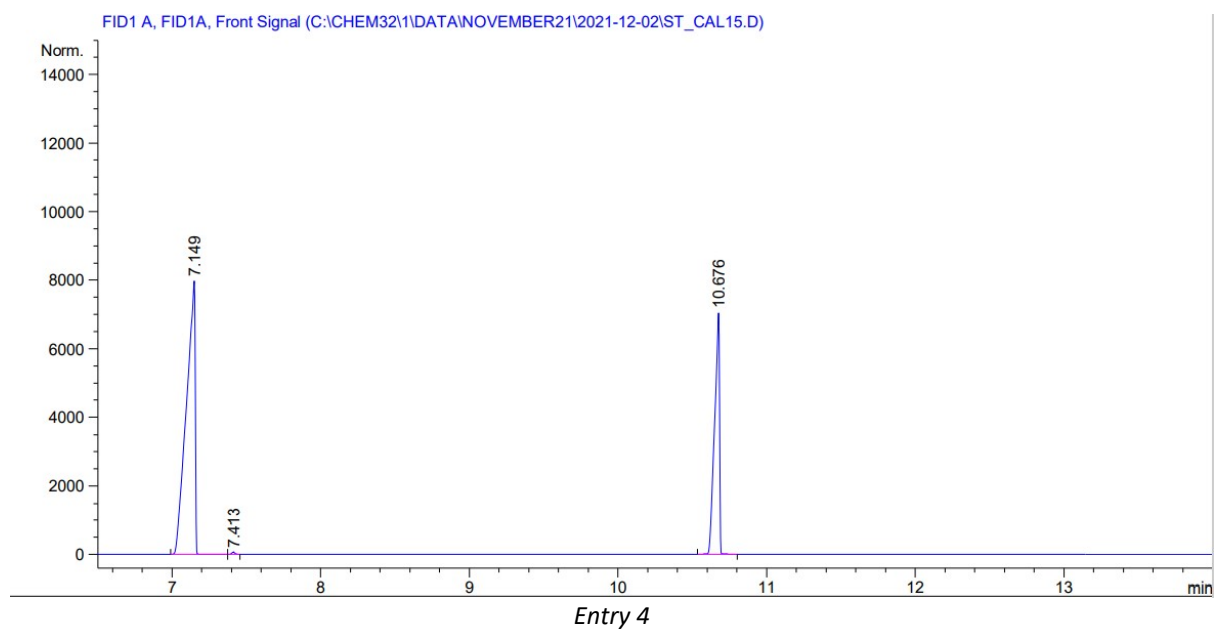



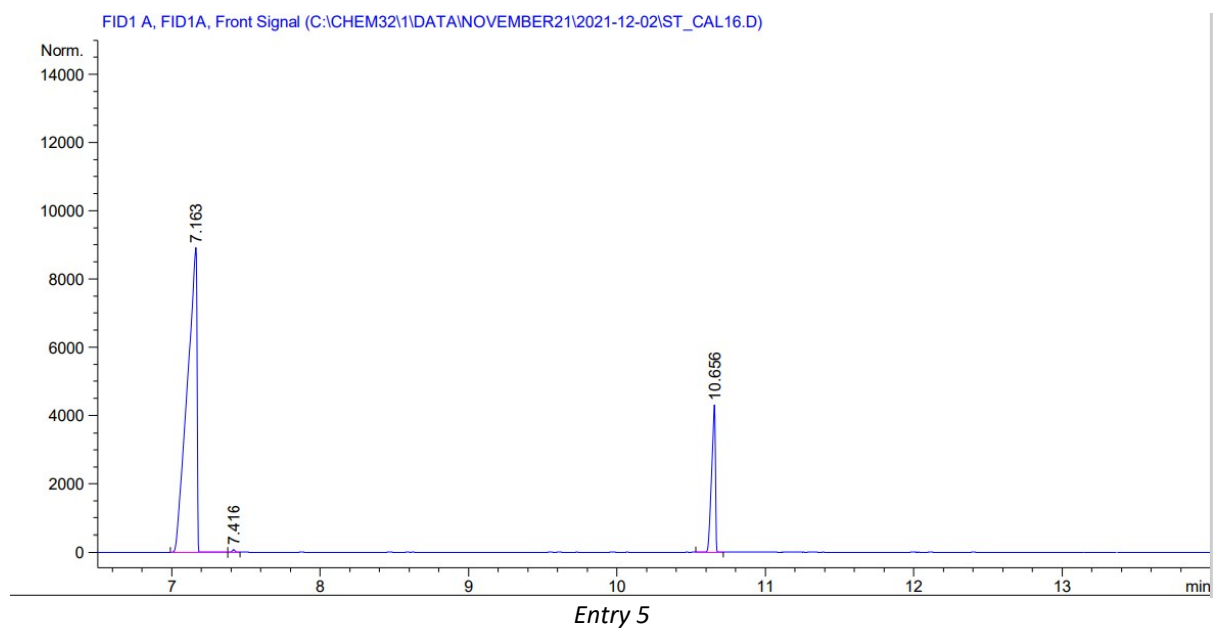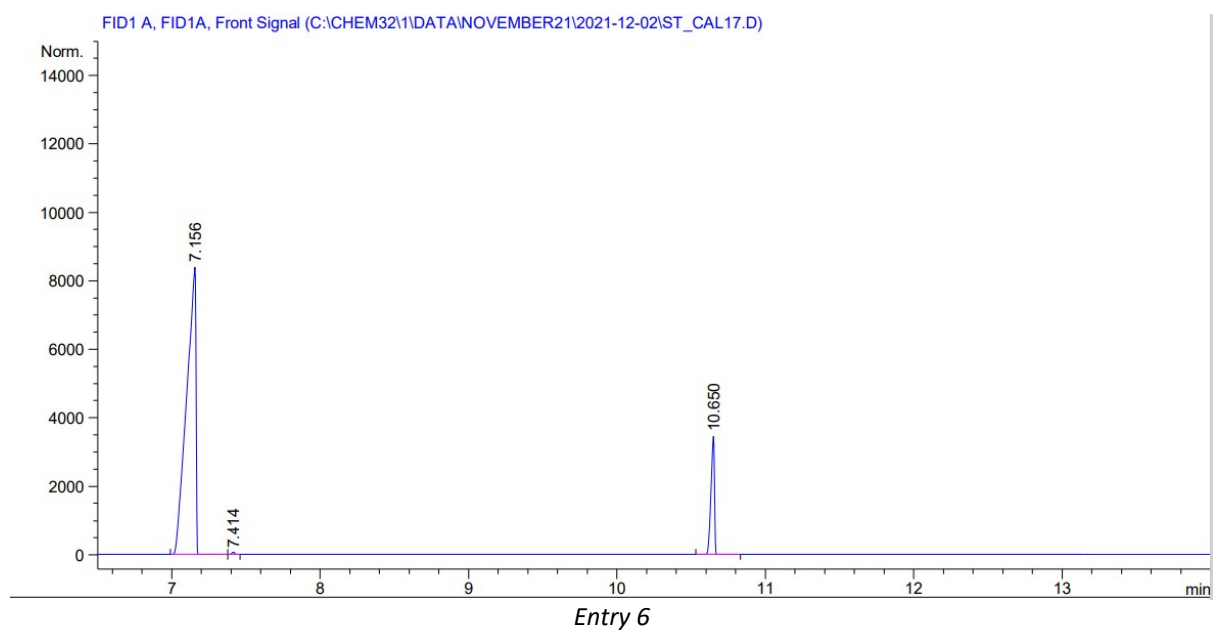

**GC-FID traces for biphenyl calibration curve (Page S23, Table S6)**

Samples of 0.014-0.7 mmol biphenyl **5** (RT = 12.0 min) and 0.1 mmol dodecane (RT = 10.7 min).

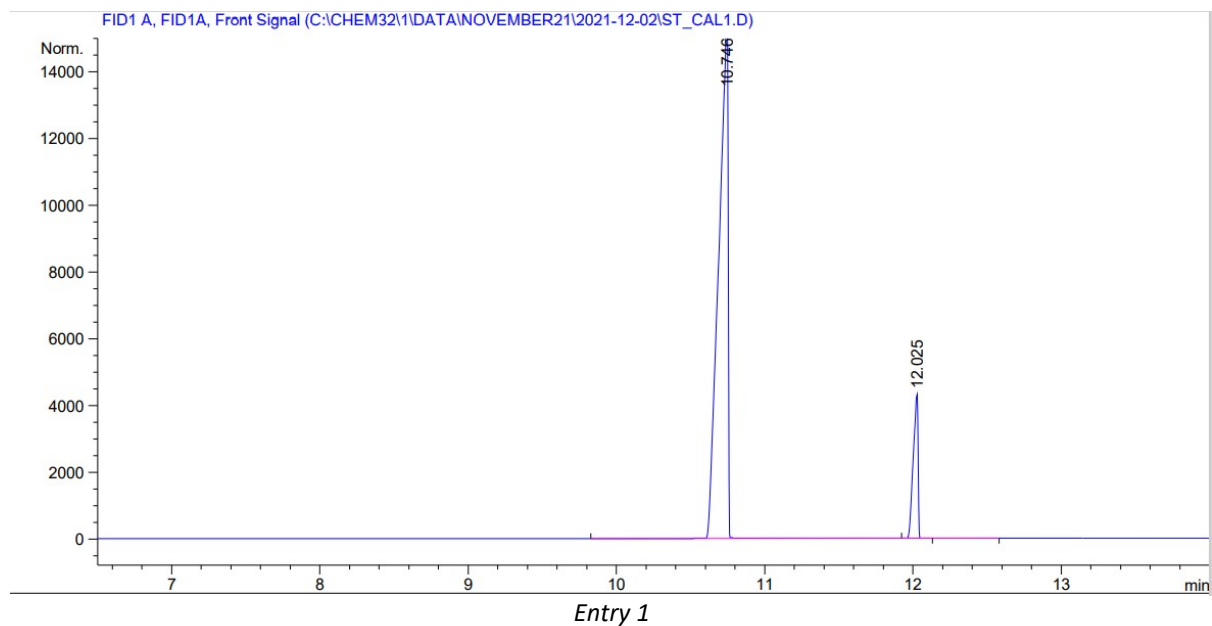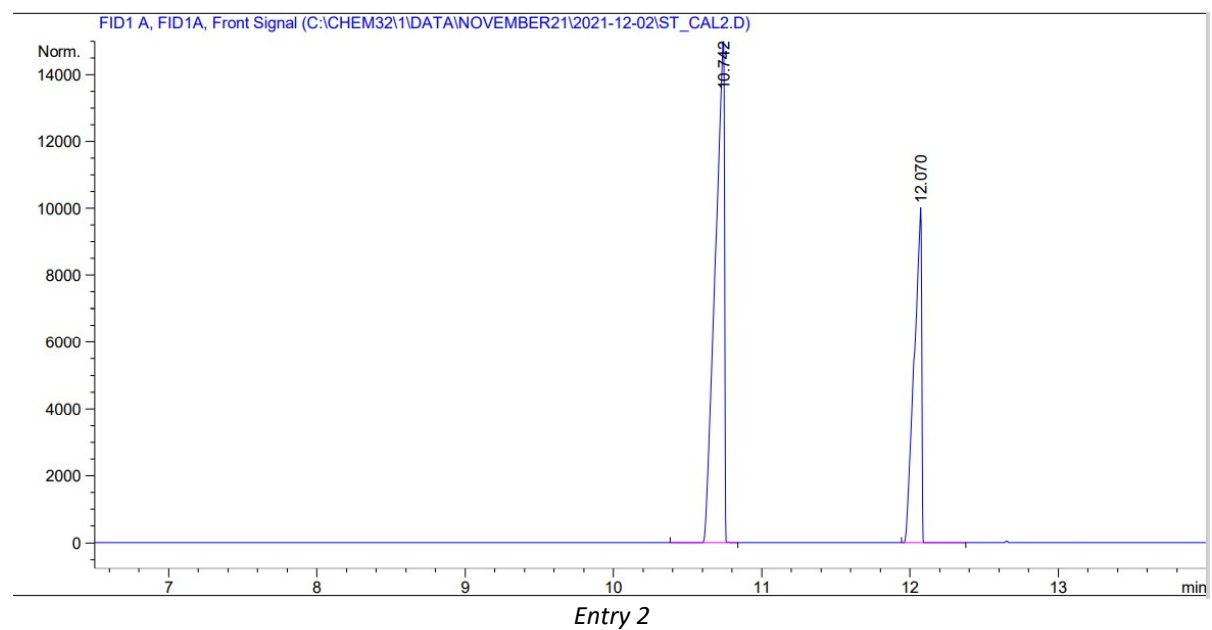

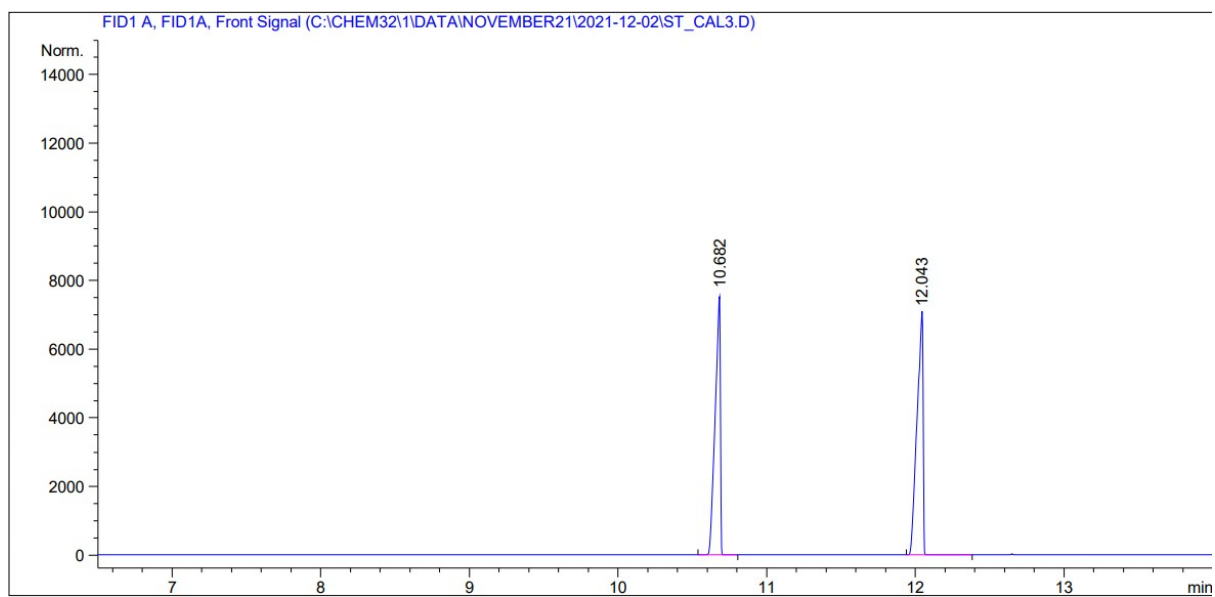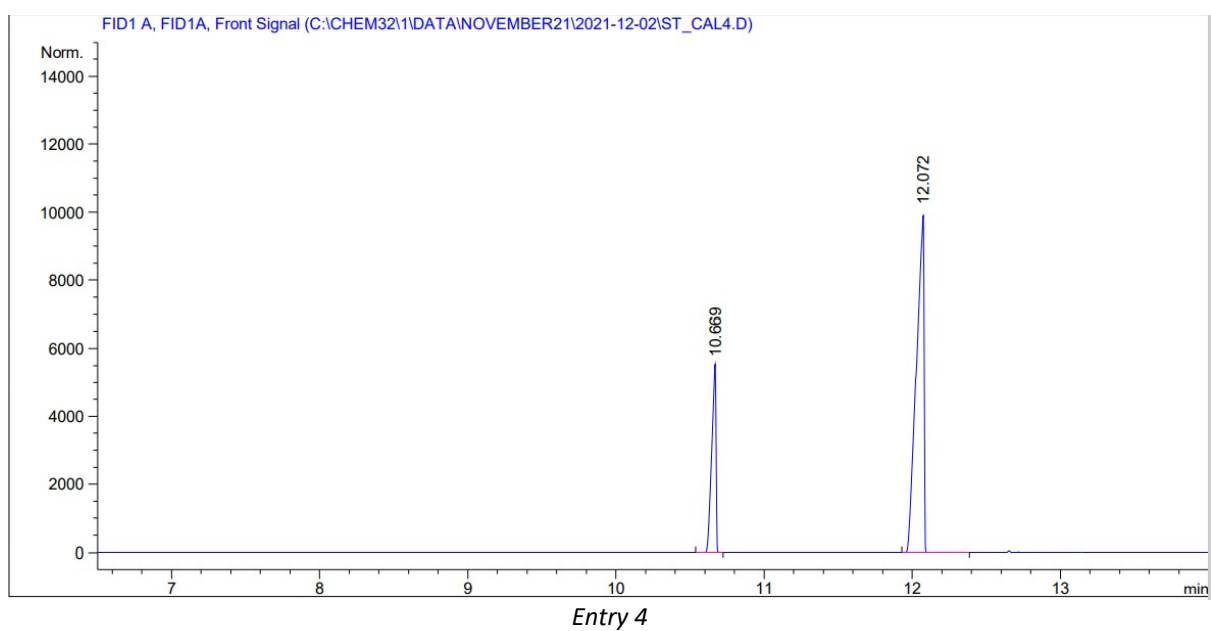

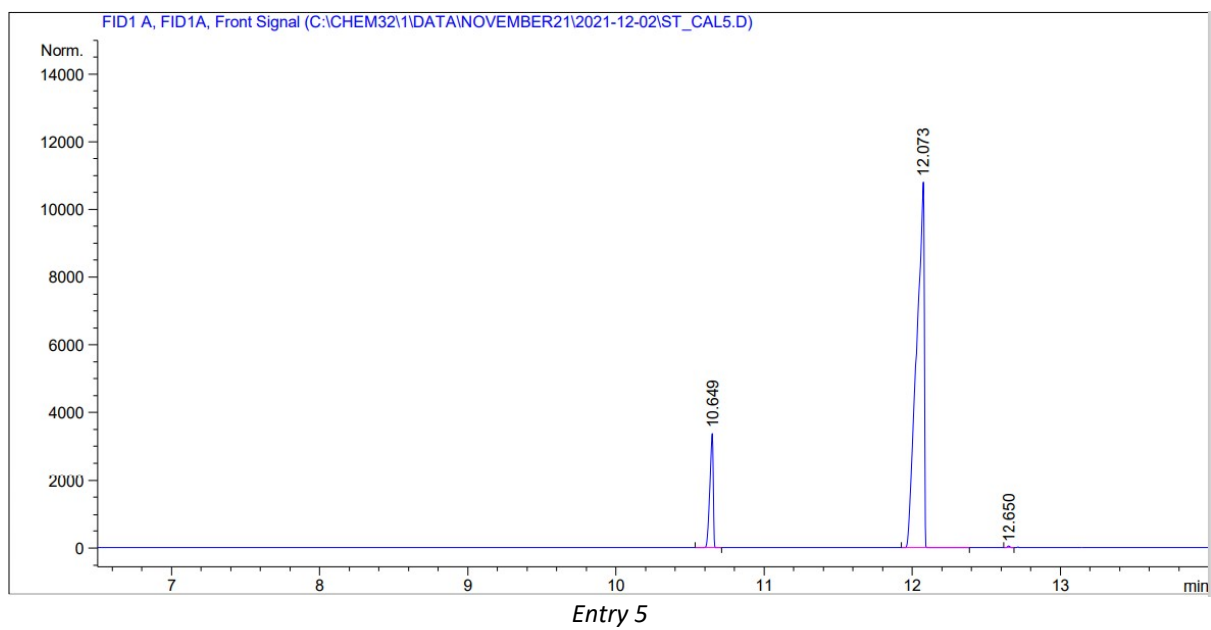

**GC-FID traces for 2,6-dimethylbiphenyl calibration curve (Page S24, Table S7)**

Samples of 0.01-0.5 mmol 2,6-dimethylbiphenyl **7** (RT = 12.4 min) and 0.1 mmol dodecane (RT = 10.7 min).

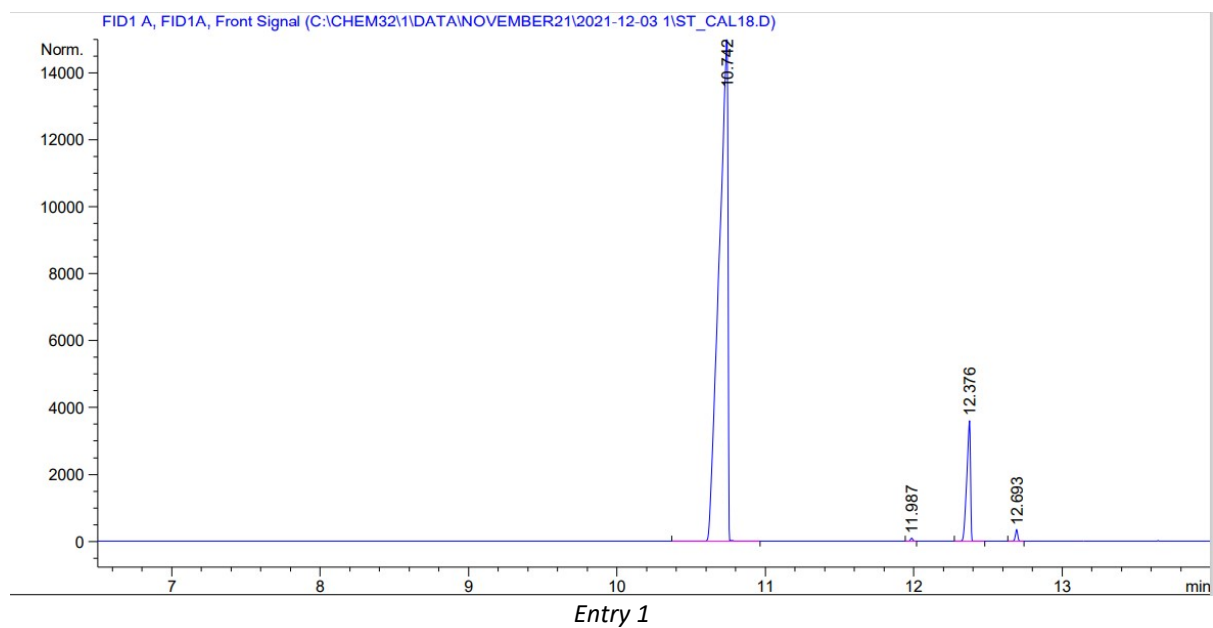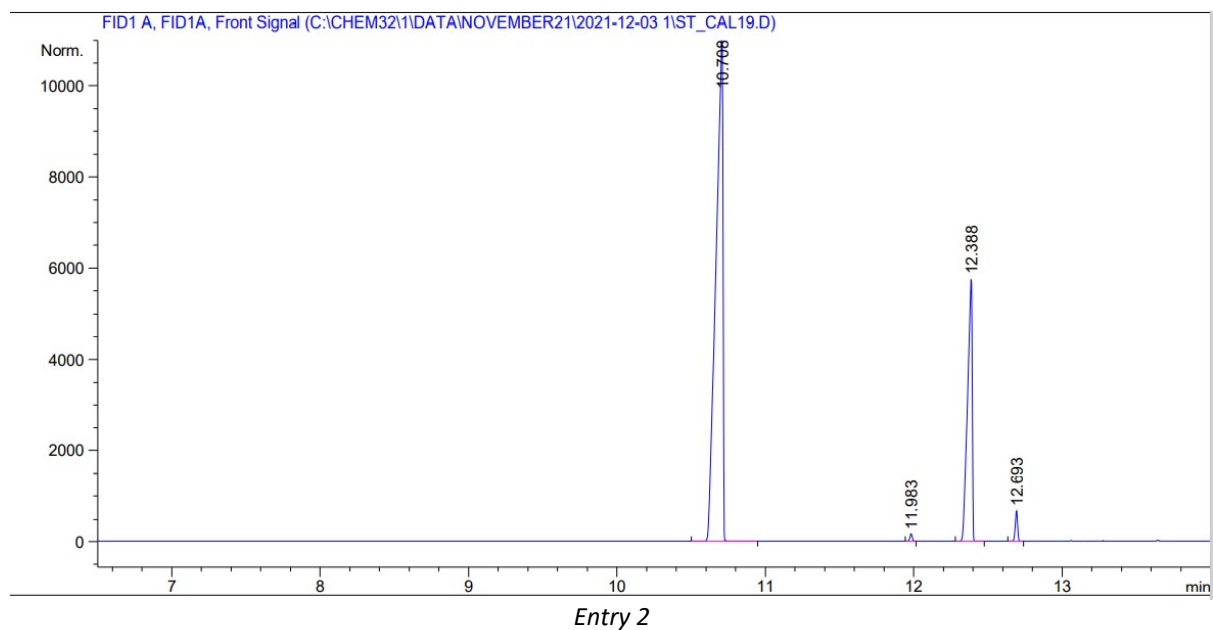

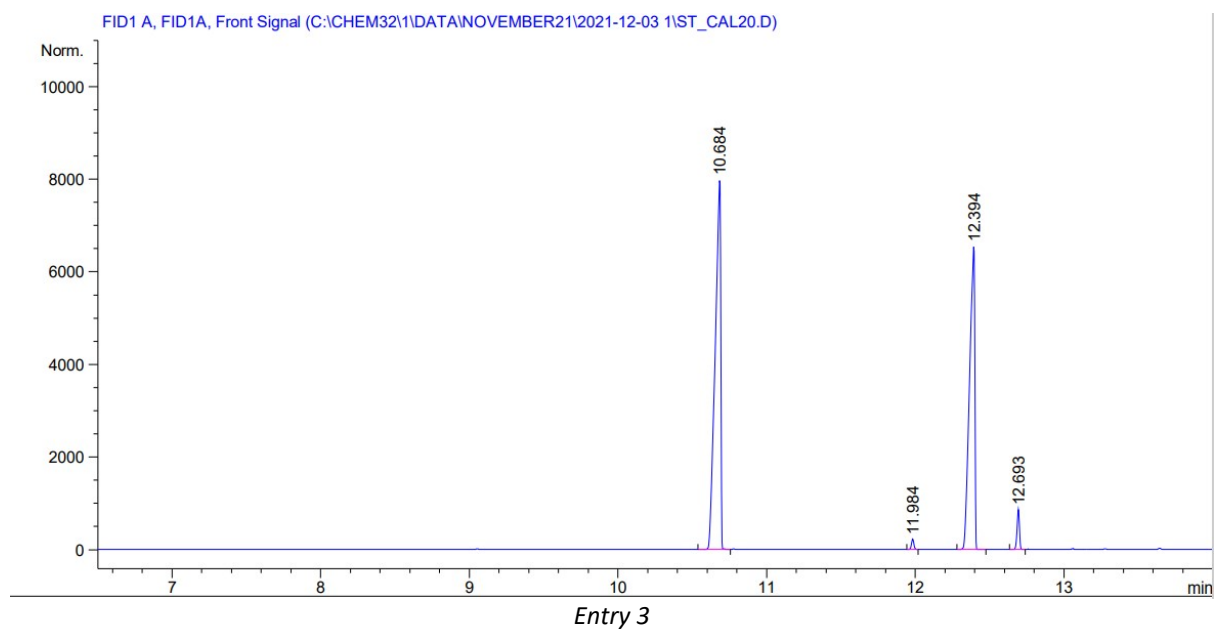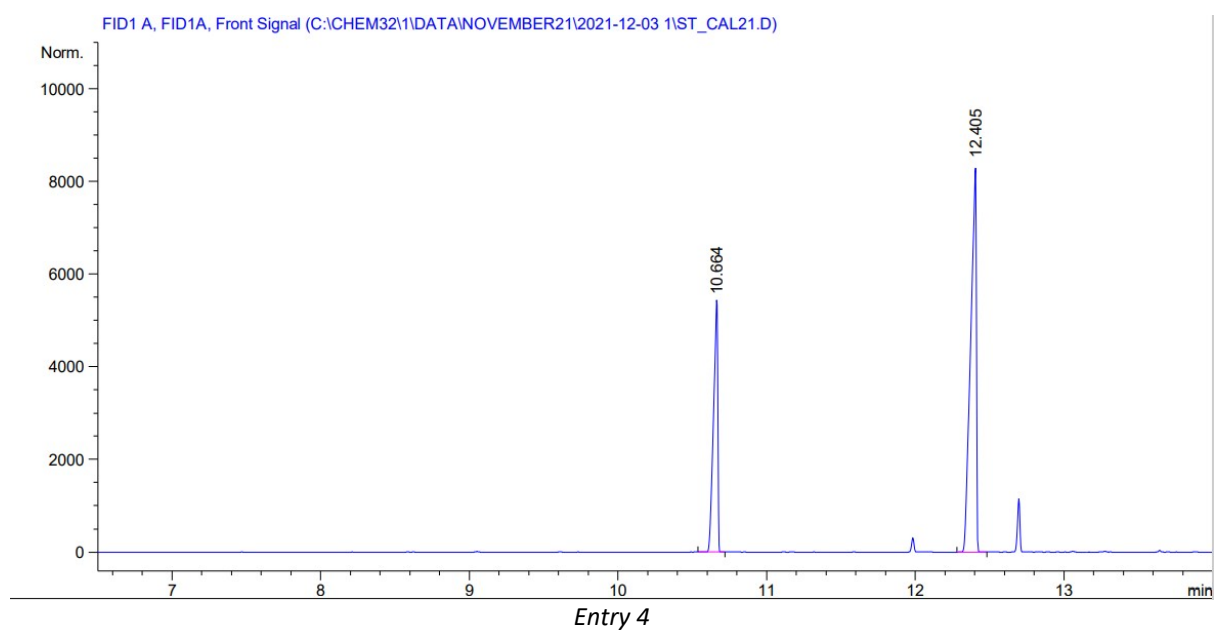

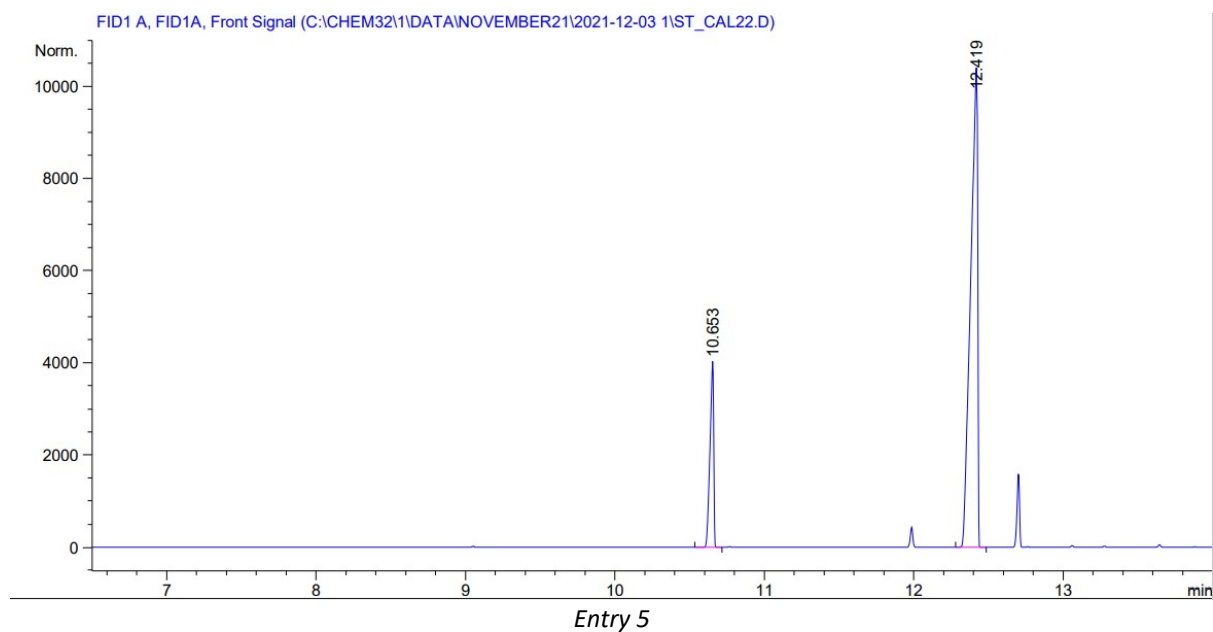

### GC-FID traces for 2,6-dimethyliodobenzene calibration curve (Page S24, Table S8)

Samples of 0.02-0.6 mmol 2,6-dimethyliodobenzene **6** (RT = 11.2 min) and 0.1 mmol dodecane (RT = 10.7 min).

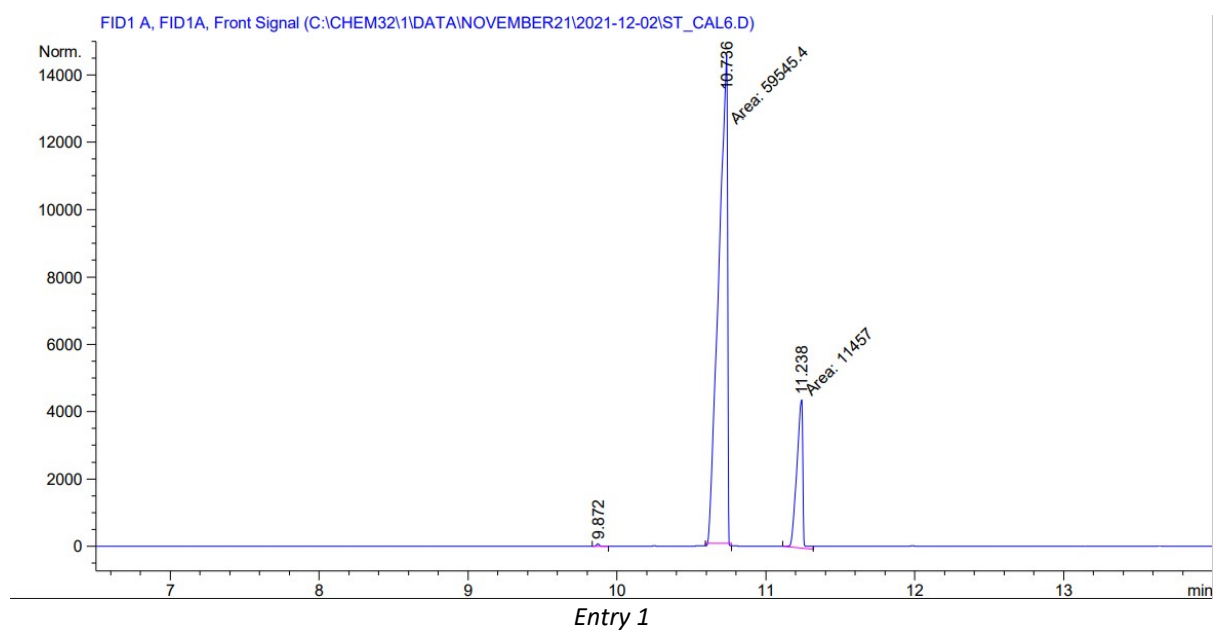

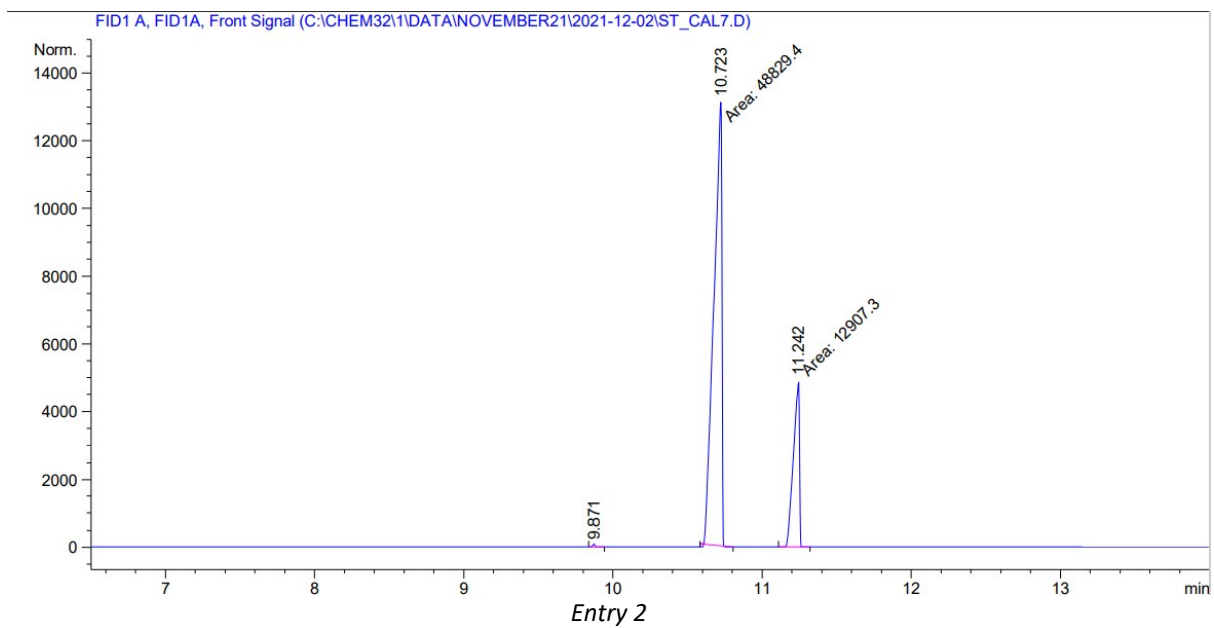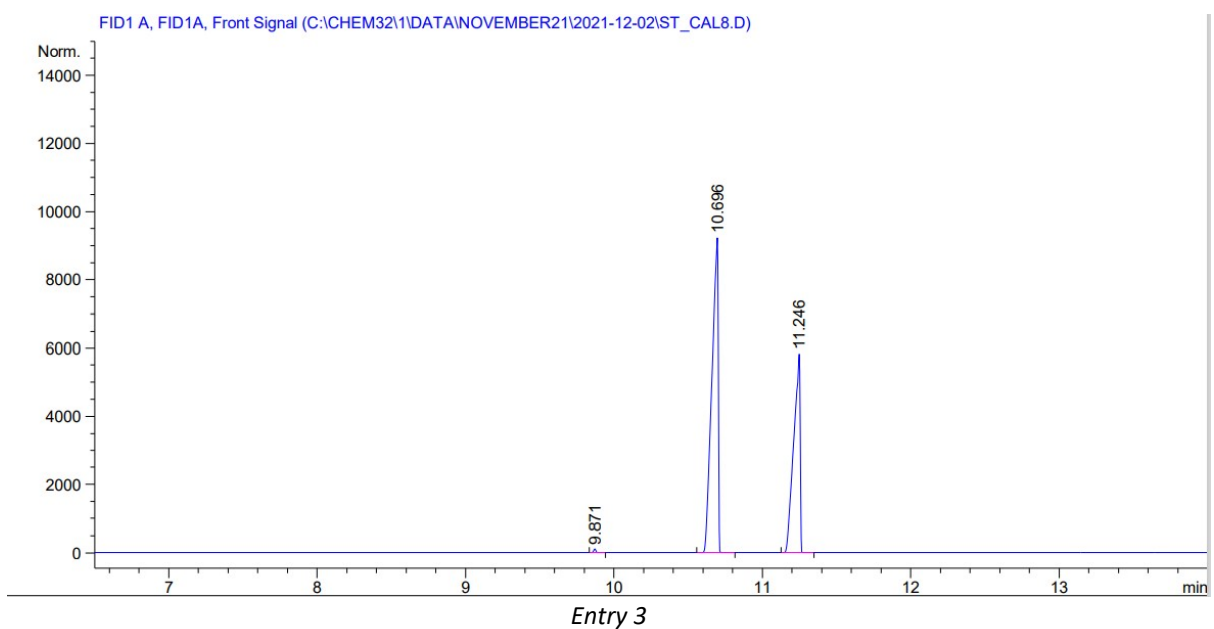



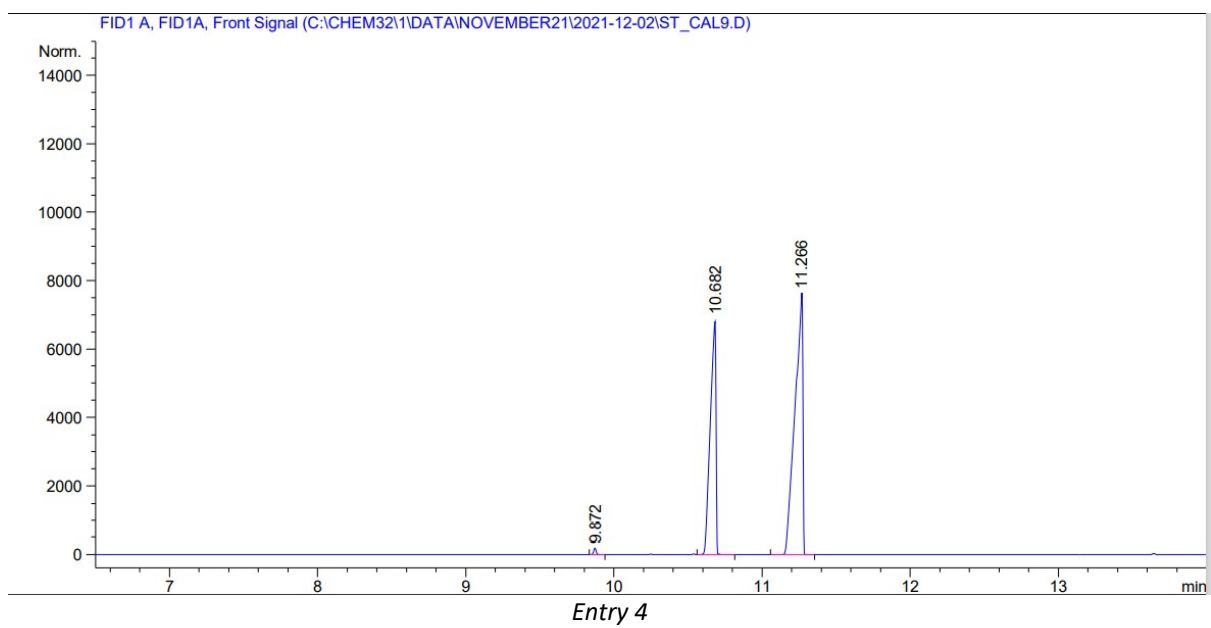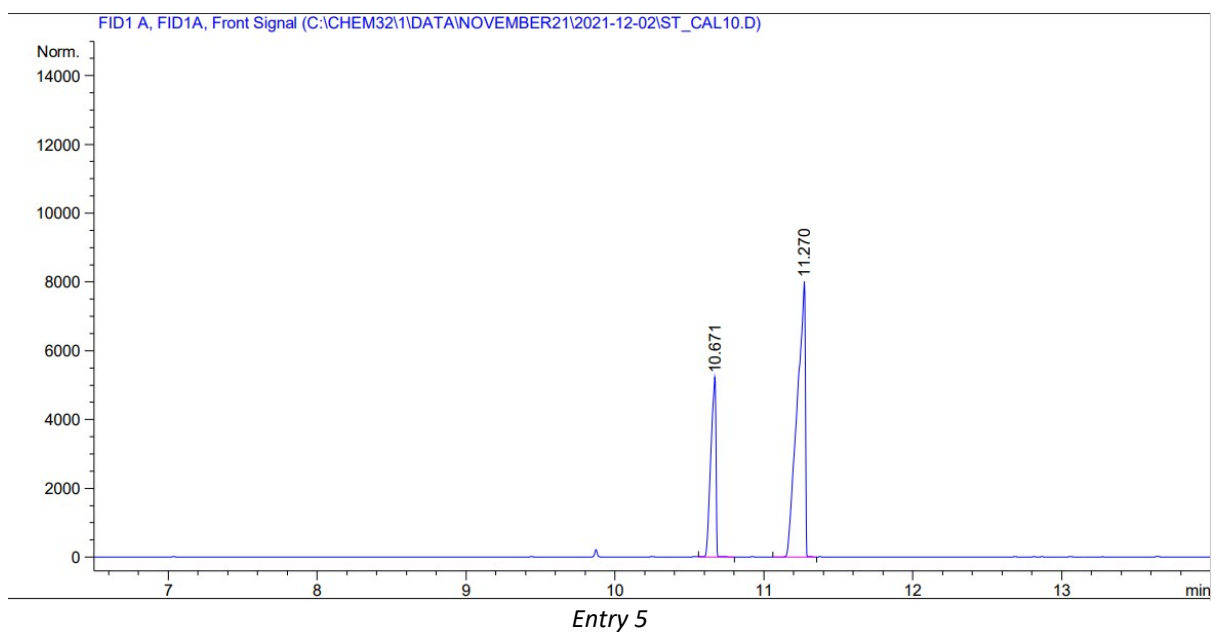

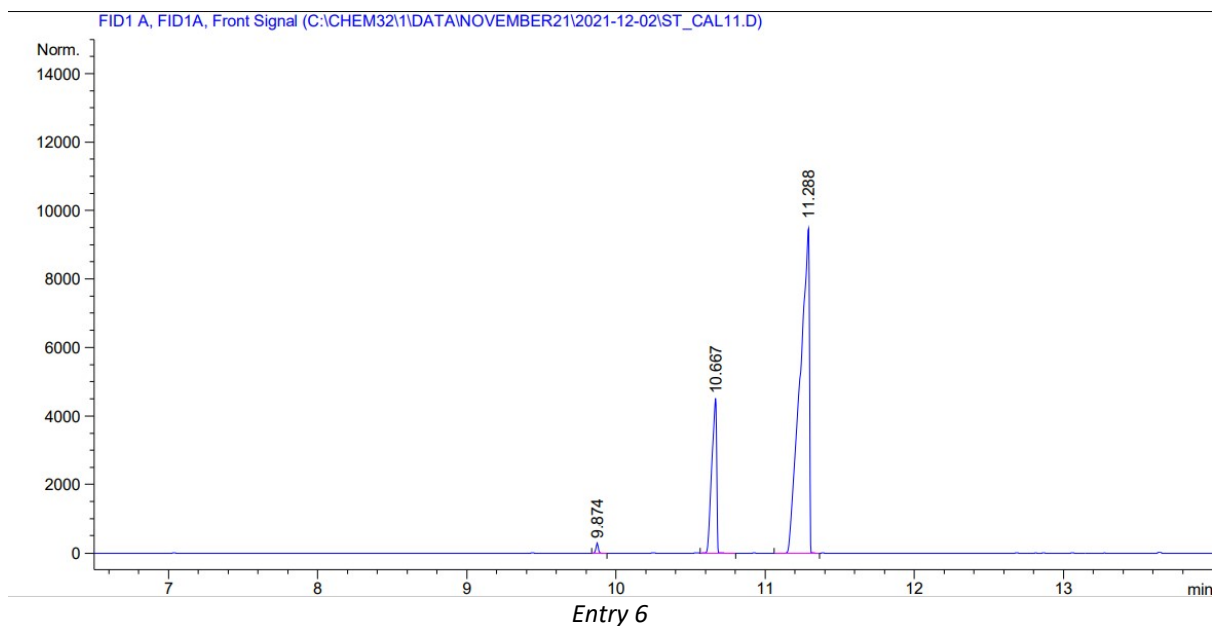

## References

- (1) V. T. Tran, Z. Q. Li, O. Apolinar, J. Derosa, M. V. Joannou, S. R. Wisniewski, M. D. Eastgate and K. M. Engle, *Angew. Chem. Int. Ed.* 2020, **59**, 7409–7413.
- (2) E. Shirakawa, K. I. Itoh, T. Higashino and T. Hayashi, *J. Am. Chem. Soc.* 2010, **132**, 15537–15539.
- (3) W. Liu, H. Cao, H. Zhang, H. Zhang, K. H. Chung, C. He, H. Wang, F. Y. Kwong and A. Lei, *J. Am. Chem. Soc.* 2010, **132**, 16737–16740.
- (4) E. Taskinen, *J. Chem. Soc., Perkin Trans. 2*, 2001, 1824–1834.
- (5) Y. Zhang, M. Wang, P. Li and L. Wang, *Org. Lett.* 2012, **14**, 2206–2209.
- (6) D. O'Hare, S. J. Heyes, S. Barlow and S. Mason, *J. Chem. Soc., Dalton Trans.* 1996, 2989–2993.
- (7) E. M. Leitao, S. R. Dubberley, W. E. Piers, Q. Wu and R. McDonald, *Chem. Eur. J.* 2008, **14**, 11565–11572.
- (8) Q. Liu, Y. Lan, J. Liu, G. Li, Y. D. Wu and A. Lei, *J. Am. Chem. Soc.* 2009, **131**, 10201–10210.
